# Supplementary material for: Gut microbiota in Parkinson's disease: Temporal stability and relations to disease progression
Source: PubMed Central journal article supplement — eBioMedicine. 2019 Jun 18;44:691–707. doi: 10.1016/j.ebiom.2019.05.064 (PMC6606744; doi:10.1016/j.ebiom.2019.05.064), 2019-06-18
Supplement: mmc1.pdf [file mmc1.pdf]

## Supplementary Materials for

# Gut Microbiota in Parkinson's Disease: Temporal stability and relations to disease progression

Velma T. E. Aho; Pedro A. B. Pereira; Sari Voutilainen; Lars Paulin; Eero Pekkonen; Petri Auvinen; Filip Scheperjans

## Table of Contents

|                                                                                                                          |           |
|--------------------------------------------------------------------------------------------------------------------------|-----------|
| <b>Supplementary results</b> .....                                                                                       | <b>1</b>  |
| <b>Dietary data analyses</b> .....                                                                                       | <b>1</b>  |
| Table S1. Component loadings from a Principal Component Analysis of Food Frequency Questionnaire data.....               | 2         |
| <b>Additional diversity analyses</b> .....                                                                               | <b>2</b>  |
| Table S2. Linear regression and interactions of alpha diversity indices, PD status and confounders.....                  | 2         |
| Table S3. Adonis: Dietary confounders, OTU-level data.....                                                               | 3         |
| <b>Parkinson's disease phenotypes and microbiota</b> .....                                                               | <b>4</b>  |
| <b>Supplementary tables for differential abundance analyses</b> .....                                                    | <b>4</b>  |
| Table S4. Differential abundance comparison results for PD status.....                                                   | 4         |
| Table S5. Model significances for random forest comparisons, PD patients/control subjects.....                           | 6         |
| Table S6. Differential abundance comparison results for disease progression (within the PD patient group).....           | 6         |
| Table S7. Model significances for random forest comparisons, progressed/stable PD patients.....                          | 9         |
| Table S8. Differential abundance comparison results for disease phenotype (TD vs PIGD; within the PD patient group)..... | 9         |
| .....                                                                                                                    | 9         |
| <b>Supplementary R Markdown</b> .....                                                                                    | <b>11</b> |

## Supplementary results

### Dietary data analyses

The subjects' diet was measured using a Food Frequency Questionnaire (FFQ). PD patients had an overall higher energy intake than control subjects ( $p = 0.005$  for intake in kcal). Considering specific food items (171 variables, including all items from the FFQ and some grouped ones, such as "all dairy products" or "all fruits and vegetables") and nutrients (46 nutrients calculated based on FFQ answers), none differed significantly between the PD and control groups after multiple comparison correction. The lowest adjusted  $p$ -values for continuous diet variables were for magnesium and niacin intake, with adjusted  $p = 0.0718$  for both. For categorical versions of the same variables, split by quintiles, the variables that had the lowest adjusted  $p$ -values were cabbage-containing dishes and pasta dishes, with adjusted  $p = 0.0984$  for both; these do not seem likely to be particularly meaningful. Overall, this suggests that there are no major dietary differences between groups that need to be considered as confounders. Contrasting stable and progressed patients suggested that they also have similar diets, with no statistically significant differences in energy intake ( $p = 0.5$  for intake in kcal) or any food items or nutrients; no variables had adjusted  $p$ -values  $< 0.1$ .

Even though there were no differences in specific dietary items, there could be differing dietary patterns between groups. To look for these, we performed a Principal Component Analysis (PCA) with a list of 31 non-overlapping food items (Table S1). This analysis did not reveal any strong patterns. The first principal component (PC1) explained 7.6% of the variation and seemed to correspond roughly to a healthy/unhealthy diet, with positive loadings for items such as candy, butter, potatoes, bread, and confectionery, and negative loadings for nuts, muesli, fish, cottage cheese and berries (Table S1). The other PCs were not as easy to interpret; for example, for PC2, the main contributing variables included margarine, cottage cheese, fruits and confectionery (positive loadings) and wine, shellfish, fish and beer (negative loadings). Visually, PC1 and PC3 seemed to best separate controls from PD patients, suggesting that patients tend to be on the unhealthy side of PC1 (Figure 3). We kept PC1 as a potential confounder to be further assessed in microbial diversity analyses.

**Table S1. Component loadings from a Principal Component Analysis of Food Frequency Questionnaire data.**

|                               | PC1    | PC2    | PC3    | PC4    | PC5    |
|-------------------------------|--------|--------|--------|--------|--------|
| Candy                         | 0.326  | -0.065 | 0.058  | -0.290 | -0.058 |
| Butters                       | 0.314  | 0.041  | -0.163 | 0.304  | 0.016  |
| Potatoes                      | 0.313  | 0.084  | -0.022 | 0.221  | 0.069  |
| Bread                         | 0.240  | 0.156  | 0.226  | 0.112  | 0.086  |
| Confectionery                 | 0.236  | 0.207  | -0.117 | 0.068  | -0.249 |
| Meat                          | 0.216  | -0.165 | -0.257 | -0.127 | 0.126  |
| Spirits                       | 0.201  | -0.164 | 0.016  | -0.023 | 0.013  |
| Sugar-sweetened drinks        | 0.135  | -0.028 | -0.257 | -0.164 | -0.237 |
| Coffee                        | 0.098  | 0.052  | 0.159  | -0.044 | 0.240  |
| Cheese                        | 0.095  | 0.130  | 0.252  | -0.325 | 0.186  |
| Artificially sweetened drinks | 0.060  | -0.125 | -0.287 | 0.262  | -0.041 |
| Beer                          | 0.052  | -0.264 | 0.147  | -0.125 | 0.034  |
| Margarine                     | 0.048  | 0.269  | 0.179  | -0.226 | 0.042  |
| Long drink                    | 0.028  | -0.157 | -0.002 | -0.069 | -0.183 |
| Wine                          | -0.014 | -0.397 | 0.206  | -0.048 | -0.020 |
| Eggs                          | -0.060 | -0.142 | -0.132 | -0.136 | 0.192  |
| Processed cheese              | -0.067 | 0.120  | -0.356 | -0.021 | 0.193  |
| Shellfish                     | -0.077 | -0.381 | -0.174 | 0.088  | 0.123  |
| Vegetables                    | -0.090 | -0.026 | 0.088  | 0.445  | 0.259  |
| Fruits                        | -0.110 | 0.209  | 0.092  | 0.239  | 0.326  |
| Milk and ice cream            | -0.119 | 0.189  | -0.113 | 0.112  | -0.136 |
| Quark                         | -0.150 | 0.022  | -0.203 | -0.260 | 0.229  |
| Fruit juice                   | -0.164 | -0.138 | -0.075 | 0.020  | 0.068  |
| Oil                           | -0.180 | -0.100 | 0.139  | 0.140  | -0.107 |
| Cereal                        | -0.182 | 0.125  | -0.059 | -0.175 | -0.260 |
| Porridge                      | -0.186 | 0.194  | -0.118 | 0.052  | -0.193 |
| Berries                       | -0.196 | 0.077  | -0.099 | -0.122 | 0.224  |
| Cottage cheese                | -0.204 | 0.212  | -0.261 | -0.163 | 0.228  |
| Fish                          | -0.207 | -0.303 | -0.084 | 0.017  | -0.091 |
| Muesli                        | -0.240 | 0.126  | 0.094  | 0.068  | -0.391 |
| Nuts                          | -0.268 | -0.069 | 0.352  | 0.053  | 0.031  |

### Additional diversity analyses

We used linear regression to explore the relationships between PD, confounders and alpha diversity, focusing on the variables that had a significant uncorrected  $p$ -value for all three indices: BMI, history of ENT surgery, and CCB medication. We found an interaction between BMI and PD in relation to the Shannon and inverse Simpson indices. The models with this interaction were a better fit and explained more variation in the data than those without it (Table S2A). A similar interaction did not improve the models for CCB medication or history of ENT surgery. Observed richness was inversely correlated with BMI regardless of PD status. We also looked for associations between alpha diversity and the Victoria Bowel Performance Scale (BPS) for stool consistency. Linear regression of average BPS score, PD status, and alpha diversity indices suggested an interaction between PD and BPS in for observed richness, but not for the Shannon and inverse Simpson indices (Table S2B).

**Table S2. Linear regression and interactions of alpha diversity indices, PD status and confounders.**

#### A. Body Mass Index (BMI; using data from both timepoints)

| Model                        | Variable  | Adjusted R-squared | Estimate | $p$ -value     |
|------------------------------|-----------|--------------------|----------|----------------|
| Observed richness ~ PD + BMI | model     | 0.033              |          | <b>0.006</b>   |
|                              | Intercept |                    | 528.93   | < <b>0.001</b> |
|                              | PD        |                    | 4.07     | 0.738          |
|                              | BMI       |                    | -4.88    | <b>0.001</b>   |
| Observed richness ~ PD * BMI | model     | 0.034              |          | <b>0.010</b>   |
|                              | Intercept |                    | 582.09   | < <b>0.001</b> |
|                              | PD        |                    | -84.87   | 0.309          |
|                              | BMI       |                    | -6.89    | <b>0.004</b>   |
|                              | PD : BMI  |                    | 3.33     | 0.281          |
| Shannon ~ PD + BMI           | model     | 0.018              |          | <b>0.039</b>   |
|                              | Intercept |                    | 4.16     | < <b>0.001</b> |
|                              | PD        |                    | -0.02    | 0.720          |
|                              | BMI       |                    | -0.01    | <b>0.013</b>   |

|                                   |           |        |                       |
|-----------------------------------|-----------|--------|-----------------------|
| <b>Shannon ~ PD * BMI</b>         | model     | 0.036  | <b><i>0.007</i></b>   |
|                                   | Intercept | 4.58   | < <b><i>0.001</i></b> |
|                                   | PD        | -0.71  | <b><i>0.017</i></b>   |
|                                   | BMI       | -0.03  | <b><i>0.001</i></b>   |
|                                   | PD : BMI  | 0.03   | <b><i>0.018</i></b>   |
| <b>Inverse Simpson ~ PD + BMI</b> | model     | 0.009  | 0.115                 |
| <b>Inverse Simpson ~ PD * BMI</b> | model     | 0.024  | <b><i>0.030</i></b>   |
|                                   | Intercept | 35.97  | < <b><i>0.001</i></b> |
|                                   | PD        | -14.84 | <b><i>0.029</i></b>   |
|                                   | BMI       | -0.57  | <b><i>0.004</i></b>   |
|                                   | PD : BMI  | 0.54   | <b><i>0.032</i></b>   |

#### B. Victoria Bowel Performance Scale (BPS; follow-up only)

| Model                               | Variable  | Adjusted R-squared | Estimate | <i>p</i> -value       |
|-------------------------------------|-----------|--------------------|----------|-----------------------|
| <b>Observed richness ~ PD + BPS</b> | model     | 0.028              |          | 0.061                 |
|                                     | Intercept |                    | 413.42   | < <b><i>0.001</i></b> |
|                                     | PD        |                    | -11.71   | 0.492                 |
|                                     | BPS       |                    | -17.43   | <b><i>0.019</i></b>   |
|                                     | model     | 0.083              |          | <b><i>0.003</i></b>   |
| <b>Observed richness ~ PD * BPS</b> | Intercept |                    | 414.48   | < <b><i>0.001</i></b> |
|                                     | PD        |                    | -6.35    | 0.703                 |
|                                     | BPS       |                    | -48.01   | < <b><i>0.001</i></b> |
|                                     | PD : BPS  |                    | 44.56    | <b><i>0.004</i></b>   |
|                                     | model     | -0.011             |          | 0.754                 |
| <b>Shannon ~ PD + BPS</b>           | model     | 0.007              |          | 0.284                 |
| <b>Inverse Simpson ~ PD + BPS</b>   | model     | -0.015             |          | 0.913                 |
| <b>Inverse Simpson ~ PD * BPS</b>   | model     | -0.013             |          | 0.723                 |

Statistically significant *p*-values are marked in bold italic font.

Regarding diet and microbiota data, we first looked for associations between diet variables and alpha diversity, using microbiota data from the follow-up timepoint, which is when the FFQ data was collected. We tested the first five PCs from the diet PCA, all nutrients, the set of 31 food items used for the PCA, and the use of probiotics. None had a significant effect on any of the three alpha diversity indices (adjusted  $p > 0.2$  for all variables).

Beta diversity comparisons for categorical dietary variables at follow-up, run with adonis on OTU level data first with only control subjects, then with all subjects correcting for PD status, resulted in two variables that were significant for both comparisons: niacin intake ( $p < 0.02$  for both) and PC1 ( $p < 0.04$  for both), indicating that overall, diet variables are not strong confounders in this data (Table S3), but that PC1 perhaps captures some dietary variation that is relevant for the microbial community composition, supporting its use in further comparisons.

**Table S3. Adonis: Dietary confounders, OTU-level data**

| Food item                     | <i>p</i> -value, controls only | <i>p</i> -value, all subjects, corrected for PD status |
|-------------------------------|--------------------------------|--------------------------------------------------------|
| Niacin                        | <b><i>0.017</i></b>            | <b><i>0.012</i></b>                                    |
| Diet PC1                      | <b><i>0.038</i></b>            | <b><i>0.026</i></b>                                    |
| Protein                       | <b><i>0.036</i></b>            | 0.145                                                  |
| Linoleic acid                 | 0.645                          | <b><i>0.039</i></b>                                    |
| Sterols                       | 0.098                          | <b><i>0.001</i></b>                                    |
| Lactose                       | 0.161                          | <b><i>0.047</i></b>                                    |
| Vitamin E                     | 0.291                          | <b><i>0.042</i></b>                                    |
| Bread (all types)             | <b><i>0.026</i></b>            | 0.141                                                  |
| Porridge                      | 0.410                          | <b><i>0.047</i></b>                                    |
| Butter / butter-type products | <b><i>0.049</i></b>            | 0.085                                                  |
| Fresh vegetables              | <b><i>0.038</i></b>            | 0.134                                                  |
| Fruit juice                   | <b><i>0.004</i></b>            | 0.273                                                  |
| Candy                         | 0.501                          | <b><i>0.047</i></b>                                    |
| Sugar-sweetened drinks        | <b><i>0.015</i></b>            | 0.095                                                  |

## Parkinson's disease phenotypes and microbiota

We ran additional comparisons to contrast the microbiota of PD patients with a tremor dominant (TD) phenotype to those representing the postural instability and gait difficulty (PIGD) phenotype. For these analyses, we used the same subset of 56 PD patients that we had selected for the progression comparisons. There was no difference in alpha diversity ( $p > 0.3$  for all three indices at both timepoints) or beta diversity ( $p > 0.2$  at both timepoints) between the TD and PIGD patients.

In differential abundance analyses, run separately at each timepoint, ANCOM detected only two OTUs at baseline and no taxa at follow-up. DESeq2 (uncorrected for confounders, run separately for each timepoint) detected longer lists of taxa; baseline: 14 OTUs, 5 genera and 2 families, follow-up: 15 OTUs, 2 genera and 1 family (Table S8B). Neither of the two ANCOM-detected OTUs were significant according to DESeq2. Out of the DESeq2 results, two OTUs (one representing the genus *Asteroleplasma*, the other an unclassified *Lachnospiraceae* OTU), the genus *Asteroleplasma* and the family *Anaeroplasmataceae* were significant at both timepoints. The difference in *Enterobacteriaceae* at baseline, which was previously detected with the metastats method in our pilot study (Scheperjans *et al.*, 2015), was significant with DESeq2 (adjusted  $p = 0.048$ ), but there was no significant difference for this family at follow-up.

## Supplementary tables for differential abundance analyses

**Table S4. Differential abundance comparison results for PD status.**

### A. ANCOM (list of all differentially abundant taxa)

| Level  | Timepoint | Taxon                                           |
|--------|-----------|-------------------------------------------------|
| Family | baseline  | Bifidobacteriaceae                              |
| Family | baseline  | Prevotellaceae                                  |
| Family | followup  | Bifidobacteriaceae                              |
| Family | followup  | Prevotellaceae                                  |
| Family | followup  | Puniceicoccaceae                                |
| Genus  | baseline  | Bifidobacterium                                 |
| Genus  | followup  | Bifidobacterium                                 |
| Genus  | followup  | Roseburia                                       |
| Genus  | followup  | Prevotella                                      |
| OTU    | baseline  | Otu0030 ( <i>Alistipes</i> )                    |
| OTU    | baseline  | Otu0104 ( <i>Clostridium IV</i> )               |
| OTU    | baseline  | Otu0007 ( <i>Bifidobacterium</i> )              |
| OTU    | baseline  | Otu0377 ( <i>Ruminococcaceae unclassified</i> ) |
| OTU    | baseline  | Otu0059 ( <i>Ruminococcaceae unclassified</i> ) |
| OTU    | baseline  | Otu0217 ( <i>Intestinimonas</i> )               |
| OTU    | followup  | Otu0104 ( <i>Clostridium IV</i> )               |
| OTU    | followup  | Otu0109 ( <i>Ruminococcus</i> )                 |
| OTU    | followup  | Otu0105 ( <i>Oscillibacter</i> )                |
| OTU    | followup  | Otu0051 ( <i>Clostridium sensu stricto</i> )    |
| OTU    | followup  | Otu0078 ( <i>Firmicutes unclassified</i> )      |
| OTU    | followup  | Otu0131 ( <i>Bacteroides</i> )                  |
| OTU    | followup  | Otu0007 ( <i>Bifidobacterium</i> )              |
| OTU    | followup  | Otu0129 ( <i>Clostridium XIVa</i> )             |

### B. Random forests (list of taxa with $p < 0.05$ for mean decrease in Gini)

| Level  | Timepoint | Taxon                   | Mean decrease in Gini | $p$ -value for mean decrease in Gini |
|--------|-----------|-------------------------|-----------------------|--------------------------------------|
| Family | baseline  | Lachnospiraceae         | 4.2204                | 0.0198                               |
| Family | baseline  | Prevotellaceae          | 3.4039                | 0.0099                               |
| Family | baseline  | Puniceicoccaceae        | 2.7669                | 0.0099                               |
| Family | baseline  | Rikenellaceae           | 4.0141                | 0.0297                               |
| Family | followup  | Bifidobacteriaceae      | 3.8736                | 0.0396                               |
| Family | followup  | Lactobacillaceae        | 2.7425                | 0.0396                               |
| Family | followup  | Puniceicoccaceae        | 2.0532                | 0.0099                               |
| Genus  | baseline  | <i>Alistipes</i>        | 2.2726                | 0.0099                               |
| Genus  | baseline  | <i>Blautia</i>          | 1.5800                | 0.0396                               |
| Genus  | baseline  | <i>Fusicatenibacter</i> | 2.0744                | 0.0099                               |
| Genus  | baseline  | <i>Prevotella</i>       | 1.6880                | 0.0495                               |
| Genus  | baseline  | <i>Roseburia</i>        | 2.2940                | 0.0198                               |
| Genus  | followup  | <i>Bifidobacterium</i>  | 2.0608                | 0.0396                               |

|       |          |                                            |        |        |
|-------|----------|--------------------------------------------|--------|--------|
| Genus | followup | Butyricicoccus                             | 2.5655 | 0.0099 |
| Genus | followup | Clostridium_XIVa                           | 2.4202 | 0.0198 |
| Genus | followup | Faecalicoccus                              | 1.3253 | 0.0099 |
| Genus | followup | Granulicatella                             | 0.5614 | 0.0495 |
| Genus | followup | Lachnospira                                | 2.0733 | 0.0495 |
| Genus | followup | Lactobacillus                              | 1.3817 | 0.0297 |
| Genus | followup | Prevotella                                 | 1.4953 | 0.0297 |
| Genus | followup | Roseburia                                  | 2.2810 | 0.0099 |
| OTU   | baseline | Otu0003 (Roseburia)                        | 0.6162 | 0.0198 |
| OTU   | baseline | Otu0008 (Fusicatenibacter)                 | 0.7087 | 0.0297 |
| OTU   | baseline | Otu0024 (Blautia)                          | 0.6429 | 0.0198 |
| OTU   | baseline | Otu0030 (Alistipes)                        | 0.8226 | 0.0099 |
| OTU   | baseline | Otu0059 (Ruminococcaceae unclassified)     | 0.5939 | 0.0198 |
| OTU   | baseline | Otu0062 (Blautia)                          | 0.4059 | 0.0297 |
| OTU   | baseline | Otu0067 (Oscillibacter)                    | 0.5226 | 0.0198 |
| OTU   | baseline | Otu0073 (Ruminococcaceae unclassified)     | 0.4875 | 0.0297 |
| OTU   | baseline | Otu0074 (Clostridium XIVa)                 | 0.6206 | 0.0099 |
| OTU   | baseline | Otu0098 (Bacteroides)                      | 0.4360 | 0.0297 |
| OTU   | baseline | Otu0104 (Clostridium IV)                   | 0.6063 | 0.0099 |
| OTU   | baseline | Otu0107 (Clostridium XIVa)                 | 0.2639 | 0.0396 |
| OTU   | baseline | Otu0110 (Ruminococcus)                     | 0.6342 | 0.0198 |
| OTU   | baseline | Otu0134 (Clostridiales unclassified)       | 0.2965 | 0.0198 |
| OTU   | baseline | Otu0154 (Ruminococcaceae unclassified)     | 0.3465 | 0.0495 |
| OTU   | baseline | Otu0164 (Clostridium XVIII)                | 0.5097 | 0.0198 |
| OTU   | baseline | Otu0171 (Bacteria unclassified)            | 0.2629 | 0.0396 |
| OTU   | baseline | Otu0202 (Lachnospiraceae unclassified)     | 0.2384 | 0.0198 |
| OTU   | baseline | Otu0217 (Intestinimonas)                   | 0.5363 | 0.0099 |
| OTU   | baseline | Otu0234 (Rhodospirillaceae unclassified)   | 0.2094 | 0.0495 |
| OTU   | baseline | Otu0249 (Rhodospirillaceae unclassified)   | 0.2297 | 0.0495 |
| OTU   | baseline | Otu0318 (Clostridium IV)                   | 0.3806 | 0.0198 |
| OTU   | baseline | Otu0377 (Ruminococcaceae unclassified)     | 0.5025 | 0.0099 |
| OTU   | baseline | Otu0381 (Clostridiales unclassified)       | 0.3233 | 0.0396 |
| OTU   | baseline | Otu0412 (Ruminococcaceae unclassified)     | 0.3298 | 0.0396 |
| OTU   | baseline | Otu0429 (Bacteria unclassified)            | 0.1397 | 0.0396 |
| OTU   | baseline | Otu0437 (Clostridium IV)                   | 0.3311 | 0.0297 |
| OTU   | baseline | Otu0444 (Lachnospiraceae unclassified)     | 0.3098 | 0.0396 |
| OTU   | baseline | Otu0455 (Ruminococcaceae unclassified)     | 0.4739 | 0.0099 |
| OTU   | baseline | Otu0513 (Anaerotruncus)                    | 0.3573 | 0.0297 |
| OTU   | baseline | Otu0575 (Clostridiales unclassified)       | 0.6427 | 0.0099 |
| OTU   | baseline | Otu0586 (Ruminococcaceae unclassified)     | 0.2649 | 0.0198 |
| OTU   | baseline | Otu0625 (Clostridiales unclassified)       | 0.4693 | 0.0099 |
| OTU   | followup | Otu0003 (Roseburia)                        | 0.5975 | 0.0198 |
| OTU   | followup | Otu0024 (Blautia)                          | 0.6578 | 0.0198 |
| OTU   | followup | Otu0036 (Roseburia)                        | 0.4256 | 0.0297 |
| OTU   | followup | Otu0052 (Ruminococcaceae unclassified)     | 0.3710 | 0.0198 |
| OTU   | followup | Otu0070 (Lachnospiraceae unclassified)     | 0.3858 | 0.0495 |
| OTU   | followup | Otu0073 (Ruminococcaceae unclassified)     | 0.7037 | 0.0099 |
| OTU   | followup | Otu0074 (Clostridium XIVa)                 | 0.9225 | 0.0099 |
| OTU   | followup | Otu0083 (Butyricicoccus)                   | 0.4362 | 0.0396 |
| OTU   | followup | Otu0104 (Clostridium IV)                   | 0.9145 | 0.0099 |
| OTU   | followup | Otu0105 (Oscillibacter)                    | 0.4399 | 0.0099 |
| OTU   | followup | Otu0109 (Ruminococcus)                     | 0.9673 | 0.0099 |
| OTU   | followup | Otu0129 (Clostridium XIVa)                 | 0.3162 | 0.0396 |
| OTU   | followup | Otu0131 (Bacteroides)                      | 0.3433 | 0.0198 |
| OTU   | followup | Otu0167 (Oscillibacter)                    | 0.5682 | 0.0396 |
| OTU   | followup | Otu0177 (Desulfovibrio)                    | 0.2197 | 0.0297 |
| OTU   | followup | Otu0207 (Bacteria unclassified)            | 0.3231 | 0.0396 |
| OTU   | followup | Otu0288 (Clostridium XIVa)                 | 0.2372 | 0.0297 |
| OTU   | followup | Otu0363 (Lactobacillus)                    | 0.1771 | 0.0495 |
| OTU   | followup | Otu0365 (Clostridiales unclassified)       | 0.2979 | 0.0396 |
| OTU   | followup | Otu0377 (Ruminococcaceae unclassified)     | 0.2592 | 0.0495 |
| OTU   | followup | Otu0379 (Alistipes)                        | 0.2880 | 0.0198 |
| OTU   | followup | Otu0411 (Puniceococcaceae unclassified)    | 0.3351 | 0.0198 |
| OTU   | followup | Otu0433 (Clostridiales unclassified)       | 0.3092 | 0.0495 |
| OTU   | followup | Otu0464 (Lactobacillus)                    | 0.7432 | 0.0099 |
| OTU   | followup | Otu0468 (Faecalibacterium)                 | 0.2439 | 0.0495 |
| OTU   | followup | Otu0469 (Lachnospiraceae unclassified)     | 0.2551 | 0.0297 |
| OTU   | followup | Otu0524 (Clostridiales unclassified)       | 0.5059 | 0.0099 |
| OTU   | followup | Otu0527 (Erysipelotrichaceae unclassified) | 0.2762 | 0.0396 |
| OTU   | followup | Otu0631 (Clostridiales unclassified)       | 0.2584 | 0.0198 |

C. DESeq2, model: Rome III score + BMI + PD : subject + timepoint \* PD, leave-one-out loop run 62 times (list of taxa with mean adjusted  $p < 0.05$ )

| Level  | Contrast                | Taxon                               | Mean log2 fold change | SD for log2 fold change | Mean adjusted p-value | SD for adjusted p-value |
|--------|-------------------------|-------------------------------------|-----------------------|-------------------------|-----------------------|-------------------------|
| Family | PD vs C, baseline       | Porphyromonadaceae                  | -2.9176               | 0.1300                  | 0.0031                | 0.0006                  |
| Family | PD vs C, baseline       | Prevotellaceae                      | -7.4107               | 0.2141                  | 0.0018                | 0.0006                  |
| Family | PD vs C, baseline       | Veillonellaceae                     | -6.5409               | 0.9537                  | 0.0164                | 0.1259                  |
| Family | PD vs C, followup       | Porphyromonadaceae                  | -2.7642               | 0.1283                  | 0.0058                | 0.0011                  |
| Family | PD vs C, followup       | Prevotellaceae                      | -7.4819               | 0.2080                  | 0.0015                | 0.0006                  |
| Family | PD vs C, followup       | Veillonellaceae                     | -7.0958               | 0.9588                  | 0.0162                | 0.1268                  |
| Family | Rome III 9-15 sum score | Bifidobacteriaceae                  | 0.1881                | 0.0040                  | 0.0002                | 0.0002                  |
| Family | BMI                     | Clostridiaceae_1                    | 0.7520                | 0.0206                  | 0.0000                | 0.0000                  |
| Genus  | PD vs C, baseline       | Clostridium_XIVa                    | 5.3209                | 0.1209                  | 0.0000                | 0.0000                  |
| Genus  | PD vs C, baseline       | Clostridium_XVIII                   | -7.2388               | 1.1429                  | 0.0428                | 0.1221                  |
| Genus  | PD vs C, baseline       | Dialister                           | -11.3419              | 1.4701                  | 0.0161                | 0.1267                  |
| Genus  | PD vs C, baseline       | Prevotella                          | -6.1119               | 0.1148                  | 0.0417                | 0.0085                  |
| Genus  | PD vs C, baseline       | Romboutsia                          | 6.5350                | 0.4349                  | 0.0294                | 0.0064                  |
| Genus  | PD vs C, followup       | Clostridium_IV                      | 2.7394                | 0.0838                  | 0.0489                | 0.0126                  |
| Genus  | PD vs C, followup       | Clostridium_XIVa                    | 5.0995                | 0.1180                  | 0.0000                | 0.0000                  |
| Genus  | PD vs C, followup       | Dialister                           | -11.0257              | 1.4695                  | 0.0161                | 0.1265                  |
| Genus  | PD vs C, followup       | Prevotella                          | -6.2879               | 0.1085                  | 0.0432                | 0.0044                  |
| Genus  | PD vs C, followup       | Romboutsia                          | 6.3534                | 0.4442                  | 0.0431                | 0.0064                  |
| Genus  | Rome III 9-15 sum score | Bifidobacterium                     | 0.1903                | 0.0050                  | 0.0006                | 0.0011                  |
| Genus  | BMI                     | Clostridium_sensu_stricto           | 0.7635                | 0.0198                  | 0.0000                | 0.0000                  |
| Genus  | BMI                     | Coprococcus                         | -0.3734               | 0.0126                  | 0.0051                | 0.0046                  |
| OTU    | PD vs C, baseline       | Otu0062 (Blautia)                   | -4.3308               | 0.1274                  | 0.0485                | 0.0076                  |
| OTU    | PD vs C, baseline       | Otu0264 (Butyrivibrio)              | -9.3180               | 0.0584                  | 0.0470                | 0.0064                  |
| OTU    | BMI                     | Otu0051 (Clostridium_sensu_stricto) | 0.6295                | 0.0186                  | 0.0000                | 0.0001                  |
| OTU    | BMI                     | Otu0582 (Actinomyces)               | -0.2213               | 0.0164                  | 0.0192                | 0.1256                  |

**Table S5. Model significances for random forest comparisons, PD patients/control subjects**

| Level  | Timepoint | Actual Out of Box error | Out of Box error for randomly permuted data | p-value for model significance |
|--------|-----------|-------------------------|---------------------------------------------|--------------------------------|
| OTU    | baseline  | 0.375                   | 0.516                                       | 0.001                          |
| OTU    | follow-up | 0.352                   | 0.516                                       | < 0.001                        |
| Genus  | baseline  | 0.430                   | 0.508                                       | 0.045                          |
| Genus  | follow-up | 0.328                   | 0.516                                       | < 0.001                        |
| Family | baseline  | 0.391                   | 0.516                                       | 0.005                          |
| Family | follow-up | 0.430                   | 0.516                                       | 0.046                          |

**Table S6. Differential abundance comparison results for disease progression (within the PD patient group)**

**A. ANCOM (list of all differentially abundant taxa)**

| Level | Timepoint | Taxon                                  |
|-------|-----------|----------------------------------------|
| OTU   | followup  | Otu0148 (Bifidobacterium)              |
| OTU   | followup  | Otu0327 (Lachnospiraceae unclassified) |

**B. Random forests (list of taxa with  $p < 0.05$  for mean decrease in Gini)**

| Level  | Timepoint | Taxon              | Mean decrease in Gini | p-value for mean decrease in Gini |
|--------|-----------|--------------------|-----------------------|-----------------------------------|
| Family | baseline  | Eubacteriaceae     | 0.9975                | 0.0297                            |
| Family | baseline  | Streptococcaceae   | 1.7012                | 0.0099                            |
| Family | baseline  | Synergistaceae     | 0.8288                | 0.0495                            |
| Family | followup  | Actinomycetaceae   | 1.3350                | 0.0297                            |
| Family | followup  | Anaeroplasmataceae | 0.9584                | 0.0099                            |
| Genus  | baseline  | Anaerotruncus      | 0.7630                | 0.0396                            |
| Genus  | baseline  | Cloacibacillus     | 0.3297                | 0.0396                            |
| Genus  | baseline  | Eubacterium        | 0.6376                | 0.0099                            |
| Genus  | baseline  | Intestinimonas     | 0.7467                | 0.0297                            |
| Genus  | followup  | Actinomyces        | 0.6551                | 0.0396                            |
| Genus  | followup  | Asteroleplasma     | 0.2929                | 0.0495                            |
| Genus  | followup  | Gordonibacter      | 0.2688                | 0.0198                            |
| Genus  | followup  | Rothia             | 0.3762                | 0.0297                            |

|       |          |                                            |        |        |
|-------|----------|--------------------------------------------|--------|--------|
| Genus | followup | Solobacterium                              | 0.3533 | 0.0099 |
| OTU   | baseline | Otu0002 (Ruminococcaceae unclassified)     | 0.2327 | 0.0396 |
| OTU   | baseline | Otu0038 (Clostridiales unclassified)       | 0.2875 | 0.0099 |
| OTU   | baseline | Otu0049 (Ruminococcaceae unclassified)     | 0.2246 | 0.0396 |
| OTU   | baseline | Otu0103 (Ruminococcaceae unclassified)     | 0.1077 | 0.0198 |
| OTU   | baseline | Otu0111 (Streptococcus)                    | 0.2119 | 0.0495 |
| OTU   | baseline | Otu0118 (Ruminococcaceae unclassified)     | 0.4181 | 0.0099 |
| OTU   | baseline | Otu0128 (Ruminococcus)                     | 0.2082 | 0.0396 |
| OTU   | baseline | Otu0144 (Ruminococcus2)                    | 0.2074 | 0.0297 |
| OTU   | baseline | Otu0149 (Ruminococcaceae unclassified)     | 0.1681 | 0.0198 |
| OTU   | baseline | Otu0166 (Ruminococcaceae unclassified)     | 0.2732 | 0.0198 |
| OTU   | baseline | Otu0171 (Bacteria unclassified)            | 0.2565 | 0.0198 |
| OTU   | baseline | Otu0191 (Rhodospirillales unclassified)    | 0.3109 | 0.0198 |
| OTU   | baseline | Otu0257 (Streptococcus)                    | 0.3098 | 0.0198 |
| OTU   | baseline | Otu0318 (Clostridium IV)                   | 0.1754 | 0.0297 |
| OTU   | baseline | Otu0327 (Lachnospiraceae unclassified)     | 0.1638 | 0.0495 |
| OTU   | baseline | Otu0343 (Mollicutes unclassified)          | 0.0818 | 0.0495 |
| OTU   | baseline | Otu0365 (Clostridiales unclassified)       | 0.2320 | 0.0297 |
| OTU   | baseline | Otu0377 (Ruminococcaceae unclassified)     | 0.3272 | 0.0099 |
| OTU   | baseline | Otu0443 (Clostridiales unclassified)       | 0.2697 | 0.0099 |
| OTU   | baseline | Otu0497 (Clostridiales unclassified)       | 0.1116 | 0.0396 |
| OTU   | baseline | Otu0514 (Clostridiales unclassified)       | 0.5542 | 0.0099 |
| OTU   | baseline | Otu0534 (Ruminococcaceae unclassified)     | 0.1268 | 0.0396 |
| OTU   | followup | Otu0049 (Ruminococcaceae unclassified)     | 0.1822 | 0.0297 |
| OTU   | followup | Otu0084 (Clostridium IV)                   | 0.4822 | 0.0099 |
| OTU   | followup | Otu0115 (Lachnospiraceae unclassified)     | 0.5202 | 0.0099 |
| OTU   | followup | Otu0118 (Ruminococcaceae unclassified)     | 0.2262 | 0.0396 |
| OTU   | followup | Otu0148 (Bifidobacterium)                  | 0.2823 | 0.0099 |
| OTU   | followup | Otu0166 (Ruminococcaceae unclassified)     | 0.1455 | 0.0396 |
| OTU   | followup | Otu0168 (Lachnospiraceae unclassified)     | 0.1419 | 0.0396 |
| OTU   | followup | Otu0208 (Anaerotruncus)                    | 0.1374 | 0.0495 |
| OTU   | followup | Otu0241 (Clostridiales unclassified)       | 0.1739 | 0.0396 |
| OTU   | followup | Otu0307 (Firmicutes unclassified)          | 0.4191 | 0.0099 |
| OTU   | followup | Otu0327 (Lachnospiraceae unclassified)     | 0.4636 | 0.0099 |
| OTU   | followup | Otu0334 (Ruminococcus)                     | 0.1260 | 0.0198 |
| OTU   | followup | Otu0350 (Deltaproteobacteria unclassified) | 0.2977 | 0.0297 |
| OTU   | followup | Otu0413 (Ruminococcaceae unclassified)     | 0.4714 | 0.0099 |
| OTU   | followup | Otu0513 (Anaerotruncus)                    | 0.1884 | 0.0297 |

**C. DESeq2, model: COMT inhibitor use + Progression, run separately for baseline and follow-up (list of taxa with adjusted p < 0.05)**

| Level  | Timepoint | Taxon                 | Variable       | Log2 fold change | SE for log2 fold change | p-value | Adjusted p-value |
|--------|-----------|-----------------------|----------------|------------------|-------------------------|---------|------------------|
| Family | baseline  | Streptococcaceae      | Progression    | 2.2304           | 0.5388                  | 0.0000  | 0.0013           |
| Family | baseline  | Enterococcaceae       | COMT inhibitor | 14.6724          | 4.6902                  | 0.0018  | 0.0351           |
| Family | baseline  | Peptostreptococcaceae | COMT inhibitor | -2.9684          | 0.9556                  | 0.0019  | 0.0351           |
| Family | followup  | Anaeroplasmataceae    | Progression    | 7.5962           | 1.3797                  | 0.0000  | 0.0000           |
| Family | followup  | Oxalobacteraceae      | Progression    | -2.7586          | 0.9027                  | 0.0022  | 0.0277           |
| Family | followup  | Prevotellaceae        | Progression    | -4.8780          | 1.0187                  | 0.0000  | 0.0000           |
| Family | followup  | Verrucomicrobiaceae   | Progression    | -2.2722          | 0.7763                  | 0.0034  | 0.0316           |
| Family | followup  | Lachnospiraceae       | COMT inhibitor | -1.5118          | 0.3315                  | 0.0000  | 0.0001           |
| Family | followup  | Lactobacillaceae      | COMT inhibitor | 6.2970           | 0.9224                  | 0.0000  | 0.0000           |
| Family | followup  | Ruminococcaceae       | COMT inhibitor | -1.0925          | 0.2406                  | 0.0000  | 0.0001           |
| Genus  | baseline  | Bacteroides           | Progression    | -1.4539          | 0.3999                  | 0.0003  | 0.0062           |
| Genus  | baseline  | Butyrivibrio          | Progression    | -6.9646          | 1.5433                  | 0.0000  | 0.0003           |
| Genus  | baseline  | Prevotella            | Progression    | -5.4929          | 0.9468                  | 0.0000  | 0.0000           |
| Genus  | baseline  | Streptococcus         | Progression    | 2.3720           | 0.5761                  | 0.0000  | 0.0011           |
| Genus  | baseline  | Acidaminococcus       | COMT inhibitor | 7.0703           | 2.2314                  | 0.0015  | 0.0345           |
| Genus  | baseline  | Eisenbergiella        | COMT inhibitor | -4.7103          | 1.3328                  | 0.0004  | 0.0184           |
| Genus  | baseline  | Enterococcus          | COMT inhibitor | 15.3872          | 4.6896                  | 0.0010  | 0.0310           |
| Genus  | baseline  | Megasphaera           | COMT inhibitor | 12.2362          | 2.1570                  | 0.0000  | 0.0000           |
| Genus  | followup  | Acidaminococcus       | Progression    | -8.2094          | 2.1291                  | 0.0001  | 0.0026           |
| Genus  | followup  | Akkermansia           | Progression    | -2.4095          | 0.7950                  | 0.0024  | 0.0314           |
| Genus  | followup  | Asteroleplasma        | Progression    | 8.2036           | 1.5868                  | 0.0000  | 0.0000           |
| Genus  | followup  | Coprobacter           | Progression    | -5.0996          | 1.2890                  | 0.0001  | 0.0023           |
| Genus  | followup  | Desulfovibrio         | Progression    | -4.6355          | 1.3998                  | 0.0009  | 0.0139           |
| Genus  | followup  | Eisenbergiella        | Progression    | 2.6567           | 0.7341                  | 0.0003  | 0.0053           |
| Genus  | followup  | Prevotella            | Progression    | -5.8420          | 1.0593                  | 0.0000  | 0.0000           |
| Genus  | followup  | Anaerostipes          | COMT inhibitor | -4.4211          | 0.7090                  | 0.0000  | 0.0000           |
| Genus  | followup  | Bifidobacterium       | COMT inhibitor | 1.9306           | 0.6254                  | 0.0020  | 0.0124           |
| Genus  | followup  | Blautia               | COMT inhibitor | -2.1822          | 0.4312                  | 0.0000  | 0.0000           |
| Genus  | followup  | Clostridium_XIVb      | COMT inhibitor | 1.8533           | 0.6484                  | 0.0043  | 0.0229           |
| Genus  | followup  | Faecalibacterium      | COMT inhibitor | -1.6108          | 0.4876                  | 0.0010  | 0.0068           |

|       |          |                  |                |          |        |        |        |
|-------|----------|------------------|----------------|----------|--------|--------|--------|
| Genus | followup | Fusicatenibacter | COMT inhibitor | -2.3327  | 0.5848 | 0.0001 | 0.0007 |
| Genus | followup | Lactobacillus    | COMT inhibitor | 6.3846   | 0.9494 | 0.0000 | 0.0000 |
| Genus | followup | Veillonella      | COMT inhibitor | 3.0341   | 0.9146 | 0.0009 | 0.0068 |
| OTU   | baseline | Otu0016          | Progression    | 2.8073   | 0.8665 | 0.0012 | 0.0446 |
| OTU   | baseline | Otu0042          | Progression    | -5.8168  | 1.2271 | 0.0000 | 0.0003 |
| OTU   | baseline | Otu0047          | Progression    | -6.6654  | 1.5384 | 0.0000 | 0.0012 |
| OTU   | baseline | Otu0055          | Progression    | -7.3650  | 1.7079 | 0.0000 | 0.0012 |
| OTU   | baseline | Otu0085          | Progression    | -11.3475 | 1.6944 | 0.0000 | 0.0000 |
| OTU   | baseline | Otu0093          | Progression    | -6.8446  | 1.7265 | 0.0001 | 0.0039 |
| OTU   | baseline | Otu0111          | Progression    | 2.4497   | 0.6455 | 0.0001 | 0.0069 |
| OTU   | baseline | Otu0115          | Progression    | -3.7606  | 1.0709 | 0.0004 | 0.0185 |
| OTU   | baseline | Otu0222          | Progression    | -8.6971  | 2.0797 | 0.0000 | 0.0018 |
| OTU   | baseline | Otu0268          | Progression    | -24.0220 | 2.3727 | 0.0000 | 0.0000 |
| OTU   | baseline | Otu0011          | COMT inhibitor | -5.2452  | 1.3947 | 0.0002 | 0.0043 |
| OTU   | baseline | Otu0019          | COMT inhibitor | 4.7897   | 1.4594 | 0.0010 | 0.0176 |
| OTU   | baseline | Otu0024          | COMT inhibitor | -2.6349  | 0.6991 | 0.0002 | 0.0043 |
| OTU   | baseline | Otu0039          | COMT inhibitor | -6.9875  | 1.9935 | 0.0005 | 0.0102 |
| OTU   | baseline | Otu0059          | COMT inhibitor | 2.4123   | 0.8086 | 0.0029 | 0.0378 |
| OTU   | baseline | Otu0069          | COMT inhibitor | -10.1463 | 2.3166 | 0.0000 | 0.0005 |
| OTU   | baseline | Otu0085          | COMT inhibitor | 12.7473  | 2.3013 | 0.0000 | 0.0000 |
| OTU   | baseline | Otu0099          | COMT inhibitor | 8.0118   | 1.6987 | 0.0000 | 0.0001 |
| OTU   | baseline | Otu0101          | COMT inhibitor | -8.3667  | 2.6589 | 0.0017 | 0.0257 |
| OTU   | baseline | Otu0104          | COMT inhibitor | -7.3597  | 2.1517 | 0.0006 | 0.0127 |
| OTU   | baseline | Otu0110          | COMT inhibitor | -9.1313  | 2.2677 | 0.0001 | 0.0020 |
| OTU   | baseline | Otu0143          | COMT inhibitor | -4.3970  | 1.3323 | 0.0010 | 0.0173 |
| OTU   | baseline | Otu0155          | COMT inhibitor | -23.0171 | 2.2671 | 0.0000 | 0.0000 |
| OTU   | baseline | Otu0176          | COMT inhibitor | -22.2416 | 3.3225 | 0.0000 | 0.0000 |
| OTU   | baseline | Otu0186          | COMT inhibitor | -6.6298  | 1.4939 | 0.0000 | 0.0005 |
| OTU   | baseline | Otu0187          | COMT inhibitor | -23.7646 | 2.6369 | 0.0000 | 0.0000 |
| OTU   | baseline | Otu0198          | COMT inhibitor | 8.1260   | 2.6027 | 0.0018 | 0.0268 |
| OTU   | baseline | Otu0202          | COMT inhibitor | 5.7241   | 1.1807 | 0.0000 | 0.0001 |
| OTU   | baseline | Otu0241          | COMT inhibitor | -3.3951  | 1.0180 | 0.0009 | 0.0161 |
| OTU   | baseline | Otu0242          | COMT inhibitor | 13.5512  | 3.0746 | 0.0000 | 0.0005 |
| OTU   | baseline | Otu0247          | COMT inhibitor | -7.3819  | 2.4385 | 0.0025 | 0.0345 |
| OTU   | baseline | Otu0294          | COMT inhibitor | 2.2845   | 0.5957 | 0.0001 | 0.0041 |
| OTU   | baseline | Otu0365          | COMT inhibitor | -5.5055  | 1.6124 | 0.0006 | 0.0127 |
| OTU   | baseline | Otu0373          | COMT inhibitor | 7.0607   | 2.1663 | 0.0011 | 0.0182 |
| OTU   | baseline | Otu0376          | COMT inhibitor | 2.5103   | 0.6663 | 0.0002 | 0.0043 |
| OTU   | baseline | Otu0495          | COMT inhibitor | -5.0187  | 1.3499 | 0.0002 | 0.0048 |
| OTU   | baseline | Otu0501          | COMT inhibitor | 12.3303  | 4.2170 | 0.0035 | 0.0442 |
| OTU   | baseline | Otu0631          | COMT inhibitor | -5.3586  | 1.7731 | 0.0025 | 0.0345 |
| OTU   | followup | Otu0013          | Progression    | -2.4057  | 0.7950 | 0.0025 | 0.0319 |
| OTU   | followup | Otu0019          | Progression    | -5.9334  | 1.2445 | 0.0000 | 0.0001 |
| OTU   | followup | Otu0042          | Progression    | -6.8500  | 1.2983 | 0.0000 | 0.0000 |
| OTU   | followup | Otu0063          | Progression    | 7.8017   | 1.8072 | 0.0000 | 0.0006 |
| OTU   | followup | Otu0064          | Progression    | -1.9876  | 0.6878 | 0.0039 | 0.0477 |
| OTU   | followup | Otu0068          | Progression    | -6.2879  | 1.5805 | 0.0001 | 0.0017 |
| OTU   | followup | Otu0082          | Progression    | 8.6731   | 1.6667 | 0.0000 | 0.0000 |
| OTU   | followup | Otu0084          | Progression    | 2.1085   | 0.4881 | 0.0000 | 0.0006 |
| OTU   | followup | Otu0101          | Progression    | -7.5085  | 2.1010 | 0.0004 | 0.0076 |
| OTU   | followup | Otu0110          | Progression    | -4.8578  | 1.5237 | 0.0014 | 0.0200 |
| OTU   | followup | Otu0115          | Progression    | 3.5482   | 1.0654 | 0.0009 | 0.0143 |
| OTU   | followup | Otu0119          | Progression    | 5.8315   | 1.7543 | 0.0009 | 0.0143 |
| OTU   | followup | Otu0126          | Progression    | -3.9484  | 1.2698 | 0.0019 | 0.0251 |
| OTU   | followup | Otu0143          | Progression    | 2.7370   | 0.7704 | 0.0004 | 0.0077 |
| OTU   | followup | Otu0222          | Progression    | -23.9397 | 2.5737 | 0.0000 | 0.0000 |
| OTU   | followup | Otu0233          | Progression    | -9.9412  | 2.3033 | 0.0000 | 0.0006 |
| OTU   | followup | Otu0234          | Progression    | -9.8729  | 2.3076 | 0.0000 | 0.0006 |
| OTU   | followup | Otu0241          | Progression    | 2.5117   | 0.7870 | 0.0014 | 0.0200 |
| OTU   | followup | Otu0242          | Progression    | 10.2636  | 2.4860 | 0.0000 | 0.0011 |
| OTU   | followup | Otu0268          | Progression    | -7.3194  | 2.1005 | 0.0005 | 0.0093 |
| OTU   | followup | Otu0276          | Progression    | -9.9660  | 2.4845 | 0.0001 | 0.0016 |
| OTU   | followup | Otu0290          | Progression    | -9.6014  | 1.8404 | 0.0000 | 0.0000 |
| OTU   | followup | Otu0327          | Progression    | 5.9307   | 1.8058 | 0.0010 | 0.0157 |
| OTU   | followup | Otu0352          | Progression    | -4.8888  | 1.2836 | 0.0001 | 0.0032 |
| OTU   | followup | Otu0372          | Progression    | -8.2235  | 1.8753 | 0.0000 | 0.0006 |
| OTU   | followup | Otu0380          | Progression    | 4.7922   | 1.4416 | 0.0009 | 0.0143 |
| OTU   | followup | Otu0008          | COMT inhibitor | -2.1117  | 0.5889 | 0.0003 | 0.0055 |
| OTU   | followup | Otu0009          | COMT inhibitor | 2.4230   | 0.6906 | 0.0005 | 0.0067 |
| OTU   | followup | Otu0024          | COMT inhibitor | -3.2557  | 0.5675 | 0.0000 | 0.0000 |
| OTU   | followup | Otu0032          | COMT inhibitor | -2.4835  | 0.7887 | 0.0016 | 0.0200 |
| OTU   | followup | Otu0044          | COMT inhibitor | -3.3051  | 0.5821 | 0.0000 | 0.0000 |
| OTU   | followup | Otu0050          | COMT inhibitor | -2.2623  | 0.7296 | 0.0019 | 0.0212 |



|     |          |         |                |          |        |        |        |
|-----|----------|---------|----------------|----------|--------|--------|--------|
| OTU | followup | Otu0059 | COMT inhibitor | 3.0547   | 0.6541 | 0.0000 | 0.0001 |
| OTU | followup | Otu0062 | COMT inhibitor | -1.7837  | 0.5845 | 0.0023 | 0.0242 |
| OTU | followup | Otu0063 | COMT inhibitor | -5.7782  | 2.0539 | 0.0049 | 0.0429 |
| OTU | followup | Otu0079 | COMT inhibitor | -2.8382  | 0.9852 | 0.0040 | 0.0370 |
| OTU | followup | Otu0085 | COMT inhibitor | 8.3285   | 2.2797 | 0.0003 | 0.0046 |
| OTU | followup | Otu0091 | COMT inhibitor | -6.8719  | 2.3628 | 0.0036 | 0.0348 |
| OTU | followup | Otu0102 | COMT inhibitor | -3.3131  | 0.6084 | 0.0000 | 0.0000 |
| OTU | followup | Otu0108 | COMT inhibitor | 3.4233   | 0.9921 | 0.0006 | 0.0080 |
| OTU | followup | Otu0120 | COMT inhibitor | 7.9010   | 1.7697 | 0.0000 | 0.0003 |
| OTU | followup | Otu0134 | COMT inhibitor | -8.8668  | 2.1189 | 0.0000 | 0.0009 |
| OTU | followup | Otu0144 | COMT inhibitor | -4.8371  | 0.9568 | 0.0000 | 0.0000 |
| OTU | followup | Otu0180 | COMT inhibitor | 3.5899   | 1.1134 | 0.0013 | 0.0168 |
| OTU | followup | Otu0193 | COMT inhibitor | -3.0498  | 0.8514 | 0.0003 | 0.0055 |
| OTU | followup | Otu0198 | COMT inhibitor | -8.6485  | 2.8491 | 0.0024 | 0.0242 |
| OTU | followup | Otu0204 | COMT inhibitor | 4.7010   | 0.9863 | 0.0000 | 0.0001 |
| OTU | followup | Otu0211 | COMT inhibitor | 10.5372  | 2.7682 | 0.0001 | 0.0031 |
| OTU | followup | Otu0220 | COMT inhibitor | -4.6801  | 1.6469 | 0.0045 | 0.0408 |
| OTU | followup | Otu0222 | COMT inhibitor | -22.4018 | 2.8757 | 0.0000 | 0.0000 |
| OTU | followup | Otu0230 | COMT inhibitor | -7.1293  | 2.3432 | 0.0023 | 0.0242 |
| OTU | followup | Otu0233 | COMT inhibitor | 7.8927   | 2.5283 | 0.0018 | 0.0203 |
| OTU | followup | Otu0234 | COMT inhibitor | 9.6217   | 2.5323 | 0.0001 | 0.0031 |
| OTU | followup | Otu0235 | COMT inhibitor | 9.2444   | 2.4799 | 0.0002 | 0.0038 |
| OTU | followup | Otu0242 | COMT inhibitor | 10.5127  | 2.7636 | 0.0001 | 0.0031 |
| OTU | followup | Otu0267 | COMT inhibitor | 8.0190   | 1.5866 | 0.0000 | 0.0000 |
| OTU | followup | Otu0272 | COMT inhibitor | 1.9965   | 0.5419 | 0.0002 | 0.0043 |
| OTU | followup | Otu0276 | COMT inhibitor | 10.4602  | 2.7321 | 0.0001 | 0.0031 |
| OTU | followup | Otu0282 | COMT inhibitor | -2.8771  | 0.9151 | 0.0017 | 0.0200 |
| OTU | followup | Otu0294 | COMT inhibitor | 1.7015   | 0.5088 | 0.0008 | 0.0114 |
| OTU | followup | Otu0316 | COMT inhibitor | 5.4754   | 1.0619 | 0.0000 | 0.0000 |
| OTU | followup | Otu0320 | COMT inhibitor | 2.7021   | 0.7130 | 0.0002 | 0.0031 |
| OTU | followup | Otu0325 | COMT inhibitor | -23.1865 | 2.6674 | 0.0000 | 0.0000 |
| OTU | followup | Otu0342 | COMT inhibitor | 3.3322   | 1.1290 | 0.0032 | 0.0311 |
| OTU | followup | Otu0363 | COMT inhibitor | 4.8029   | 1.5351 | 0.0018 | 0.0203 |
| OTU | followup | Otu0372 | COMT inhibitor | 5.7476   | 2.0451 | 0.0049 | 0.0429 |
| OTU | followup | Otu0380 | COMT inhibitor | 5.0476   | 1.5999 | 0.0016 | 0.0200 |
| OTU | followup | Otu0464 | COMT inhibitor | 6.7036   | 1.6392 | 0.0000 | 0.0012 |
| OTU | followup | Otu0634 | COMT inhibitor | 4.9226   | 1.4008 | 0.0004 | 0.0067 |

**Table S7. Model significances for random forest comparisons, progressed/stable PD patients**

| Level  | Timepoint | Actual Out of Box error | Out of Box error for randomly permuted data | <i>p</i> -value for model significance |
|--------|-----------|-------------------------|---------------------------------------------|----------------------------------------|
| Family | baseline  | 0.286                   | 0.286                                       | 0.232                                  |
| Family | follow-up | 0.321                   | 0.286                                       | 0.798                                  |
| Genus  | baseline  | 0.304                   | 0.286                                       | 0.660                                  |
| Genus  | follow-up | 0.321                   | 0.286                                       | 0.910                                  |
| OTU    | baseline  | 0.304                   | 0.286                                       | 0.728                                  |
| OTU    | follow-up | 0.268                   | 0.286                                       | 0.044                                  |

**Table S8. Differential abundance comparison results for disease phenotype (TD vs PIGD; within the PD patient group)**

**A. ANCOM (list of all differentially abundant taxa)**

| Level | Timepoint | Taxon   |
|-------|-----------|---------|
| OTU   | baseline  | Otu0048 |
| OTU   | baseline  | Otu0170 |

**B. DESeq2, run separately for baseline and follow-up (list of taxa with adjusted *p* < 0.05)**

| Level  | Timepoint | Taxon              | Log2 fold change | SE for log2 fold change | <i>p</i> -value | Adjusted <i>p</i> -value |
|--------|-----------|--------------------|------------------|-------------------------|-----------------|--------------------------|
| Family | baseline  | Anaeroplasmataceae | -5.4442          | 1.4962                  | 0.0003          | 0.0099                   |
| Family | baseline  | Enterobacteriaceae | -2.2588          | 0.7086                  | 0.0014          | 0.0258                   |
| Family | followup  | Anaeroplasmataceae | -6.3492          | 1.5701                  | 0.0001          | 0.0019                   |
| Genus  | baseline  | Asteroleplasma     | -5.2317          | 1.6364                  | 0.0014          | 0.0242                   |
| Genus  | baseline  | Butyrivibrio       | 4.5432           | 1.0290                  | 0.0000          | 0.0009                   |

|       |          |                                                    |          |        |        |        |
|-------|----------|----------------------------------------------------|----------|--------|--------|--------|
| Genus | baseline | <i>Clostridium sensu stricto</i>                   | -2.2195  | 0.6302 | 0.0004 | 0.0129 |
| Genus | baseline | <i>Eisenbergiella</i>                              | -2.8297  | 0.8628 | 0.0010 | 0.0226 |
| Genus | baseline | <i>Gemmiger</i>                                    | 1.5637   | 0.4452 | 0.0004 | 0.0129 |
| Genus | followup | <i>Asteroleplasma</i>                              | -6.6690  | 1.7843 | 0.0002 | 0.0082 |
| Genus | followup | <i>Lactococcus</i>                                 | -3.1747  | 0.8414 | 0.0002 | 0.0082 |
| OTU   | baseline | Otu0012 ( <i>Bacteroides</i> )                     | 1.8238   | 0.5327 | 0.0006 | 0.0246 |
| OTU   | baseline | Otu0019 ( <i>Prevotella</i> )                      | -3.0993  | 0.8683 | 0.0004 | 0.0160 |
| OTU   | baseline | Otu0031 ( <i>Escherichia/Shigella</i> )            | -2.6344  | 0.7969 | 0.0009 | 0.0273 |
| OTU   | baseline | Otu0047 ( <i>Butyrivibrio</i> )                    | 4.5339   | 1.0628 | 0.0000 | 0.0024 |
| OTU   | baseline | Otu0063 ( <i>Acidaminococcaceae</i> unclassified)  | 6.4045   | 1.7359 | 0.0002 | 0.0134 |
| OTU   | baseline | Otu0082 ( <i>Asteroleplasma</i> )                  | -5.5362  | 1.6691 | 0.0009 | 0.0273 |
| OTU   | baseline | Otu0093 ( <i>Clostridiales</i> unclassified)       | 6.3962   | 1.2701 | 0.0000 | 0.0001 |
| OTU   | baseline | Otu0115 ( <i>Lachnospiraceae</i> unclassified)     | 5.4087   | 0.9346 | 0.0000 | 0.0000 |
| OTU   | baseline | Otu0178 ( <i>Bacteria</i> unclassified)            | 7.0462   | 1.8853 | 0.0002 | 0.0133 |
| OTU   | baseline | Otu0197 ( <i>Deltaproteobacteria</i> unclassified) | -3.6637  | 1.1336 | 0.0012 | 0.0314 |
| OTU   | baseline | Otu0242 ( <i>Bifidobacterium</i> )                 | -8.4058  | 2.5419 | 0.0009 | 0.0273 |
| OTU   | baseline | Otu0284 ( <i>Clostridiales</i> unclassified)       | 6.3742   | 1.6772 | 0.0001 | 0.0129 |
| OTU   | baseline | Otu0360 ( <i>Lachnospiraceae</i> unclassified)     | -1.4431  | 0.4021 | 0.0003 | 0.0160 |
| OTU   | baseline | Otu0391 ( <i>Lachnospiraceae</i> unclassified)     | 4.5159   | 1.3712 | 0.0010 | 0.0273 |
| OTU   | followup | Otu0013 ( <i>Akkermansia</i> )                     | 2.2667   | 0.6439 | 0.0004 | 0.0154 |
| OTU   | followup | Otu0053 ( <i>Clostridium XIVa</i> )                | -1.7338  | 0.5510 | 0.0017 | 0.0394 |
| OTU   | followup | Otu0069 ( <i>Ruminococcaceae</i> unclassified)     | -4.4629  | 1.3742 | 0.0012 | 0.0379 |
| OTU   | followup | Otu0082 ( <i>Asteroleplasma</i> )                  | -7.0719  | 1.8718 | 0.0002 | 0.0090 |
| OTU   | followup | Otu0085 ( <i>Porphyromonadaceae</i> unclassified)  | -5.3911  | 1.6922 | 0.0014 | 0.0380 |
| OTU   | followup | Otu0091 ( <i>Barnesiella</i> )                     | -9.6673  | 1.8132 | 0.0000 | 0.0000 |
| OTU   | followup | Otu0112 ( <i>Ruminococcaceae</i> unclassified)     | 5.5904   | 1.5038 | 0.0002 | 0.0090 |
| OTU   | followup | Otu0117 ( <i>Ruminococcaceae</i> unclassified)     | 9.6231   | 1.6616 | 0.0000 | 0.0000 |
| OTU   | followup | Otu0174 ( <i>Clostridiales</i> unclassified)       | -3.7366  | 0.9992 | 0.0002 | 0.0090 |
| OTU   | followup | Otu0185 ( <i>Lachnospiraceae</i> unclassified)     | -2.4229  | 0.6878 | 0.0004 | 0.0154 |
| OTU   | followup | Otu0219 ( <i>Lachnospiraceae</i> unclassified)     | -7.3982  | 1.8968 | 0.0001 | 0.0069 |
| OTU   | followup | Otu0230 ( <i>Clostridia</i> unclassified)          | -10.1819 | 1.6834 | 0.0000 | 0.0000 |
| OTU   | followup | Otu0238 ( <i>Ruminococcaceae</i> unclassified)     | -6.9644  | 2.1916 | 0.0015 | 0.0380 |
| OTU   | followup | Otu0360 ( <i>Lachnospiraceae</i> unclassified)     | -2.0363  | 0.4695 | 0.0000 | 0.0013 |
| OTU   | followup | Otu0380 ( <i>Ruminococcaceae</i> unclassified)     | -4.4091  | 1.3826 | 0.0014 | 0.0380 |

# R code for ‘Gut microbiota in Parkinson’s disease: Temporal stability and relations to disease progression’

Velma T. E. Aho

29 April 2019

- R preamble
- Preliminary microbiota analyses: experimental controls and outlier samples
  - Number of sequence reads
  - Experimental controls
  - Suspicious patient samples
- Clinical data comparisons
  - Data import
  - Basic statistics for PD vs control
  - Measuring disease progression in PD patients
  - Comparisons between the disease progression categories
  - Final clinical data table
- Dietary data analyses (FFQ data)
  - Data setup and energy correction
  - Diet variables and PD vs control
  - Diet variables and PD progression
  - Dietary patterns with Principal Component Analysis
- Microbiota data: setup and basics
  - Metadata and collinearity / confounders
  - Data setup
  - Basic statistics and plots of data
  - Enterotypes
- Alpha diversity analyses
  - PD vs control
  - Progression
  - PD phenotypes (TD vs PIGD)
  - Diet
- Beta diversity analyses
  - PD vs control
  - Diet
  - Progression
  - PD phenotypes (TD vs PIGD)
- Differential abundance
  - PD vs control
  - Progression
  - PD phenotypes (TD vs PIGD)
- Session info

## R preamble

Load required packages and additional scripts:

```
library("knitr")
library("kableExtra")
library("phyloseq")
library("ggplot2")
library("grid")
library("gridExtra")
library("reshape2")
library("vegan")
library("devtools")
source("Inputs/relabund_barcharts_v4.5.R")
source("Inputs/taxaLevelCollapser_v5.R")
```

```
# Figure widths:
library("measurements")
halfpage <- conv_unit(85, "mm", "inch")
fullpage <- conv_unit(170, "mm", "inch")
maxhi <- conv_unit(225, "mm", "inch")
```

## Preliminary microbiota analyses: experimental controls and outlier samples

Import the full OTU data, including experimental controls (blanks). There were three types of these: extraction blanks (blanks included during the DNA extraction protocol without template DNA), PCR blanks (blanks included during PCR without template DNA), and lambda blanks (lambda phage DNA introduced to see if it could function as a carrier for potential contaminant bacterial DNA).

```
# Metadata
basicmeta <- read.csv("Inputs/basicmeta.csv", row.names = 1)
basicmeta$Group <- factor(basicmeta$Group,
  levels = c("extract_blank", "lambda_blank", "pcr_blank", "control",
    "Parkinson"))

# 16s data
pd16s <- t(as.matrix(read.table("Inputs/pdfu_otutable.txt")))

# Taxonomy table
pdtax <- as.matrix(read.csv("Inputs/pdfu_taxtable.csv", sep = "\t", row.names = 1))

# Make a phyloseq object
pdfu_prelim <- phyloseq(otu_table(pd16s, taxa_are_rows = TRUE), tax_table(pdtax),
  sample_data(basicmeta))
```

## Number of sequence reads

Plot summary data of read counts by group:

```
read_sums <- data.frame(Reads = sample_sums(pdfu_prelim),
  Group = basicmeta$Group)

read_summary <- data.frame(levels(read_sums$Group),
  aggregate(read_sums$Reads,
    by = list(read_sums$Group),
    FUN = function(x) cbind(mean(x), median(x), sd(x), min(x),
      max(x)))$x)
colnames(read_summary)<-c("Group", "mean", "median", "sd", "min", "max")

kable(read_summary, digits = 2)
```

| Group         | mean     | median  | sd       | min  | max    |
|---------------|----------|---------|----------|------|--------|
| extract_blank | 609.00   | 168.0   | 891.37   | 154  | 1946   |
| lambda_blank  | 3276.33  | 114.0   | 14241.22 | 23   | 65423  |
| pcr_blank     | 400.22   | 109.0   | 636.79   | 32   | 1875   |
| control       | 72365.21 | 72908.5 | 34969.30 | 600  | 161050 |
| Parkinson     | 73350.79 | 72032.0 | 36509.40 | 2201 | 262621 |

Most of the experimental control samples have very few reads. The following five have over 1000:

```
kable(subset(read_sums, Group != "Parkinson" & Group != "control" & Reads > 1000))
```

|          | Reads | Group         |
|----------|-------|---------------|
| Blank1   | 1946  | extract_blank |
| Lambda20 | 65423 | lambda_blank  |

|           | Reads | Group        |
|-----------|-------|--------------|
| Lambda515 | 1011  | lambda_blank |
| PCRblank2 | 1875  | pcr_blank    |
| PCRblank5 | 1041  | pcr_blank    |

There is also one patient sample with less than 1000 reads:

```
subset(read_sums, (Group == "Parkinson" | Group == "control") & Reads < 1000)
```

```
##      Reads  Group
## C00440   600 control
```

Trim all samples with under 1000 reads (and the paired sample of the low-read patient sample):

```
pdfu_prelim <- subset_samples(pdfu_prelim, sample_sums(pdfu_prelim)>1000 &
  ((Type == "sample" & Subject != "C0044") | Type != "sample"))
```

## Experimental controls

Quick relative abundance bar charts to check what the samples look like:

```
# genus level phyloseq object:
pdfu_prelim_gen <- collapseTaxLevel(pdfu_prelim, level = "Genus", maxUnclassifiedLevel = "Family")

relAbundChart(pdfu_prelim_gen, taxaCount = 20, byVariable = "Group") +
  theme_bw() +
  scale_x_discrete(labels = c("Extract\nblank", "Lambda\nblank", "PCR\nblank", "Control\nsubject",
    "Parkinson\npatient")) +
  theme(panel.grid = element_blank(),
    axis.text = element_text(color = "black"))
```

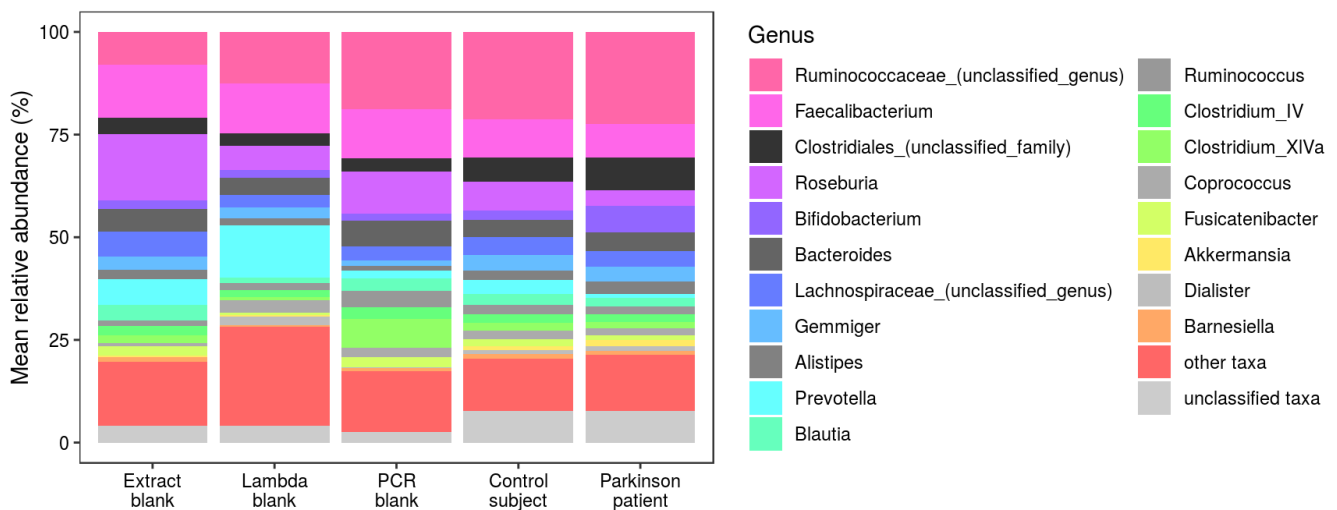

The remaining experimental control samples look very similar to the actual stool samples.

NMDS ordination (starting with the genus level) to further check where these samples fall in comparison to the actual samples:

```
pdfu_prelim_gen_R <- rarefy_even_depth(pdfu_prelim_gen, rngseed = 101125)
```

```
pdfu_prelim_gen_ord <- ordinate(pdfu_prelim_gen_R, "NMDS", "bray", try = 100)
```

```
plot_ordination(pdfu_prelim_gen_R, pdfu_prelim_gen_ord, type = "samples", color = "Type", shape =
  "Type") +
  theme_bw() +
  coord_fixed() +
  scale_color_manual(values = c("deeppink3", "gray80")) +
  theme(panel.grid = element_blank())
```

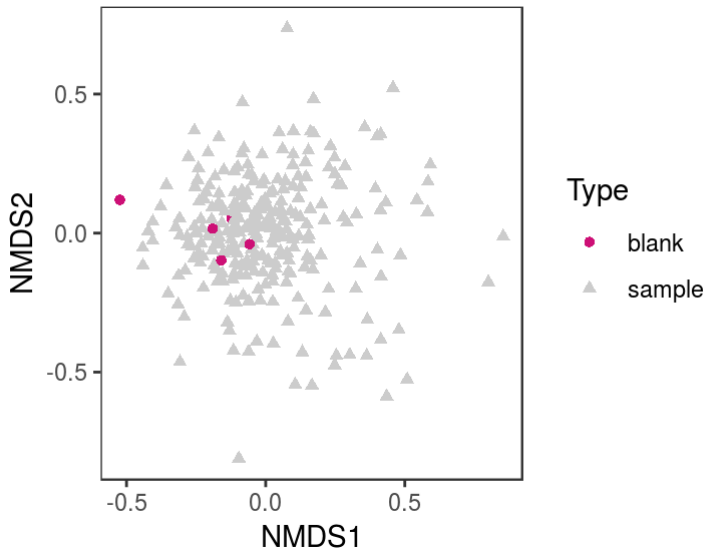

The ordination shows that the five experimental control samples with more than 1000 sequence reads have communities very similar to the stool samples. These samples represented a small subset of all experimental control samples.

```
kable(cbind(All_samples = table(basicmeta$Group), Samples_over_1000 =
  table(sample_data(pdfu_prelim)$Group)), col.names = c("All samples", "Samples with over 1000
  reads"))
```

|               | All samples | Samples with over 1000 reads |
|---------------|-------------|------------------------------|
| extract_blank | 4           | 1                            |
| lambda_blank  | 21          | 2                            |
| pcr_blank     | 9           | 2                            |
| control       | 130         | 128                          |
| Parkinson     | 136         | 136                          |

We concluded that the microbes detected in these blanks result from cross-contamination in the laboratory, and are unlikely to suggest an issue with contamination, since the bacteria detected in them represent taxa commonly detected in stool. Most of the experimental control samples have very few sequence reads (less than 500).

## Suspicious patient samples

Remove the blanks, and continue with preliminary analysis of actual patient samples:

```
pdfu_prelim_gen_trim <- subset_samples(pdfu_prelim_gen, Type != "blank")
pdfu_prelim_gen_trim_R <- rarefy_even_depth(pdfu_prelim_gen_trim, rngseed = 124659)
pdfu_prelim_gen_trim_ord <- ordinate(pdfu_prelim_gen_trim_R, "NMDS", "bray", try = 400)
```

A small set of samples had been flagged suspicious by the clinician for clinical or sampling reasons. Make a plot with these subjects' both samples colored:

```
suspicious_ord <- plot_ordination(pdfu_prelim_gen_trim_R, pdfu_prelim_gen_trim_ord,
  type = "samples", justDF = TRUE)

# Reorder to get the "suspicious" points on top:
suspicious_ord <- suspicious_ord[order(suspicious_ord$Suspicious), ]

ggplot(suspicious_ord, aes(x = NMDS1, y = NMDS2, color = Suspicious, alpha = Suspicious, shape =
  Timepoint)) +
  geom_point() +
  theme_bw() +
  coord_fixed() +
  scale_color_manual(values = c("gray50", "darkred")) +
```

```
scale_alpha_manual(values = c(0.5, 1)) +
geom_text(aes(label = Subject, x = NMDS1, y = NMDS2), size = 3, nudge_x = -0.1) +
theme(legend.position = "none", panel.grid = element_blank())
```

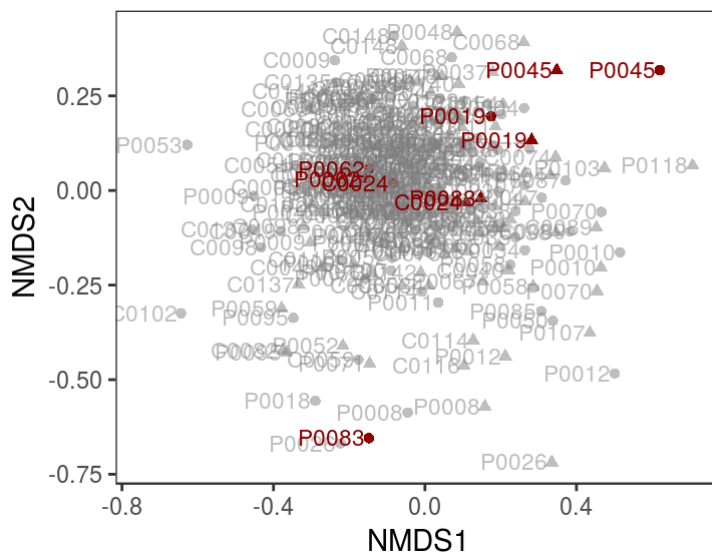

Based on this plots & clinical notes:

- C24 is OK (notes: follow-up sample tube leaked fluid during transport/storage, but the microbial communities look fairly similar in the two samples and overall not different from other samples in the plot)
- P19 is OK (notes: follow-up sample tube leaked fluid during transport/storage, but the microbial communities look fairly similar in the two samples and overall not different from other samples in the plot)
- P62 is OK (subject was excluded from pilot because of nose polyps; these are not likely to affect gut microbiota notably, and the microbial communities look similar to other samples in the plot)
- P45 is outside the main cluster, and has notes about sampling problems (patient placed samples in trash can and they were recovered some time later). Exclude.
- P83 has a large difference between samples, and has notes that mention multiple antibiotic regimens between time points. Exclude.
- Additionally, P26 has nothing special in notes, but is a PD patient and very different from all other samples. Exclude as an outlier.

One could argue for there being other samples that are as outlierish as these, but the two other samples aside from P26 have additional reasons for exclusion, and P26 seems very distinct from all other samples, so excluding it seems like the safest choice to avoid outlier effects between the PD and control groups.

To summarize:

Keep: C24, P19, P62

Exclude: P26, P45, P83

Redraw the plot with these samples highlighted:

```
# Adjust the "Suspicious" variable:
keep <- paste(rep(c("C0024", "P0019", "P0062", "P0118"), each = 2), c("0", "N"), sep = "")
drop <- paste(rep(c("P0083", "P0026", "P0045"), each = 2), c("0", "N"), sep = "")

sample_data(pdfu_prelim_gen_trim_R)[keep, "Suspicious"] <- 1
sample_data(pdfu_prelim_gen_trim_R)[drop, "Suspicious"] <- "check"
levels(sample_data(pdfu_prelim_gen_trim_R)$Suspicious) <- c("included", "excluded")

# Plot again:
ordGenSuspicious <- plot_ordination(pdfu_prelim_gen_trim_R, pdfu_prelim_gen_trim_ord, type =
  "samples", color = "Suspicious", shape = "Timepoint") +
  theme_bw() +
```

```

geom_point(size = 2) +
scale_color_manual(values = c("gray75", "firebrick")) +
geom_polygon(aes(group = Subject), size = 0.25) +
theme(legend.position = "none",
      panel.grid = element_blank(),
      panel.border = element_rect(fill = NA, size = 0.25))

# Make a nice legend:

g_legend <- function(a.gplot){
  tmp <- ggplot_gtable(ggplot_build(a.gplot))
  leg <- which(sapply(tmp$grobs, function(x) x$name) == "guide-box")
  legend <- tmp$grobs[[leg]]
  legend
}

ordLeg <- g_legend(plot_ordination(pdfu_prelim_gen_trim_R, pdfu_prelim_gen_trim_ord, type =
  "samples", color = "Suspicious", shape = "Timepoint") +
  theme_bw(base_size = 5) +
  scale_color_manual(values = c("gray50", "firebrick"), name = "Sample status") +
  scale_shape_manual(values = c(19, 17), labels = c("baseline", "follow-up")))

```

Figure 1

Plot of samples excluded based on preliminary microbiota comparisons:

```
grid.arrange(ordGenSuspicious, ordLeg, nrow = 1, widths = c(8, 2.5))
```

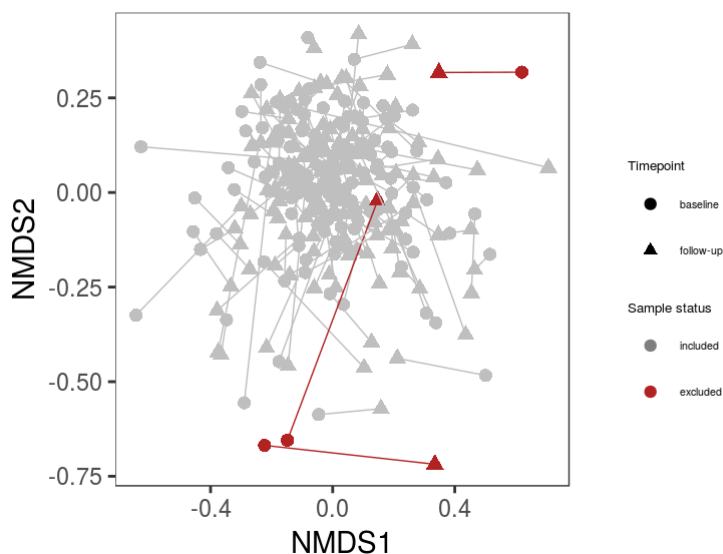

```

# Export to pdf
# (readjusting some graphical parameters)

ordGenSuspicious <- plot_ordination(pdfu_prelim_gen_trim_R, pdfu_prelim_gen_trim_ord, type =
  "samples", color = "Suspicious", shape = "Timepoint") +
  theme_bw(base_size = 8) +
  geom_point(size = 0.5) +
  coord_fixed() +
  scale_color_manual(values = c("gray75", "firebrick")) +
  geom_polygon(aes(group = Subject), size = 0.25) +
  theme(legend.position = "none",
        panel.grid = element_blank(),
        panel.border = element_rect(fill = NA, size = 0.25))

ordLeg <- g_legend(plot_ordination(pdfu_prelim_gen_trim_R, pdfu_prelim_gen_trim_ord, type =
  "samples", color = "Suspicious", shape = "Timepoint") +

```



```

theme_bw(base_size = 8) +
scale_color_manual(values = c("gray50", "firebrick"), name = "Sample status") +
scale_shape_manual(values = c(19, 17), labels = c("baseline", "follow-up"))

fig1 <- arrangeGrob(ordGenSuspicious, ordLeg, nrow = 1, widths = c(8, 2.5))

ggsave(fig1, filename = "Outputs/figure1.pdf", device = cairo_pdf,
width = 3.35, height = 2, units = "in")

```

Finally, check the same on OTU and family levels to see if these choices make sense:

```

# Genus level plot with labels

ordGenSuspicious2 <- plot_ordination(pdfu_prelim_gen_trim_R, pdfu_prelim_gen_trim_ord, type =
  "samples", color = "Suspicious") +
  theme_bw(base_size = 15) +
  scale_color_manual(values = c("gray75", "firebrick")) +
  geom_polygon(aes(group = Subject)) +
  geom_text(aes(label = Subject, x = NMDS1, y = NMDS2), size = 3, nudge_x = -0.05) +
  theme(legend.position = "none", panel.grid = element_blank())

# OTU level plot

pdfu_prelim_trim_R <- rarefy_even_depth(subset_samples(pdfu_prelim, Type == "sample"), rngseed =
  459116)

sample_data(pdfu_prelim_trim_R)$Suspicious <- sample_data(pdfu_prelim_gen_trim_R)$Suspicious

pdfu_prelim_trim_ord <- ordinate(pdfu_prelim_trim_R, "NMDS", "bray", try = 400)

ordOTUSuspicious <- plot_ordination(pdfu_prelim_trim_R, pdfu_prelim_trim_ord, type = "samples",
  color = "Suspicious") +
  theme_bw(base_size = 15) +
  scale_color_manual(values = c("gray75", "firebrick")) +
  geom_polygon(aes(group = Subject)) +
  geom_text(aes(label = Subject, x = NMDS1, y = NMDS2), size = 3, nudge_x = -0.05) +
  theme(legend.position = "none", panel.grid = element_blank())

# Family level plot

pdfu_prelim_fam_trim_R <- rarefy_even_depth(collapseTaxLevel(subset_samples(pdfu_prelim, Type ==
  "sample"), level = "Family", maxUnclassifiedLevel = "Order"), rngseed = 110199)

sample_data(pdfu_prelim_fam_trim_R)$Suspicious <- sample_data(pdfu_prelim_gen_trim_R)$Suspicious

pdfu_prelim_fam_trim_ord <- ordinate(pdfu_prelim_fam_trim_R, "NMDS", "bray", try = 400)

ordFamSuspicious <- plot_ordination(pdfu_prelim_fam_trim_R, pdfu_prelim_fam_trim_ord, type =
  "samples", color = "Suspicious") +
  theme_bw(base_size = 15) +
  scale_color_manual(values = c("gray75", "firebrick")) +
  geom_text(aes(label = Subject, x = NMDS1, y = NMDS2), size = 3, nudge_x = -0.05) +
  geom_polygon(aes(group = Subject)) +
  theme(legend.position = "none", panel.grid = element_blank())

ordLeg2 <- g_legend(plot_ordination(pdfu_prelim_gen_trim_R, pdfu_prelim_gen_trim_ord, type =
  "samples",
  color = "Suspicious") +
  theme_bw(base_size = 16) +
  scale_color_manual(values = c("gray50", "firebrick"), name = "Sample status"))

```

Draw all three plots:

```

grid.arrange(ordOTUSuspicious + ggtitle("OTUs"),
  ordLeg2,
  nrow = 1)

```

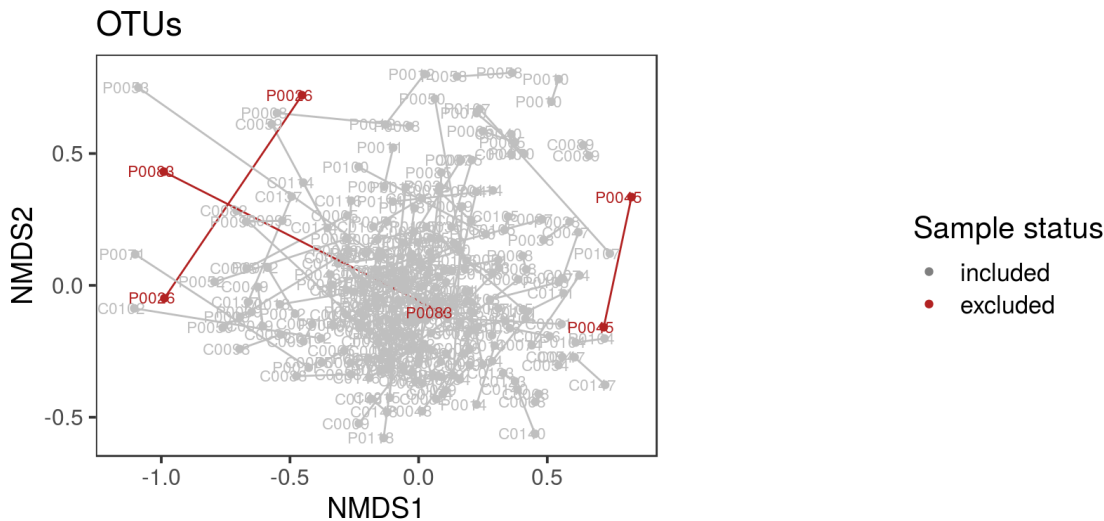

```
grid.arrange(ordGenSuspicious2 + ggtitle("Genera"),
             ordFamSuspicious + ggtitle("Families"),
             nrow = 1)
```

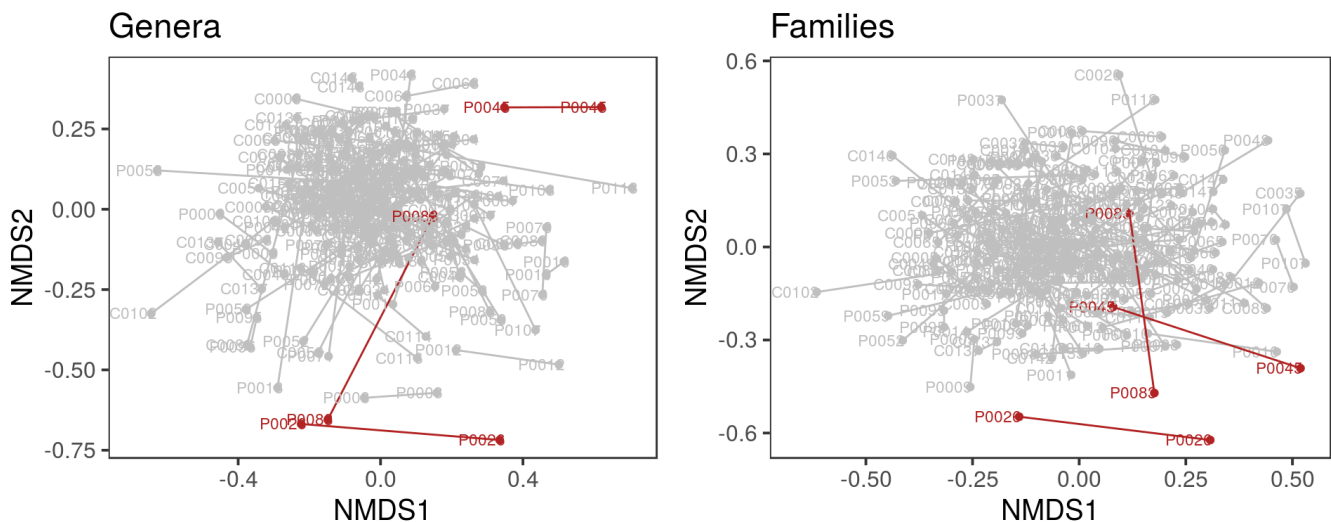

As noted before, two of the excluded subject had additional sampling-related issues that support excluding them. P26, who doesn't, seems consistently outlierish on all three levels. All excluded subjects are Parkinson's patients, and removing outlierish points from the patient group is a conservative choice that it will, if anything, lessen the differences between the patient and control groups.

## Clinical data comparisons

### Data import

Import the full clinical metadata:

```
pdclin <- read.table("Inputs/pdclin_final.txt", sep = "\t")
```

Make sure the numerous yes/no variables coded as 1/0 are factors:

```
varTypeFix <- function(df){
  for(i in 1:ncol(df)){
    var <- df[,i]
    varvals <- sort(unique(na.omit(var)))
```

```

if(length(varvals) == 2){
  if(identical(varvals, as.integer(c(0, 1))) | identical(varvals, c("0", "1")) | is.factor(var))
  {
    var <- factor(var)
  }
} else if(is.factor(var)){
  var <- factor(var)
}
df[,i] <- var
}

return(df)
}

pdclin <- varTypeFix(pdclin)

# two additional variables need to be fixed manually:
pdclin$tobacco_when_last <- factor(pdclin$tobacco_when_last)
pdclin$rasagiline_mg <- as.numeric(as.character(pdclin$rasagiline_mg))

```

Create subsets of metadata for the two timepoints:

```

metaFU <- subset(pdclin, Timepoint == "followup")
metaBL <- subset(pdclin, Timepoint == "baseline")

```

## Basic statistics for PD vs control

Because the output of the base-R summary function isn't the most handy to deal with, the metadata comparisons were done with a (somewhat clunky) custom function:

```

metaSummaryGeneric <- function(dfin, varList, groupVar, pairing = FALSE, normtest = FALSE){

  res <- as.data.frame(matrix(nrow = length(varList), ncol = 15))
  rownames(res) <- varList
  colnames(res) <- c("percent_level", paste(
    rep(c(levels(dfin[[groupVar]])[1], levels(dfin[[groupVar]])[2]), each = 6),
    rep(c("%", "Q1", "median", "mean", "Q3", "SD"), 2), sep = "_"), "pVal", "test")

  for(i in 1:length(varList)){

    df <- dfin

    if(pairing == TRUE){
      df <- subset(df, !(Subject %in% df[which(is.na(df[[varList[i]]))]), "Subject"))
    }

    var <- df[[varList[i]]]

    if(table(var)[1] == length(var) | sum(table(var)) == 0){
      res[i, 15] <- "none"
      next
    }

    varN <- subset(df, df[[groupVar]] == levels(df[[groupVar]])[1])[varList[i]]
    varP <- subset(df, df[[groupVar]] == levels(df[[groupVar]])[2])[varList[i]]

    if(is.factor(var)){
      if(sum(is.na(varN)) < length(varN) &
        length(levels(var)) == 2){
        res[i, 1] <- names(table(var)[2])
        res[i, 2] <- table(varN)[2]/length(varN)*100

```

```

        res[i, 8] <- table(varP)[2]/length(varP)*100
        res[i, 14] <- fisher.test(table(df[, c(groupVar, varList[i])]))$p
        res[i, 15] <- "fisher"
      }
    } else if(sum(is.na(varN))<length(varN)){
      res[i, 3:6] <- summary(varN)[2:5]
      res[i, 7] <- sd(varN, na.rm = TRUE)
      res[i, 9:12] <- summary(varP)[2:5]
      res[i, 13] <- sd(varP, na.rm = TRUE)
      if(normtest == TRUE & shapiro.test(var)$p.value>0.05){
        res[i, 14] <- t.test(var~df[[groupVar]])$p.value
        res[i, 15]<-"t"
      } else if(pairing == TRUE){
        res[i, 14] <- wilcox.test(var~df[[groupVar]], paired = TRUE)$p.value
        res[i, 15] <- "wilcox"
      } else {
        res[i, 14] <- wilcox.test(var~df[[groupVar]])$p.value
        res[i, 15] <- "wilcox"
      }
    }
  }
}
return(res)
}

```

The clinical comparisons at each timepoint were run with this function, with the results for age, sex, BMI and all those variables that had  $p < 0.1$  at either timepoint collected into the final table:

```

# Baseline
metaCompBL <- metaSummaryGeneric(metaBL, colnames(metaBL)[2:ncol(metaBL)], "Parkinson", normtest =
  TRUE)
metaCompDiffBL <- subset(metaCompBL, pVal<0.1)
metaCompDiffBL <- rbind(metaCompDiffBL, metaCompBL[c("gender", "age_at_stool_collection", "BMI"),])

## Follow-up
metaCompFU <- metaSummaryGeneric(metaFU, colnames(metaFU)[2:ncol(metaFU)], "Parkinson", normtest =
  TRUE)
metaCompDiffFU <- subset(metaCompFU, pVal<0.1)
metaCompDiffFU <- rbind(metaCompDiffFU, metaCompFU[c("gender", "BMI"),])

# Add variables that are only significant at the other timepoint to the results
metaCompDiffBL <- rbind(metaCompDiffBL, metaCompBL[rownames(metaCompBL) %in%
  setdiff(rownames(metaCompDiffFU), rownames(metaCompDiffBL)),])
metaCompDiffFU <- rbind(metaCompDiffFU, metaCompFU[rownames(metaCompFU) %in%
  setdiff(rownames(metaCompDiffBL), rownames(metaCompDiffFU)),])

# Combine the results
metaCompDiffBL$Timepoint <- "baseline"
metaCompDiffFU$Timepoint <- "followup"
metaCompDiffBL$Variable <- rownames(metaCompDiffBL)
metaCompDiffFU$Variable <- rownames(metaCompDiffFU)
metaCompDiff <- rbind(metaCompDiffBL, metaCompDiffFU)

# Remove variables missing entirely from baseline
metaCompDiff <- subset(metaCompDiff, !(Variable %in% subset(metaCompDiff, test == "none")$Variable))

# Additional data rearrangement and summarization
metaCompDiffExport <- metaCompDiff[order(metaCompDiff$Variable),]

# Concatenation function to combine data from various columns
summaryConcat <- function(df, vargroup){
  percvar <- paste(vargroup, "%", sep = "_")
  meanvar <- paste(vargroup, "mean", sep = "_")
  sdvar <- paste(vargroup, "SD", sep = "_")
}

```

```

q1var <- paste(vargroup, "Q1", sep = "_")
q3var <- paste(vargroup, "Q3", sep = "_")
medianvar <- paste(vargroup, "median", sep = "_")

pmmvar <- round(df[, percvar], 2)
pmmvar[df$test == "t"] <- paste(
  round(df[df$test == "t",meanvar],2), " ± ",
  round(df[df$test == "t",sdvar],2), sep = "")
pmmvar[df$test == "wilcox"] <- paste(
  round(df[df$test == "wilcox",medianvar],2), " [",
  round(df[df$test == "wilcox",q1var],2), "-",
  round(df[df$test == "wilcox",q3var],2), "]", sep="")

return(pmmvar)
}

metaCompDiffExport$control_perc_meanSD_medianIQR <- summaryConcat(metaCompDiffExport, "control")
metaCompDiffExport$Parkinson_perc_meanSD_medianIQR <- summaryConcat(metaCompDiffExport, "Parkinson")

# BMI tests as normally distributed at one time point and not the other.
# separately rerun and rearrange to use non-parametric for both timepoints
fuBMI <- which(metaCompDiffExport$Variable == "BMI" & metaCompDiffExport$Timepoint == "followup")

metaCompDiffExport[fuBMI,"pVal"] <- wilcox.test(metaFU$BMI~metaFU$Parkinson)$p.value
metaCompDiffExport[fuBMI,"test"] <- "wilcox"
metaCompDiffExport[fuBMI, "control_perc_meanSD_medianIQR"] <- paste(
  round(metaCompDiffExport[fuBMI,"control_median"], 2), " [",
  round(metaCompDiffExport[fuBMI,"control_Q1"], 2), "-",
  round(metaCompDiffExport[fuBMI,"control_Q3"], 2), "]", sep="")
metaCompDiffExport[fuBMI, "Parkinson_perc_meanSD_medianIQR"] <- paste(
  round(metaCompDiffExport[fuBMI,"Parkinson_median"], 2), " [",
  round(metaCompDiffExport[fuBMI,"Parkinson_Q1"], 2), "-",
  round(metaCompDiffExport[fuBMI,"Parkinson_Q3"], 2), "]", sep="")

# Reorder columns
metaCompDiffExport <- metaCompDiffExport[, c("Variable", "Timepoint", "percent_level",
  "control_perc_meanSD_medianIQR", "Parkinson_perc_meanSD_medianIQR", "pVal", "test")]

# leave out the mg-amount variables of drugs:
metaCompDiffExport <- metaCompDiffExport[-grep("mg",rownames(metaCompDiffExport)),]

# Save the list of differing variables for further use,
diffVarsCvsPD <- unique(metaCompDiffExport$Variable)
diffVarsCvsPD

```

```

## [1] "age_at_stool_collection"
## [2] "BMI"
## [3] "GDS_15"
## [4] "gender"
## [5] "history_TIA_ischemic_stroke"
## [6] "LED"
## [7] "meds_ACEI_ARB"
## [8] "meds_anticholinergic"
## [9] "meds_ca_antagonist"
## [10] "meds_COMT_inhibitor"
## [11] "meds_dopa"
## [12] "meds_dopamine_agonist"
## [13] "meds_MAO_inhibitor"
## [14] "meds_statin"
## [15] "meds_Warfarin"
## [16] "MMSE_total"
## [17] "NMSQuest_total"
## [18] "NMSS_total"

```

```
## [19] "RBDSQ"
## [20] "RLS"
## [21] "Rome_III_constip_defec_sumscore_9.15"
## [22] "Rome_III_IBS_criteria_fulfilled"
## [23] "SCS_PD_total"
## [24] "SDQ_total"
## [25] "sniffinsticks"
## [26] "Wexner_total"
```

**Table 3**

The results of these comparisons were exported (only first ten rows shown here):

```
rownames(metaCompDiffExport) <- NULL

kable(head(metaCompDiffExport, 10), digits = 3, col.names = c("Variable", "Timepoint", "percent
  level", "control % / meanSD / medianIQR", "Parkinson % / meanSD / medianIQR", "pVal", "test"))
```

| Variable                    | Timepoint | percent level | control % / meanSD / medianIQR | Parkinson % / meanSD / medianIQR | pVal  | test   |
|-----------------------------|-----------|---------------|--------------------------------|----------------------------------|-------|--------|
| age_at_stool_collection     | baseline  | NA            | 64.45 ± 6.9                    | 65.2 ± 5.52                      | 0.499 | t      |
| age_at_stool_collection     | followup  | NA            | 66.53 ± 6.89                   | 67.33 ± 5.51                     | 0.471 | t      |
| BMI                         | baseline  | NA            | 26.23 [24.1–28.05]             | 26.51 [24.25–29.36]              | 0.319 | wilcox |
| BMI                         | followup  | NA            | 26.94 [24.32–28.64]            | 27.24 [23.95–30.08]              | 0.572 | wilcox |
| GDS_15                      | baseline  | NA            | 1 [0–1]                        | 2 [1–4]                          | 0.000 | wilcox |
| GDS_15                      | followup  | NA            | 0 [0–1]                        | 3 [2–6]                          | 0.000 | wilcox |
| gender                      | baseline  | M             | 50                             | 51.56                            | 1.000 | fisher |
| gender                      | followup  | M             | 50                             | 51.56                            | 1.000 | fisher |
| history_TIA_ischemic_stroke | baseline  | 1             | 37.5                           | 6.25                             | 0.000 | fisher |
| history_TIA_ischemic_stroke | followup  | 1             | 37.5                           | 7.81                             | 0.000 | fisher |

```
## Export
write.csv(metaCompDiffExport, file = "Outputs/table_3.csv")
```

## Measuring disease progression in PD patients

Calculate UPDRS I to III change and create a separate table of PD-only data for progression comparisons; exclude patients on Deep Brain Stimulation (DBS == 1), those with missing values in LED or UPDRS I to III change, and those who are left unpaired after these exclusions:

```
pdclin$UPDRS_ItoIII_ON_change <- c(
  rep(NA, sum(pdclin$Parkinson == "control" & pdclin$Timepoint == "baseline")),
  rep(0, sum(pdclin$Parkinson == "Parkinson" & pdclin$Timepoint == "baseline")),
  rep(NA, sum(pdclin$Parkinson == "control" & pdclin$Timepoint == "followup")),
  subset(pdclin, Timepoint == "followup" & Parkinson == "Parkinson")[[ "UPDRS_ItoIII_ON" ]]-
  subset(pdclin, Timepoint == "baseline" & Parkinson == "Parkinson")[[ "UPDRS_ItoIII_ON" ]])

prog_change <- subset(pdclin, Parkinson == "Parkinson" & DBS != 1)
prog_change <- subset(prog_change, !is.na(prog_change$LED) &
  !is.na(prog_change$UPDRS_ItoIII_ON_change))
prog_change <- prog_change[!(prog_change$Subject %in% names(which(table(prog_change$Subject) ==
  1))), ]
```

Calculate “change per day” variables for LED and UPDRS I to III and plot the values:

```
fu_bl_change <- function(df, var){
  newvar <- rep(NA, nrow(subset(df, Timepoint == "baseline")))
  newvar <- c(newvar, (df[df$Timepoint == "followup", var]-
    df[df$Timepoint == "baseline", var])/
    df[df$Timepoint == "followup", "days_between_appointments"])
  return(newvar)
}

prog_change$LED_change_per_day <- fu_bl_change(prog_change, "LED")
prog_change$UPDRS_ItoIII_ON_change_per_day <- fu_bl_change(prog_change, "UPDRS_ItoIII_ON")
```

```
ggplot(subset(prog_change, Timepoint == "followup"),
  aes(x = LED_change_per_day, y = UPDRS_ItoIII_ON_change_per_day, label = Subject)) +
  geom_text(size = 3) +
  theme_bw() +
  theme(panel.grid = element_blank())
```

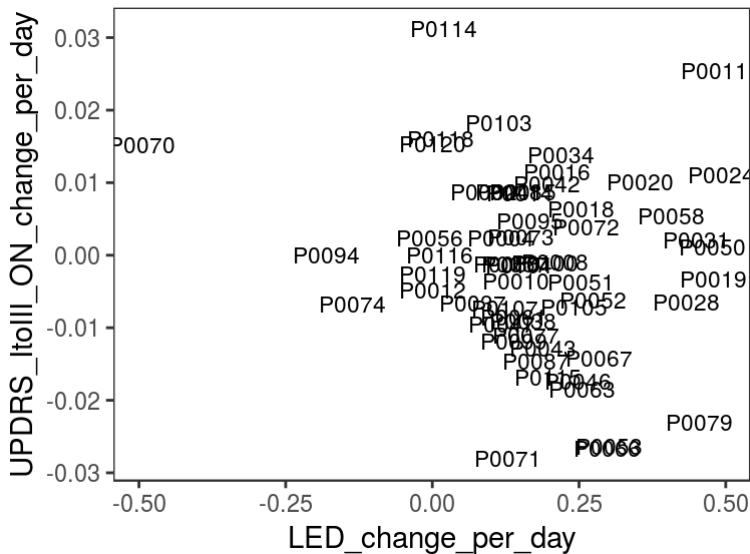

One subject (P0070) has a very large change in LED score; this was due to a side-effect related adjustment in medication. Exclude this subject from further progression comparisons:

```
prog_change <- subset(prog_change, Subject != "P0070")
```

Z-transform the “change per day” variables, subset to follow-up only, and create a combined sum variable:

```
prog_change$LED_change_z <- scale(prog_change$LED_change_per_day)[, 1]
prog_change$UPDRS_ItoIII_ON_change_z <- scale(prog_change$UPDRS_ItoIII_ON_change_per_day)[, 1]
```

```
prog_change_fu <- subset(prog_change, Timepoint == "followup")
prog_change_fu$UPDRS_LED_change_sum <- rowSums(prog_change_fu[, c("LED_change_z",
  "UPDRS_ItoIII_ON_change_z")])
```

```
summary(prog_change_fu$UPDRS_LED_change_sum)
```

```
##      Min. 1st Qu.  Median    Mean 3rd Qu.    Max.
## -2.59786 -0.97567 -0.04293  0.00000  0.91515  4.11067
```

*# Plot that shows the median and 1st and 3rd quartiles:*

```
ggplot(prog_change_fu, aes(UPDRS_LED_change_sum)) +
  geom_histogram(color = "black", binwidth = 0.2, fill = "gray60") +
  theme_bw(base_size = 10) +
  scale_x_continuous(breaks = c(seq(-3.2, 4.5, 0.4)), limits = c(-3.2, 4.4)) +
  geom_vline(xintercept = quantile(prog_change_fu$UPDRS_LED_change_sum, probs = 0.25), lty = 2,
  color = "gray10", size = 1) +
  geom_vline(xintercept = median(prog_change_fu$UPDRS_LED_change_sum), color = "gray10", size = 1) +
  geom_vline(xintercept = quantile(prog_change_fu$UPDRS_LED_change_sum, probs = 0.75),
  lty = 2, color = "gray10", size = 1) +
  xlab("Sum of z-transformed change in UPDRS I to III and LED") +
  scale_y_continuous(breaks = seq(0, 10, 2)) +
  ylab("Number of samples") +
  theme(panel.grid.major.x = element_blank(), panel.grid.minor.x = element_blank(),
  panel.grid.major.y = element_line(color = "gray70"), panel.grid.minor.y = element_blank())
```



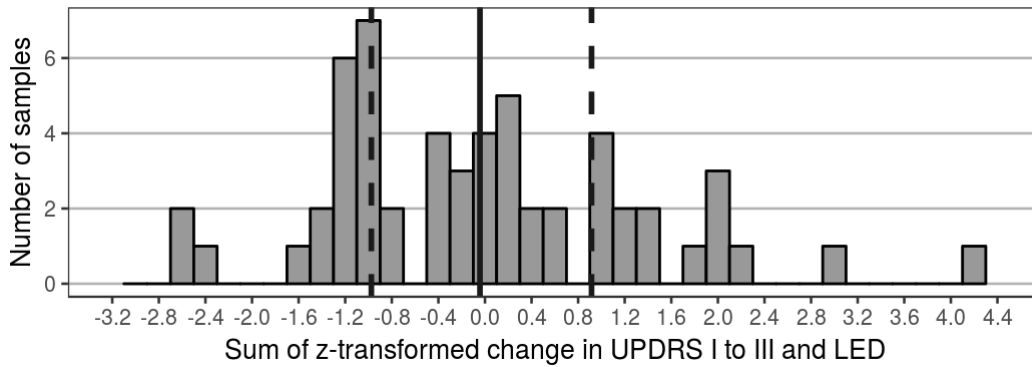

To contrast the subjects with the largest change in UPDRS and LED sum, we decided to use the 3rd quartile as a cutoff, and created a progression variable based on this. A histogram colored by the progression variable:

Figure 2

```
# Progression variable:
prog_change_fu$ProgCat <- cut(prog_change_fu$UPDRS_LED_change_sum,
                             breaks = c(min(prog_change_fu$UPDRS_LED_change_sum) - 0.1, 0.8,
                                         max(prog_change_fu$UPDRS_LED_change_sum)))
levels(prog_change_fu$ProgCat) <- c("stable", "progressed")

# Redraw the plot using this new variable:
fig2 <- ggplot(prog_change_fu, aes(UPDRS_LED_change_sum, fill = ProgCat)) +
  geom_histogram(color = "black", binwidth = 0.2) +
  theme_bw(base_size = 10) +
  scale_x_continuous(breaks = c(seq(-3.2, 4.5, 0.8)), limits = c(-3.2, 4.4)) +
  scale_fill_manual(values = c("gray85", "gray30"), name = "Progression") +
  geom_vline(xintercept = median(prog_change_fu$UPDRS_LED_change_sum), color = "gray10", size =
    0.5) +
  geom_vline(xintercept = quantile(prog_change_fu$UPDRS_LED_change_sum, probs = 0.75),
    lty = 2, color = "gray10", size = 0.5) +
  xlab("Sum of z-transformed change per day in\nUPDRS I to III and LED") +
  scale_y_continuous(breaks = seq(0, 10, 2)) +
  ylab("Number of samples") +
  theme(panel.grid.major.x = element_blank(),
        panel.grid.major.y = element_line(color = "gray70"),
        panel.grid.minor = element_blank(),
        axis.text = element_text(color = "black"),
        legend.key.height = unit(5, "mm"),
        legend.key.width = unit(5, "mm"))
```

fig2

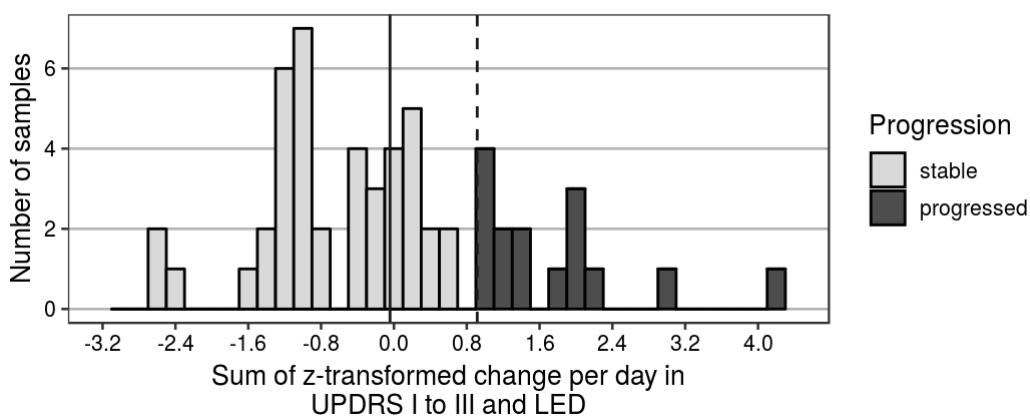

```
## Export to pdf
ggsave(fig2, filename = "Outputs/figure2.pdf", device = cairo_pdf,
       width = fullpage, height = 3, units = "in")
```



Add this progression variable to the data with both time points (the same value at baseline and follow-up, so at baseline, this variable classifies subjects depending on whether they will or won't progress between timepoints):

```
prog_change$ProgCat <- rep(prog_change_fu$ProgCat, 2)
prog_change$ProgNum <- rep(prog_change_fu$UPDRS_LED_change_sum, 2)
```

## Comparisons between the disease progression categories

### Difference between timepoints

Test whether there is a difference between timepoints for each variable when only looking at the stable or the progressed patients (“Does this variable differ between baseline and follow-up in stable patients? What about progressed patients?”). Again, run with a (rather cumbersome) custom summary function.

Select variables for comparisons (those that don't have too many NA values and are not “change between timepoints” variables or the progression variable that are being contrasted).

```
# select variables for comparisons
tpCompVars <- colnames(prog_change)[-c(1, grep("Timepoint", colnames(prog_change)),
      grep("change", colnames(prog_change)), grep("Prog", colnames(prog_change)))]
tpCompVars <- tpCompVars[which(colSums(is.na(prog_change[,tpCompVars])) < 50)]
tpCompVars <- tpCompVars[-grep("Subject", tpCompVars)]

# Add a sum variable of all levodopa medications:
prog_change$levodopa_mg <- rowSums(prog_change[, grep("levodopa.*mg", colnames(prog_change))])
tpCompVars <- c(tpCompVars, "levodopa_mg")

# Run the comparisons separately for each group:

# Stable
metapd_timepoints_summary_noprogram <- metaSummaryGeneric(subset(prog_change, ProgCat == "stable"),
  tpCompVars, "Timepoint", pairing = TRUE)

# Progressed
metapd_timepoints_summary_prog <- metaSummaryGeneric(subset(prog_change, ProgCat == "progressed"),
  tpCompVars, "Timepoint", pairing = TRUE)
```

Perform some further rearrangement steps to get the table to the final form:

```
summaryConcat <- function(df, vargroup){
  percvar <- paste(vargroup, "%", sep = "_")
  meanvar <- paste(vargroup, "mean", sep = "_")
  sdvar <- paste(vargroup, "SD", sep = "_")
  q1var <- paste(vargroup, "Q1", sep = "_")
  q3var <- paste(vargroup, "Q3", sep = "_")
  medianvar <- paste(vargroup, "median", sep = "_")

  pmmvar <- round(df[,percvar],2)
  pmmvar[df$test == "t"]<-paste(
    round(df[df$test == "t",meanvar],2), " ± ",
    round(df[df$test == "t",sdvar],2),
    sep="")
  pmmvar[df$test == "wilcox"]<-paste(
    round(df[df$test == "wilcox",medianvar],2), " [",
    round(df[df$test == "wilcox",q1var],2), "-",
    round(df[df$test == "wilcox",q3var],2), "]", sep = "")

  return(pmmvar)
}

metapd_timepoints_summary_noprogram <-
  metapd_timepoints_summary_noprogram[!is.na(metapd_timepoints_summary_noprogram$test),]
metapd_timepoints_summary_noprogram$bl_perc_meanSD_medianIQR <-
  summaryConcat(metapd_timepoints_summary_noprogram, "baseline")
```

```

metapd_timepoints_summary_noprogram$fu_perc_meanSD_medianIQR <-
  summaryConcat(metapd_timepoints_summary_noprogram, "followup")
metapd_timepoints_summary_noprogram <- metapd_timepoints_summary_noprogram[, c(
  "bl_perc_meanSD_medianIQR", "fu_perc_meanSD_medianIQR", "pVal", "test")]
colnames(metapd_timepoints_summary_noprogram) <- paste("stable",
  colnames(metapd_timepoints_summary_noprogram), sep = "_")

metapd_timepoints_summary_program <-
  metapd_timepoints_summary_program[!is.na(metapd_timepoints_summary_program$test),]
metapd_timepoints_summary_program$bl_perc_meanSD_medianIQR <-
  summaryConcat(metapd_timepoints_summary_program, "baseline")
metapd_timepoints_summary_program$fu_perc_meanSD_medianIQR <-
  summaryConcat(metapd_timepoints_summary_program, "followup")
metapd_timepoints_summary_program <- metapd_timepoints_summary_program[,c(
  "bl_perc_meanSD_medianIQR", "fu_perc_meanSD_medianIQR", "pVal", "test")]
colnames(metapd_timepoints_summary_program) <- paste("progressed",
  colnames(metapd_timepoints_summary_program), sep = "_")

metapd_tp_prog_summary <- cbind(metapd_timepoints_summary_noprogram, metapd_timepoints_summary_program)
metapd_tp_prog_summary$Variable <- rownames(metapd_tp_prog_summary)

```

## Difference between progression categories

Test whether there is a difference between the stable and progressed patients at each timepoint (“Do the stable and progressed patients differ at baseline? What about follow-up?”), also with a customized summary function.

Run the comparisons and add these to the final output table from the between-timepoint comparisons in the previous subsection:

```

prog_conf_comp_bl <- metaSummaryGeneric(subset(prog_change, Timepoint == "baseline"),
  metapd_tp_prog_summary$Variable, "ProgCat")
colnames(prog_conf_comp_bl) <- paste("prog_baseline", colnames(prog_conf_comp_bl), sep = "_")

prog_conf_comp_fu <- metaSummaryGeneric(subset(prog_change, Timepoint == "followup"),
  metapd_tp_prog_summary$Variable, "ProgCat")
colnames(prog_conf_comp_fu) <- paste("prog_followup", colnames(prog_conf_comp_fu), sep = "_")

```

## Combine the two sets of comparisons

Table 4

Collect the combined results for differences in progressed and stable patients, between groups and between timepoints. This table was exported for the manuscript (only first 10 rows shown here).

```

# Combine results with the between-timepoint comparisons:
metapd_tp_prog_summary <- cbind(metapd_tp_prog_summary,
  prog_conf_comp_bl[, c("prog_baseline_pVal", "prog_baseline_test")],
  prog_conf_comp_fu[, c("prog_followup_pVal", "prog_followup_test")])

# Table of results
kable(metapd_tp_prog_summary[1:10, 1:4], col.names = c("stable baseline % / meanSD /medianIQR",
  "stable followup % / meanSD /medianIQR", "stable timepoint diff pVal", "stable timepoint diff
  test"))

```

|                         | stable baseline % /<br>meanSD /medianIQR | stable followup % /<br>meanSD /medianIQR | stable timepoint diff<br>pVal | stable timepoint diff<br>test |
|-------------------------|------------------------------------------|------------------------------------------|-------------------------------|-------------------------------|
| gender                  | 53.66                                    | 53.66                                    | 1.0000000                     | fisher                        |
| BMI                     | 26.25 [24.15–29.8]                       | 27.28 [24.27–30.21]                      | 0.2247968                     | wilcox                        |
| age_at_stool_collection | 65 [61–69]                               | 67 [63–71]                               | 0.0000000                     | wilcox                        |
| sniffinsticks           | 7 [6–9]                                  | 7 [5–10]                                 | 0.8867549                     | wilcox                        |
| age_pd_diagnosed        | 60 [58–64]                               | 60 [58–64]                               | NaN                           | wilcox                        |
| age_motor_              | 59 [56–63]                               | 59 [56–63]                               | NaN                           | wilcox                        |
| symptoms_onset          |                                          |                                          |                               |                               |

|                                 | stable baseline % /<br>meanSD /medianIQR | stable followup % /<br>meanSD /medianIQR | stable timepoint diff<br>pVal | stable timepoint diff<br>test |
|---------------------------------|------------------------------------------|------------------------------------------|-------------------------------|-------------------------------|
| age_NMS_onset                   | 58 [55-60.5]                             | 58 [55-60.5]                             | NaN                           | wilcox                        |
| PD_relative                     | 23.08                                    | 25.64                                    | 1.0000000                     | fisher                        |
| history_-<br>lactoseintolerance | 9.76                                     | 9.76                                     | 1.0000000                     | fisher                        |
| history_diverticulosis          | 2.44                                     | 2.44                                     | 1.0000000                     | fisher                        |

```
kable(metapd_tp_prog_summary[1:10, 5:8], col.names = c("progressed baseline % / meanSD /medianIQR",
"progressed followup % / meanSD /medianIQR", "progressed timepoint diff pVal", "progressed
timepoint diff test"))
```

|                                 | progressed baseline % /<br>meanSD /medianIQR | progressed followup % /<br>meanSD /medianIQR | progressed timepoint<br>diff pVal | progressed timepoint<br>diff test |
|---------------------------------|----------------------------------------------|----------------------------------------------|-----------------------------------|-----------------------------------|
| gender                          | 46.67                                        | 46.67                                        | 1.0000000                         | fisher                            |
| BMI                             | 26.53 [25.28-28.24]                          | 26.9 [23.89-29.89]                           | 0.8903809                         | wilcox                            |
| age_at_stool_collection         | 65 [62.5-66.5]                               | 67 [65-69]                                   | 0.0003229                         | wilcox                            |
| sniffinsticks                   | 7 [7-9.75]                                   | 7.5 [6-10]                                   | 0.8868323                         | wilcox                            |
| age_pd_diagnosed                | 60 [57-65]                                   | 60 [57-65]                                   | NaN                               | wilcox                            |
| age_motor_-<br>symptoms_onset   | 59 [56.5-63.5]                               | 59 [56.5-63.5]                               | NaN                               | wilcox                            |
| age_NMS_onset                   | 61.5 [58.12-64]                              | 61.5 [58.12-64]                              | NaN                               | wilcox                            |
| PD_relative                     | 13.33                                        | 13.33                                        | 1.0000000                         | fisher                            |
| history_-<br>lactoseintolerance | 13.33                                        | 13.33                                        | 1.0000000                         | fisher                            |
| history_diverticulosis          | NA                                           | NA                                           | NA                                | none                              |

```
kable(metapd_tp_prog_summary[1:10, 9:ncol(metapd_tp_prog_summary)], col.names = c("Variable", "prog
vs stable baseline pVal", "prog vs stable baseline test", "prog vs stable followup pVal", "prog
vs stable followup test"))
```

|                                 | Variable                        | prog vs stable<br>baseline pVal | prog vs stable<br>baseline test | prog vs stable<br>followup pVal | prog vs stable<br>followup test |
|---------------------------------|---------------------------------|---------------------------------|---------------------------------|---------------------------------|---------------------------------|
| gender                          | gender                          | 0.7654898                       | fisher                          | 0.7654898                       | fisher                          |
| BMI                             | BMI                             | 0.9230736                       | wilcox                          | 0.6080844                       | wilcox                          |
| age_at_stool_<br>collection     | age_at_stool_<br>collection     | 0.8023173                       | wilcox                          | 0.9040648                       | wilcox                          |
| sniffinsticks                   | sniffinsticks                   | 0.4335528                       | wilcox                          | 0.3749284                       | wilcox                          |
| age_pd_diagnosed                | age_pd_diagnosed                | 0.9629168                       | wilcox                          | 0.9629168                       | wilcox                          |
| age_motor_-<br>symptoms_onset   | age_motor_-<br>symptoms_onset   | 0.8456205                       | wilcox                          | 0.8456205                       | wilcox                          |
| age_NMS_onset                   | age_NMS_onset                   | 0.2334229                       | wilcox                          | 0.2334229                       | wilcox                          |
| PD_relative                     | PD_relative                     | 0.7075588                       | fisher                          | 0.4809485                       | fisher                          |
| history_-<br>lactoseintolerance | history_-<br>lactoseintolerance | 0.6537878                       | fisher                          | 0.6537878                       | fisher                          |
| history_<br>diverticulosis      | history_<br>diverticulosis      | 1.0000000                       | fisher                          | 1.0000000                       | fisher                          |

```
## Export
write.csv(metapd_tp_prog_summary, "Outputs/table_4.csv")
```

List of variables differing between groups for further use downstream:

```
prog_sigvars <- unique(c(subset(metapd_tp_prog_summary, prog_baseline_pVal < 0.1)$Variable,
subset(metapd_tp_prog_summary, prog_followup_pVal < 0.1)$Variable))
prog_sigvars
```

```
## [1] "meds_ASA" "meds_statin"
## [3] "ropinirole_mg" "meds_COMT_inhibitor"
## [5] "meds_dopamine_agonist" "pigd_score_jankovic_ON"
## [7] "UPDRS_III_total_ON" "levodopa_entacapone_mg"
## [9] "entacapone_mg" "pramipexole_mg"
## [11] "UPDRS_V_ON" "UPDRS_II_total"
## [13] "UPDRS_ItoIII_ON"
```

## Final clinical data table

Add the progression variable to the main clinical data table and make a list of samples used in the progression analyses. This will be the metadata used in the final analyses.

```
pdclin[rownames(prog_change), "ProgCat"] <- prog_change$ProgCat
pdclin[rownames(prog_change), "ProgNum"] <- prog_change$ProgNum

prog_samples <- rownames(pdclin)[!is.na(pdclin$ProgCat)]
```

## Dietary data analyses (FFQ data)

Food Frequency Questionnaire data was only collected at the follow-up timepoint, so the following analyses will all concern that time point. (The variable names for this data are in Finnish, and some variables are local brands; translations are provided as necessary.)

Import data:

```
pdffq <- read.table("Inputs/pdfu_ffq.txt")
```

## Data setup and energy correction

For nutrients:

```
# List nutrients that are already given as percent of energy
nutrVarsE <- grep("_E", colnames(pdffq), value = TRUE)

# Convert non-energy nutrients to units per 1000 kcal
nutrVarsNE <- colnames(pdffq)[31:63]
nutrVarsNEdf <- pdffq[, nutrVarsNE] / pdffq$Energ_kc * 1000
colnames(nutrVarsNEdf) <- paste(colnames(nutrVarsNEdf), "per1kkc", sep = "_")
nutrVarsNE <- colnames(nutrVarsNEdf)

# A new data frame with only the energy adjusted variables:
pdffqEA <- cbind(pdffq$Parkinson, pdffq[, nutrVarsE], nutrVarsNEdf)
colnames(pdffqEA)[1] <- "Parkinson"

nutrVars <- c(nutrVarsE, nutrVarsNE)
```

For specific food items:

```
foodVars <- colnames(pdffq)[64:234]

foodNorm <- pdffq[, foodVars] / pdffq$Energ_kc * 1000
colnames(foodNorm) <- paste(foodVars, "per1kkc", sep = "_")
foodVars <- colnames(foodNorm)
```

Combine the two into a new table of energy-adjusted variables:

```
pdffqEA <- cbind(pdffqEA, foodNorm)
```

Make a version of this table where the variables are categorical instead of continuous, splitting them into quintiles:

```
pdffqCat <- pdffqEA

for(i in 2:ncol(pdffqCat)){
  pdffqCat[, i] <- cut(pdffqCat[, i], breaks = unique(quantile(pdffqCat[, i], probs = c(0, 0.2,
    0.4, 0.6, 0.8, 1))), include.lowest = TRUE)
}

# some variables only result in only one category; drop these as uninformative:
singleCatVars <- which(lengths(sapply(pdffqCat, table)) == 1)
pdffqCat <- pdffqCat[, -singleCatVars]
```

## Diet variables and PD vs control

### Overall energy intake

Plot and test if there are differences in overall energy intake between the groups:

```
ffqPlotEkj <- ggplot(pdffq, aes(x = Parkinson, y = Energ_Kj)) +  
  geom_boxplot() +  
  theme_bw() +  
  stat_summary(fun.y = mean, geom = "point", shape = 4, size = 4) +  
  ylab("Energy intake (Kj)") + xlab(NULL) +  
  theme(panel.grid = element_blank()) +  
  labs(caption = paste("p (Wilcoxon) = ",  
                       round(wilcox.test(pdffq$Energ_Kj ~ pdffq$Parkinson)$p.value,  
                                     digits = 5)))  
  
ffqPlotEkc <- ggplot(pdffq, aes(x = Parkinson, y = Energ_kc)) +  
  geom_boxplot() +  
  theme_bw() +  
  stat_summary(fun.y = mean, geom = "point", shape = 4, size = 4) +  
  ylab("Energy intake (kcal)") + xlab(NULL) +  
  theme(panel.grid = element_blank()) +  
  labs(caption = paste("p (Wilcoxon) = ",  
                       round(wilcox.test(pdffq$Energ_kc ~ pdffq$Parkinson)$p.value,  
                                     digits = 5)))  
  
grid.arrange(ffqPlotEkj, ffqPlotEkc, nrow = 1)
```

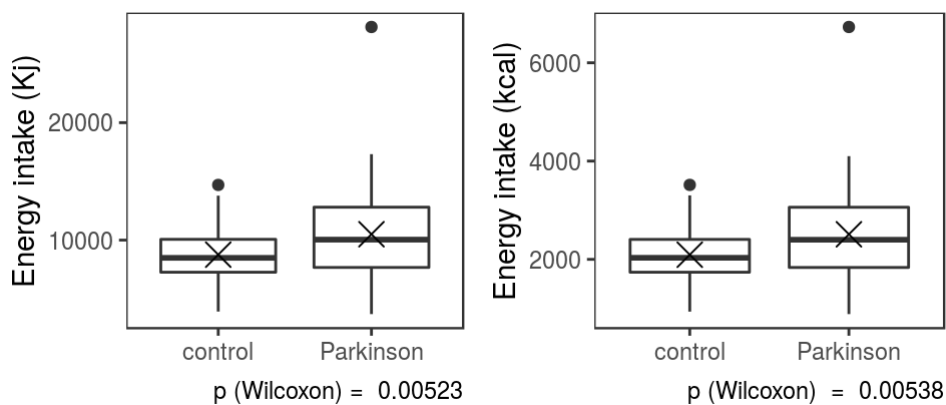

Energy intake is higher in PD patients than controls, and this difference is statistically significant.

### BMI

It was already shown in the earlier metadata comparisons above that there is no difference in BMI between the PD and control groups, but here's a plot to illustrate this.

```
ggplot(subset(pdclin, Timepoint == "followup"), aes(x = Parkinson, y = BMI)) +  
  geom_boxplot() +  
  theme_bw() +  
  stat_summary(fun.y = mean, geom = "point", shape = 4, size = 4) +  
  ylab("BMI") +  
  xlab(NULL) +  
  theme(panel.grid = element_blank())
```

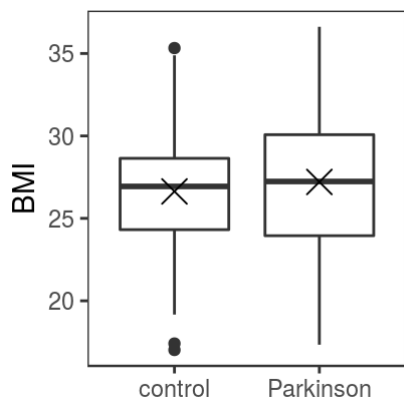

## Continuous diet variables

Compare the consumption of the energy-adjusted dietary items (as continuous variables) between PD and control.

```
# Make an empty data frame
numDiffs <- as.data.frame(matrix(ncol = 2, nrow = (ncol(pdffqEA)-1)))
colnames(numDiffs) <- c("Var", "WilcoxP")

# Test for differences
for(i in 2:ncol(pdffqEA)){
  numDiffs[i-1, 1] <- colnames(pdffqEA)[i]
  numDiffs[i-1, 2] <- wilcox.test(pdffqEA[, i] ~ pdffqEA$Parkinson)$p.value
}

# Adjust for multiple comparisons
numDiffs[, "pAdj"] <- p.adjust(numDiffs[, "WilcoxP"], method = "fdr")

# Table of variables closest to significant
kable_styling(kable(subset(numDiffs, pAdj < 0.1), digits = 4))
```

|    | Var              | WilcoxP | pAdj   |
|----|------------------|---------|--------|
| 30 | Magnes_per1kkc   | 7e-04   | 0.0718 |
| 36 | Niasiini_per1kkc | 6e-04   | 0.0718 |

None of the diet variables have a statistically significant multiple comparison corrected difference in consumption between the PD and control groups. Only two have  $p < 0.1$ . These are magnesium (“Magnes”) and niacin (“Niasiini”) intake.

## Categorical diet variables

Compare the consumption of the various dietary items in categorical form between PD and control.

```
# Make an empty data frame
catDiffs <- as.data.frame(matrix(ncol = 2, nrow = (ncol(pdffqCat)-1)))
colnames(catDiffs) <- c("Var", "FisherP")

# Test for differences
for(i in 2:ncol(pdffqCat)){
  catDiffs[i-1, 1] <- colnames(pdffqCat)[i]
  catDiffs[i-1, 2] <- fisher.test(x = pdffqCat[, i],
  y = pdffqCat$Parkinson)$p.value
}

# Adjust for multiple comparisons
catDiffs[, "pAdj"] <- p.adjust(catDiffs[, "FisherP"], method = "fdr")

# Table
kable_styling(kable(subset(catDiffs, pAdj < 0.1), digits = 4))
```

|     | Var              | FisherP | pAdj   |
|-----|------------------|---------|--------|
| 143 | Kaaliruo_perlkkc | 9e-04   | 0.0984 |
| 157 | Makaryht_perlkkc | 1e-03   | 0.0984 |

Similarly to the continuous variables, none of the categorical diet variables have a statistically significant multiple comparison corrected difference in consumption between the PD and control groups. Only two have  $p < 0.1$ , and these are cabbage-containing dishes (“Kaaliruo”) and pasta dishes (“Makaryht”). These do not sound like variables that are particularly interesting to explore further.

## Diet variables and PD progression

Test the progression categories separately to see if there are differences in their diets.

### Data setup

```
## Set up progression-specific diet data
progmeta <- subset(pdclin, rownames(pdclin) %in% prog_samples & Timepoint=="followup")

progffqCat <- subset(pdffqCat, rownames(pdffqCat) %in% progmeta$Subject)
progffqCat <- cbind(progffqCat, subset(pdffq, rownames(pdffqCat) %in% progmeta$Subject)[,
  c("Energ_Kj", "Energ_kc")])
progffqCat$Progression <- progmeta[progmeta$Subject %in% rownames(progffqCat), "ProgCat"]
progffqCat$ProgressionNum <- progmeta[progmeta$Subject %in% rownames(progffqCat),
  "UPDRS_LED_change_sum"]
progffqCat$Progression <- factor(progffqCat$Progression)
```

### Overall energy intake

```
wilcox.test(progffqCat$Energ_kc ~ progffqCat$Progression)

##
## Wilcoxon rank sum test with continuity correction
##
## data: progffqCat$Energ_kc by progffqCat$Progression
## W = 271, p-value = 0.5054
## alternative hypothesis: true location shift is not equal to 0

wilcox.test(progffqCat$Energ_Kj ~ progffqCat$Progression)

##
## Wilcoxon rank sum test
##
## data: progffqCat$Energ_Kj by progffqCat$Progression
## W = 271, p-value = 0.5094
## alternative hypothesis: true location shift is not equal to 0
```

There’s no difference in energy consumption between the two disease progression groups.

### Continuous diet variables

Compare the consumption of the various continuous, energy-adjusted dietary items between progressed and stable PD patients.

```
# Subset the continuous table for progression
progffqEA <- subset(pdffqEA, rownames(pdffqEA) %in% rownames(progffqCat))
progffqEA$Progression <- progffqCat$Progression

# Make an empty data frame
numDiffsProg <- as.data.frame(matrix(ncol = 2, nrow = (ncol(progffqEA)-2)))
colnames(numDiffsProg) <- c("Var", "WilcoxP")
```



```

# Compare
for(i in 2:(ncol(progffqEA)-1)){
  numDiffsProg[i-1, 1] <- colnames(progffqEA)[i]
  numDiffsProg[i-1, 2] <- wilcox.test(progffqEA[,i]~progffqEA$Progression)$p.value
}

# Adjust for multiple comparisons and check results
numDiffsProg[, "pAdj"]<-p.adjust(numDiffsProg[, "WilcoxP"], method = "fdr")
subset(numDiffsProg, pAdj < 0.1)

## [1] Var      WilcoxP pAdj
## <0 rows> (or 0-length row.names)

```

There are no variables that have a multiple comparison corrected  $p$ -value  $< 0.1$ , let alone below the 0.05 cutoff.

## Categorical diet variables

Compare the consumption of the various dietary items in categorical form between the two progression groups.

```

# Make an empty data frame
catDiffsProg <- as.data.frame(matrix(ncol = 2, nrow = (ncol(progffqCat)-5)))
colnames(catDiffsProg) <- c("Var", "FisherP")

# Compare
for(i in 2:197){
  catDiffsProg[i-1, 1] <- colnames(progffqCat)[i]
  catDiffsProg[i-1, 2] <- fisher.test(x = progffqCat[, i],
  y = progffqCat$Progression)$p.value
}

# Adjust for multiple comparisons and check results
catDiffsProg[, "pAdj"] <- p.adjust(catDiffsProg[, "FisherP"], method = "fdr")
subset(catDiffsProg, pAdj < 0.1)

## [1] Var      FisherP pAdj
## <0 rows> (or 0-length row.names)

```

Similarly to the continuous variable comparisons, there are no categorical diet variables that differ significantly between the stable and progressed PD patients.

## Dietary patterns with Principal Component Analysis

Perform a PCA to look for overall dietary pattern differences between subjects, using a hand-picked set of non-overlapping food item variables.

```

# Import list variables:
ffqpcaVars <- scan("Inputs/ffq_var_select.txt", what = "character")
ffqpcaVars <- paste(ffqpcaVars, "per1kkc", sep="_")

# Drop variables that ended up with only one level in the categorization
ffqpcaVars <- ffqpcaVars[-which(ffqpcaVars %in% names(singleCatVars))]

## Calculate the PCA with these variables & rename the columns in English:
pcadata <- scale(pdffqEA[, ffqpcaVars])
pcadata <- pcadata[1:nrow(pcadata),]
colnames(pcadata) <- scan("Inputs/ffq_englvars.txt", what="character")
ffqPCAf <- prcomp(pcadata)

# Plot the result
library("factoextra")

fviz_screplot(ffqPCAf, ncp = 15) +
  theme_bw() +
  geom_hline(yintercept = 5, linetype = 2, color = "red")

```



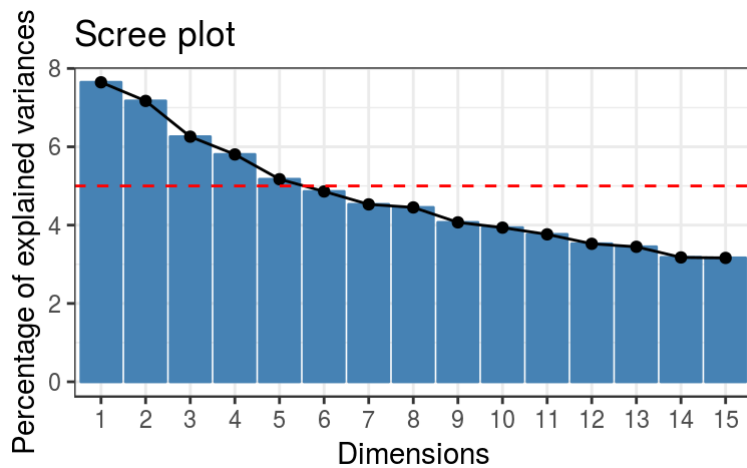

**Table S1**

The component loadings of the first five Principal Components (PCs) were exported as a supplementary table (only first 10 rows shown here).

```
kable(ffqPCAf$rotation[1:10, 1:5], digits = 3)
```

|                 | PC1    | PC2   | PC3    | PC4    | PC5    |
|-----------------|--------|-------|--------|--------|--------|
| Milk_IceCream   | -0.119 | 0.189 | -0.113 | 0.112  | -0.136 |
| Cheese          | 0.095  | 0.130 | 0.252  | -0.325 | 0.186  |
| ProcessedCheese | -0.067 | 0.120 | -0.356 | -0.021 | 0.193  |
| CottageCheese   | -0.204 | 0.212 | -0.261 | -0.163 | 0.228  |
| Quark           | -0.150 | 0.022 | -0.203 | -0.260 | 0.229  |
| Bread           | 0.240  | 0.156 | 0.226  | 0.112  | 0.086  |
| Porridge        | -0.186 | 0.194 | -0.118 | 0.052  | -0.193 |
| Cereal          | -0.182 | 0.125 | -0.059 | -0.175 | -0.260 |
| Muesli          | -0.240 | 0.126 | 0.094  | 0.068  | -0.391 |
| Confectionery   | 0.236  | 0.207 | -0.117 | 0.068  | -0.249 |

```
# Export
write.csv(ffqPCAf$rotation[,1:5], "Outputs/table_s1.csv")
```

Overall, there don't seem to be very strong patterns in the diet data, since even the best principal component explains less than 8% of the variation. Plot the top 10 contributing variables for the first three PCs:

```
fviz_contrib(ffqPCAf, choice = "var", axes = 1, top = 10) + ggtitle("PC1")
```

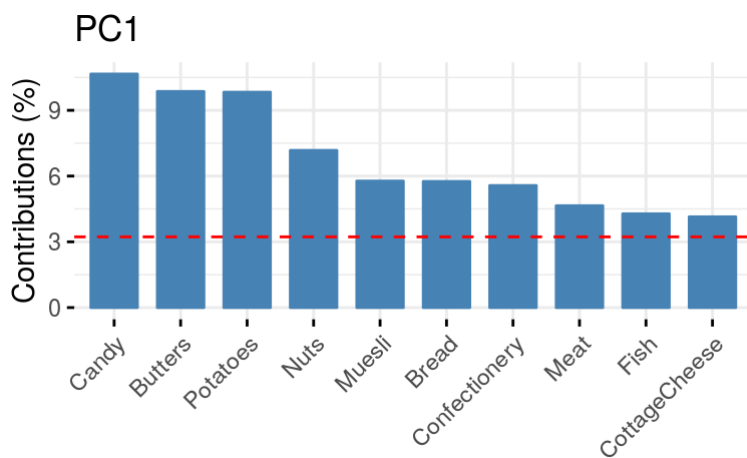

```
fviz_contrib(ffqPCAf, choice = "var", axes = 2, top = 10) + ggtitle("PC2")
```

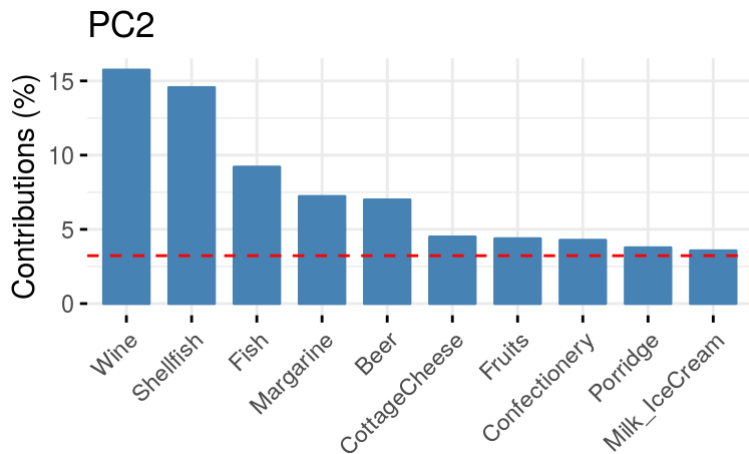

```
fviz_contrib(ffqPCAf, choice = "var", axes = 3, top = 10) + ggtitle("PC3")
```

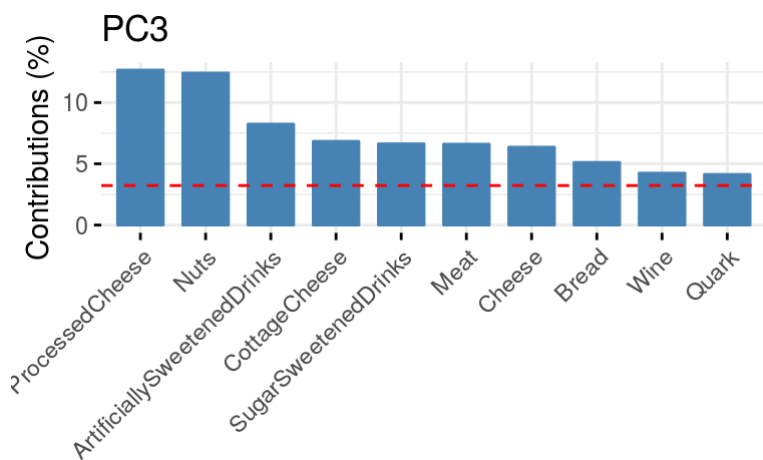

Save the first five PCs for further use:

```
pdffqCat$FoodPC1<-ffqPCAf$x[, "PC1"]
pdffqCat$FoodPC2<-ffqPCAf$x[, "PC2"]
pdffqCat$FoodPC3<-ffqPCAf$x[, "PC3"]
pdffqCat$FoodPC4<-ffqPCAf$x[, "PC4"]
pdffqCat$FoodPC5<-ffqPCAf$x[, "PC5"]
```

Further visualizations of the results:

```
library("ggfortify")

pcaPlotPD <- function(pcdat, df, x, y){
  autoplot(pcdat, data = df, x = x, y = y, colour = "Parkinson", shape = "Parkinson", loadings =
    TRUE, loadings.colour = "gray50", loadings.label = TRUE, loadings.label.size = 3.5, scale = 0)
  +
  theme_bw() +
  stat_ellipse(aes(group = Parkinson, color = Parkinson, lty = Parkinson), level = 0.9) +
  scale_color_manual(values = c("gray60", "gray30"), name = "Group") +
  scale_shape_manual(values = c(2, 19), name = "Group") +
  scale_linetype_manual(values = c(2, 1), name = "Group") +
  theme(panel.grid = element_blank())
}

pcaPlotPD(ffqPCAf, pdffqEA, 1, 2)
```

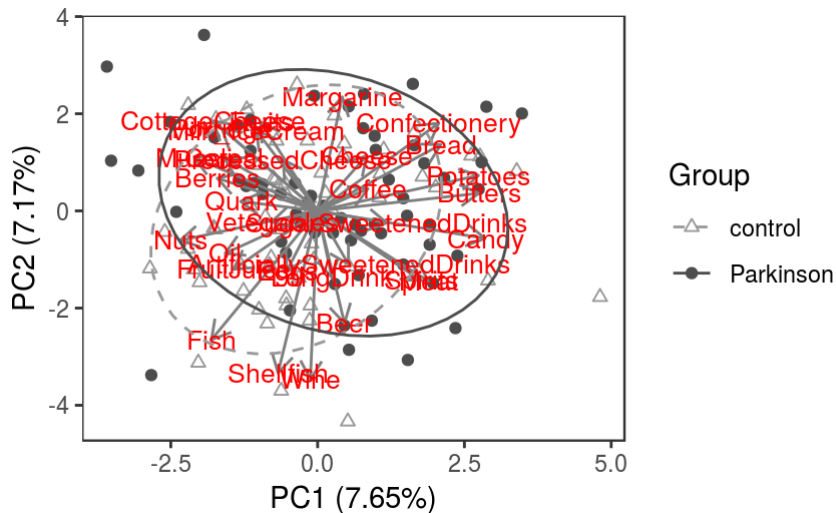

```
pcaPlotPD(ffqPCAf, pdfqEA, 1, 3)
```

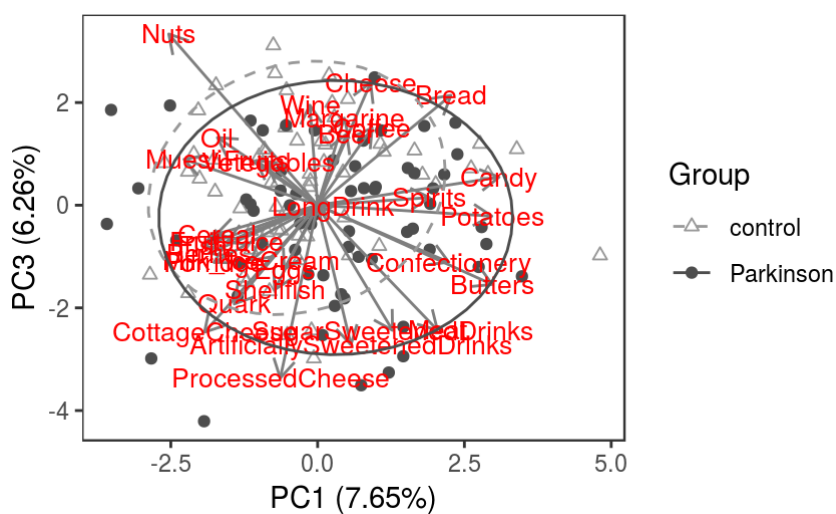

```
pcaPlotPD(ffqPCAf, pdfqEA, 2, 3)
```

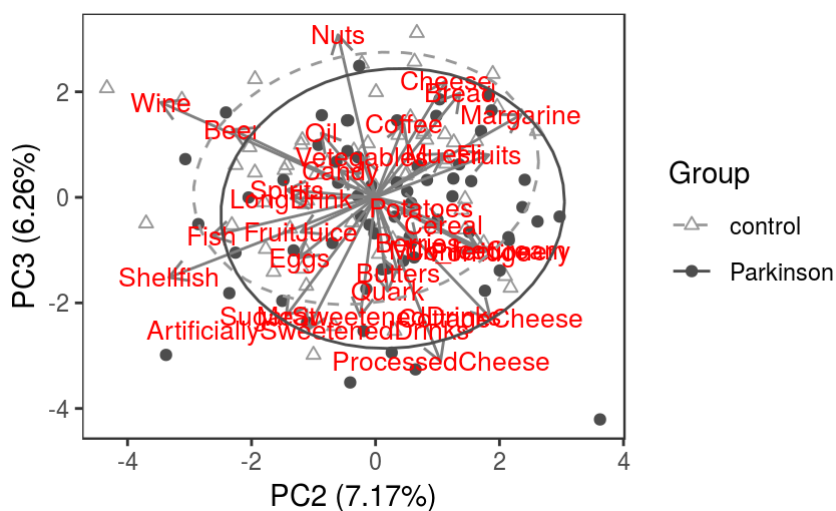

Out of this biplot, the one with the 1st and 3rd PCs looks like it separates the samples best:

**Figure 3**

```
fig3 <- arrangeGrob(
  autoplot(ffqPCAf, data = pdfqEA, x = 1, y = 3,
    colour = "Parkinson", shape = "Parkinson",
```

```

loadings = TRUE, loadings.colour = "gray50",
loadings.label = TRUE, loadings.label.size = 2.75,
scale = 0, loadings.label.repel = TRUE) +
ggtitle("A.") +
theme_bw(base_size = 9) +
coord_fixed() +
scale_color_manual(values = c("gray60", "gray30"), name = "Group") +
scale_shape_manual(values = c(2, 19), name = "Group") +
theme(panel.grid = element_blank(),
legend.position = "none"),
autoplot(ffqPCAF, data = pdffqEA, x = 1, y = 3,
colour = "Parkinson", shape = "Parkinson",
loadings = FALSE, loadings.colour = "gray50",
loadings.label = FALSE, loadings.label.size = 2.75, scale = 0) +
ggtitle("B.") +
theme_bw(base_size = 9) +
coord_fixed() +
stat_ellipse(aes(group = Parkinson, color = Parkinson, lty = Parkinson), level = 0.9) +
scale_color_manual(values = c("gray60", "gray30"), name = "Group") +
scale_shape_manual(values = c(2, 19), name = "Group") +
scale_linetype_manual(values = c(2, 1), name = "Group") +
theme(panel.grid = element_blank(),
legend.position = "bottom"),
ncol = 1, heights=c(0.88, 1))

```

grid.arrange(fig3)

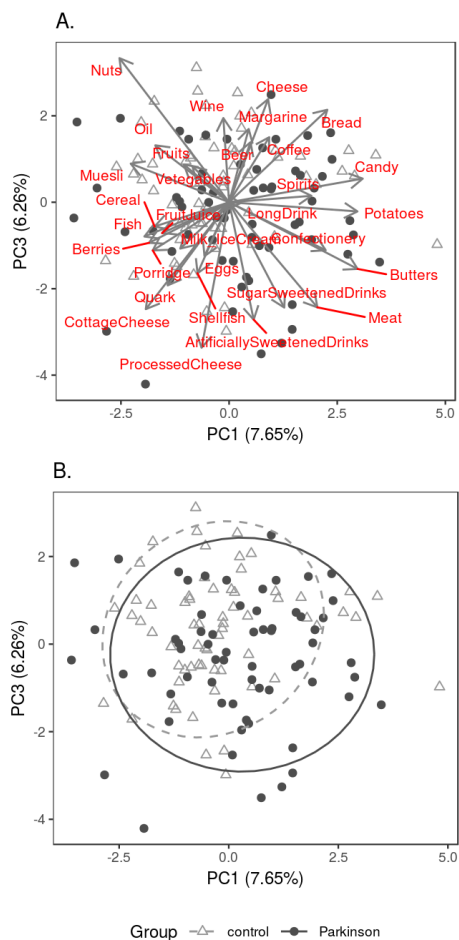

## Export to pdf

```

ggsave(fig3, filename = "Outputs/figure3.pdf", device = cairo_pdf,
width = halpage, height = 6.5, units = "in")

```

Based on these, PC1 will be kept for further downstream comparisons.

# Microbiota data: setup and basics

## Metadata and collinearity / confounders

Test what variables are correlated with Parkinson's status to decide which to include as potential confounders in PD vs control comparisons, and which are better left for the PD-only comparisons.

```
## Screen potential confounders for comparisons -----

## Add diet PC1 from the dietary analysis to the metadata table
# (using values from follow-up based diet results for both time points;
# assuming that the subjects' diet hasn't overall changed too much over two years)

# Make sure subjects match
identical(rep(rownames(pdffqCat), 2), as.character(pdclin$Subject))

## [1] TRUE

# Add to data frame
pdclin$FoodPC1 <- rep(pdffqCat$FoodPC1, 2)

# Add diet PC to the list of variables differing between PD and C for testing
adVars <- c(diffVarsCvsPD, "FoodPC1")

# Calculate Pearson correlations for these variables
# (all are either numerical or 0/1)
adVarsCor <- cor(as.data.frame(lapply(pdclin[, c("Parkinson", adVars)], as.numeric)), use =
  "pairwise.complete.obs")

# For PD-only comparisons:
adVarsPD <- c(names(which(abs(adVarsCor[, "Parkinson"]) > 0.45)), "meds_COMT_inhibitor")
# COMT inhibitors added to this list, since only PD patients use them.
adVarsPD <- adVarsPD[-grep("Parkinson", adVarsPD)] # drop the Parkinson variable

# For PD vs C comparisons
adVarsPDvsC <- names(which(abs(adVarsCor[, "Parkinson"]) <= 0.45))
adVarsPDvsC <- adVarsPDvsC[-grep("meds_COMT_inhibitor", adVarsPDvsC)] # leave COMT out

# Add the usage choices to the table
adVarsCorSummary <- data.frame(Variable = rownames(adVarsCor), PDCor = adVarsCor[, "Parkinson"])
adVarsCorSummary$UseForPDvsCAdonis <- as.numeric(adVarsCorSummary$Variable %in% adVarsPDvsC)
adVarsCorSummary$UseForProgAdonis <- as.numeric(adVarsCorSummary$Variable %in% adVarsPD)
adVarsCorSummary <- adVarsCorSummary[-grep("Parkinson", adVarsCorSummary$Variable),]
adVarsCorSummary <- adVarsCorSummary[order(adVarsCorSummary$UseForProgAdonis,
  adVarsCorSummary$PDCor),]
rownames(adVarsCorSummary) <- NULL
```

Table 2

Export the list of clinical confounders.

```
kable(adVarsCorSummary, digits = 3)
```

| Variable                        | PDCor  | UseForPDvsCAdonis | UseForProgAdonis |
|---------------------------------|--------|-------------------|------------------|
| history_TIA_ischemic_stroke     | -0.364 | 1                 | 0                |
| meds_statin                     | -0.332 | 1                 | 0                |
| meds_Warfarin                   | -0.205 | 1                 | 0                |
| meds_ca_antagonist              | -0.165 | 1                 | 0                |
| meds_ACEI_ARB                   | -0.160 | 1                 | 0                |
| MMSE_total                      | -0.159 | 1                 | 0                |
| gender                          | 0.016  | 1                 | 0                |
| age_at_stool_collection         | 0.061  | 1                 | 0                |
| BMI                             | 0.094  | 1                 | 0                |
| FoodPC1                         | 0.145  | 1                 | 0                |
| meds_anticholinergic            | 0.161  | 1                 | 0                |
| Rome_III_IBS_criteria_fulfilled | 0.280  | 1                 | 0                |

| Variable                             | PDCor  | UseForPDvsCAdonis | UseForProgAdonis |
|--------------------------------------|--------|-------------------|------------------|
| Wexner_total                         | 0.418  | 1                 | 0                |
| RLS                                  | 0.419  | 1                 | 0                |
| Rome_III_constip_defec_sumscore_9.15 | 0.432  | 1                 | 0                |
| sniffinsticks                        | -0.769 | 0                 | 1                |
| meds_COMT_inhibitor                  | 0.307  | 0                 | 1                |
| GDS_15                               | 0.491  | 0                 | 1                |
| SCS_PD_total                         | 0.520  | 0                 | 1                |
| SDQ_total                            | 0.529  | 0                 | 1                |
| RBDSQ                                | 0.580  | 0                 | 1                |
| NMSS_total                           | 0.607  | 0                 | 1                |
| meds_dopa                            | 0.662  | 0                 | 1                |
| NMSQuest_total                       | 0.714  | 0                 | 1                |
| meds_MAO_inhibitor                   | 0.736  | 0                 | 1                |
| LED                                  | 0.753  | 0                 | 1                |
| meds_dopamine_agonist                | 0.807  | 0                 | 1                |

```
# Export
write.csv(adVarsCorSummary, "Outputs/table_2.csv")
```

## Data setup

### Full data

Set up the final microbiota data objects for the rest of the analyses:

```
## Adding a sequencing run variable
run_batch <- read.csv("Inputs/run_variable.csv")

# Verify that the names match the clinical data table; add to clinical data
if(identical(as.character(run_batch$Sample), rownames(pdclin))){
  pdclin$Run <- run_batch$Run
} else {
  print("Names don't match!")
}

## Match the 16S table to the clinical metadata
pd16s <- pd16s[,rownames(pdclin)]

## Create the final phyloseq object
newPD <- phyloseq(otu_table(pd16s, taxa_are_rows = TRUE), tax_table(pdtax), sample_data(pdclin))

# Delete OTUs with 0 reads in the remaining samples
newPD <- subset_taxa(newPD, taxa_sums(newPD) > 0)

# Add a combined timepoint + PD variable:
sample_data(newPD)$PD_TP <- factor(paste(sample_data(newPD)$Parkinson, sample_data(newPD)$Timepoint,
  sep = "_"), levels = c("control_baseline", "Parkinson_baseline", "control_followup",
  "Parkinson_followup"))

## Make genus and family level objects
newPDgen <- collapseTaxLevel(newPD, level = "Genus", fixUnclassifieds = FALSE)
newPDfam <- collapseTaxLevel(newPD, level = "Family", fixUnclassifieds = FALSE)
```

## Progression

A separate phyloseq object for PD-only progression comparisons:

```
progmeta <- subset(pdclin, rownames(pdclin) %in% prog_samples)

progPhy <- phyloseq(otu_table(pd16s[, colnames(pd16s) %in% rownames(progmeta)], taxa_are_rows =
  TRUE), tax_table(pdtax), sample_data(progmeta))

# combined timepoint + progression variable:
```

```

sample_data(progPhy)$ProgTP <- factor(paste(sample_data(progPhy)$ProgCat,
  sample_data(progPhy)$Timepoint, sep = "_"),
  levels = c("stable_baseline", "progressed_baseline", "stable_followup", "progressed_followup"))

## Make genus and family level objects
progPhyGen <- collapseTaxLevel(progPhy, level = "Genus", fixUnclassifieds = FALSE)
progPhyFam <- collapseTaxLevel(progPhy, level = "Family", fixUnclassifieds = FALSE)

```

## PD Phenotype

A separate phyloseq object for PD-only comparisons of PD phenotypes (TD vs PIGD); dropping patients with a mixed (MX) phenotype:

```

# Rename the target variable to something less wordy:
colnames(sample_data(progPhy))[which(colnames(sample_data(progPhy)) ==
  "td_pigd_subtype_cutoff_1.5_1.0_jankovic_ON")] <- "JankovicClass"

# Drop MX subjects:
progPhyPhe <- subset_samples(progPhy, JankovicClass != "MX")
progPhyPheGen <- collapseTaxLevel(progPhyPhe, level = "Genus", fixUnclassifieds = FALSE)
progPhyPheFam <- collapseTaxLevel(progPhyPhe, level = "Family", fixUnclassifieds = FALSE)

# Check how many samples are left:
kable_styling(kable(table(sample_data(progPhyPhe)$JankovicClass,
  sample_data(progPhyPhe)$Timepoint)), full_width = FALSE)

```

|      | baseline | followup |
|------|----------|----------|
| PIGD | 28       | 35       |
| TD   | 21       | 20       |

## Diet

A phyloseq object with metadata that includes all nutrients, probiotic use, the list of non-overlapping food items used for the PCA, and the first five PCs from the diet PCA, for running comparisons of diet vs microbiota:

```

# List of variables:
ffqVars <- c(colnames(pdffqCat[2:47]), ffqpcaVars, "Probio_per1kkc", "FoodPC1", paste("FoodPC", 2:5,
  sep = ""))

# Put together metadata
ffqmeta <- pdffqCat[, ffqVars]
rownames(ffqmeta) <- paste(rownames(ffqmeta), "N", sep = "")
ffqmeta <- cbind(pdclin[rownames(ffqmeta),], ffqmeta[, -grep("FoodPC1", colnames(ffqmeta))])
# (PC1 was already added to the clinical metadata earlier; left out to avoid duplicating it)

# Create phyloseq object
ffqPhy <- phyloseq(otu_table(pd16s[, colnames(pd16s) %in% rownames(ffqmeta)], taxa_are_rows = TRUE),
  tax_table(pdtax), sample_data(ffqmeta))

```

## Basic statistics and plots of data

Number of sequence reads in final data set:

```

# Total number of reads:
sum(sample_sums(newPD))

```

```
## [1] 18867278
```

```

# Summary statistics
summary(sample_sums(newPD))

```

```
##   Min. 1st Qu.  Median    Mean 3rd Qu.    Max.
##   2201   50032   73078   73700   98685   262621
```

Numbers of taxa on different taxonomic levels:

```
print(paste("OTUs: ", ntaxa(newPD), ", genera: ", ntaxa(subset_taxa(newPDgen, Genus !=
  "unclassified")), ", families: ", ntaxa(subset_taxa(newPDFam, Family != "unclassified")),
  sep=""))
```

```
## [1] "OTUs: 2836, genera: 198, families: 77"
```

Bar charts of the most common bacterial families in the data:

Figure 4

```
# Set up data for PD vs control plot
bcdataF <- relAbundChart(collapseTaxLevel(newPD, level = "Family", maxUnclassifiedLevel = "Order"),
  byVariable = "PD_TP", taxaCount = 11, table = TRUE)
bcdataF$Taxon <- factor(gsub("_", " ", rownames(bcdataF)))
bcdataF <- melt(bcdataF)
bcdataF$Taxon <- factor(bcdataF$Taxon, levels = unique(bcdataF$Taxon))
bcdataF$PD <- factor(gsub("_.*", "", bcdataF$variable), levels = c("control", "Parkinson"))
bcdataF$TP <- factor(gsub(".*_", "", bcdataF$variable), levels = c("baseline", "followup"))
levels(bcdataF$TP) <- c("Baseline", "Follow-up")

bccolsF <- c(brewer.pal(name = "BrBG", n = 10)[c(1, 3, 4, 5, 8)], brewer.pal(name = "PRGn", n =
  10)[c(1, 3, 5, 8, 10)], "gray25", "gray75")
names(bccolsF) <- unique(bcdataF$Taxon)

# Set up data for progression plot
bcdataProgFam <- relAbundChart(collapseTaxLevel(progPhy, level = "Family", maxUnclassifiedLevel =
  "Order"), byVariable = "ProgTP", taxaCount = 11, table = TRUE)
bcdataProgFam$Taxon <- factor(gsub("_", " ", rownames(bcdataProgFam)))
bcdataProgFam <- melt(bcdataProgFam)
bcdataProgFam$Taxon <- factor(bcdataProgFam$Taxon, levels = unique(bcdataProgFam$Taxon))
bcdataProgFam$Prog <- factor(gsub("_.*", "", bcdataProgFam$variable), levels = c("stable",
  "progressed"))
levels(bcdataProgFam$Prog) <- c("stable", "progressed")
bcdataProgFam$TP <- factor(gsub(".*_", "", bcdataProgFam$variable), levels = c("baseline",
  "followup"))

progFamCols <- as.character(unique(bcdataProgFam$Taxon))
bccolsProgF <- bccolsF[match(progFamCols, names(bccolsF))]
# one there's one family that's not in the other color list, add:
names(bccolsProgF)[is.na(bccolsProgF)] <- progFamCols[!(progFamCols %in% names(bccolsF))]
bccolsProgF[is.na(bccolsProgF)] <- c("aquamarine")

## Plot the two together

# Facet labels with numbers of samples
labelsPDC <- c(control = paste("control (n = ",
  nrow(subset(pdclin, Parkinson == "control"))/2, ")"), sep = ""),
  Parkinson = paste("Parkinson (n = ",
  nrow(subset(pdclin, Parkinson == "Parkinson"))/2, ")"), sep = "")
labelsProg <- c(stable = paste("stable (n = ",
  nrow(subset(progmeta, ProgCat == "stable"))/2, ")"), sep = ""),
  progressed = paste("progressed (n = ",
  nrow(subset(progmeta, ProgCat == "progressed"))/2, ")"), sep = "")

# Shorten one unclassified label
names(bccolsF)[3] <- gsub("\\(unclassified.*", " (unclassified)", names(bccolsF)[3])
names(bccolsProgF)[3] <- gsub("\\(unclassified.*", " (unclassified)", names(bccolsProgF)[3])
```



```

# Italics for families in legends
taxlabelsPDC <- parse(text = c(paste('italic(`', names(bccolsF)[1:10], '`)', sep = ""),
                             paste('plain(`', names(bccolsF)[11:12], '`)', sep = "")))
taxlabelsProg <- parse(text = c(paste('italic(`', names(bccolsProgF)[1:10], '`)', sep = ""),
                                paste('plain(`', names(bccolsProgF)[11:12], '`)', sep = "")))

# Make the plot
fig4 <- arrangeGrob(
  ggplot(bcdDataF, aes(x = TP, y = value, fill = Taxon)) +
    geom_bar(stat = "identity", position = "stack") +
    xlab(NULL) +
    ylab("Mean relative abundance (%)") +
    scale_fill_manual(values = bccolsF, labels = taxlabelsPDC, name = "Family") +
    guides(fill = guide_legend(ncol = 1)) +
    ggtitle("A.") +
    theme_bw(base_size = 11) +
    facet_grid(~ PD, labeller = labeller(PD = labelsPDC)) +
    scale_x_discrete(labels = c("Baseline", "Follow-up")) +
    theme(axis.text.x = element_text(color = "black"),
          strip.background = element_rect(fill = "white"),
          panel.grid = element_blank(),
          legend.text.align = 0,
          legend.key.height = unit(4, "mm"),
          legend.key.width = unit(4, "mm"),
          legend.text = element_text(size = 9),
          legend.margin = ggplot2::margin(r = 7, unit = "mm")),
  ggplot(bcdDataProgFam, aes(x = TP, y = value, fill = Taxon)) +
    geom_bar(stat = "identity", position = "stack") +
    facet_grid(~ Prog, labeller = labeller(Prog = labelsProg)) +
    xlab(NULL) +
    ylab("Mean relative abundance (%)") +
    scale_fill_manual(values = bccolsProgF, labels = taxlabelsProg, name = "Family") +
    guides(fill = guide_legend(ncol = 1)) +
    ggtitle("B.") +
    theme_bw(base_size = 11) +
    scale_x_discrete(labels = c("Baseline", "Follow-up")) +
    theme(axis.text.x = element_text(color = "black"),
          strip.background = element_rect(fill = "white"),
          panel.grid = element_blank(),
          legend.text.align = 0,
          legend.key.height = unit(4, "mm"),
          legend.key.width = unit(4, "mm"),
          legend.text = element_text(size = 9),
          legend.margin = ggplot2::margin(r = 7, unit = "mm")),
  ncol = 1)

grid.arrange(fig4)

```

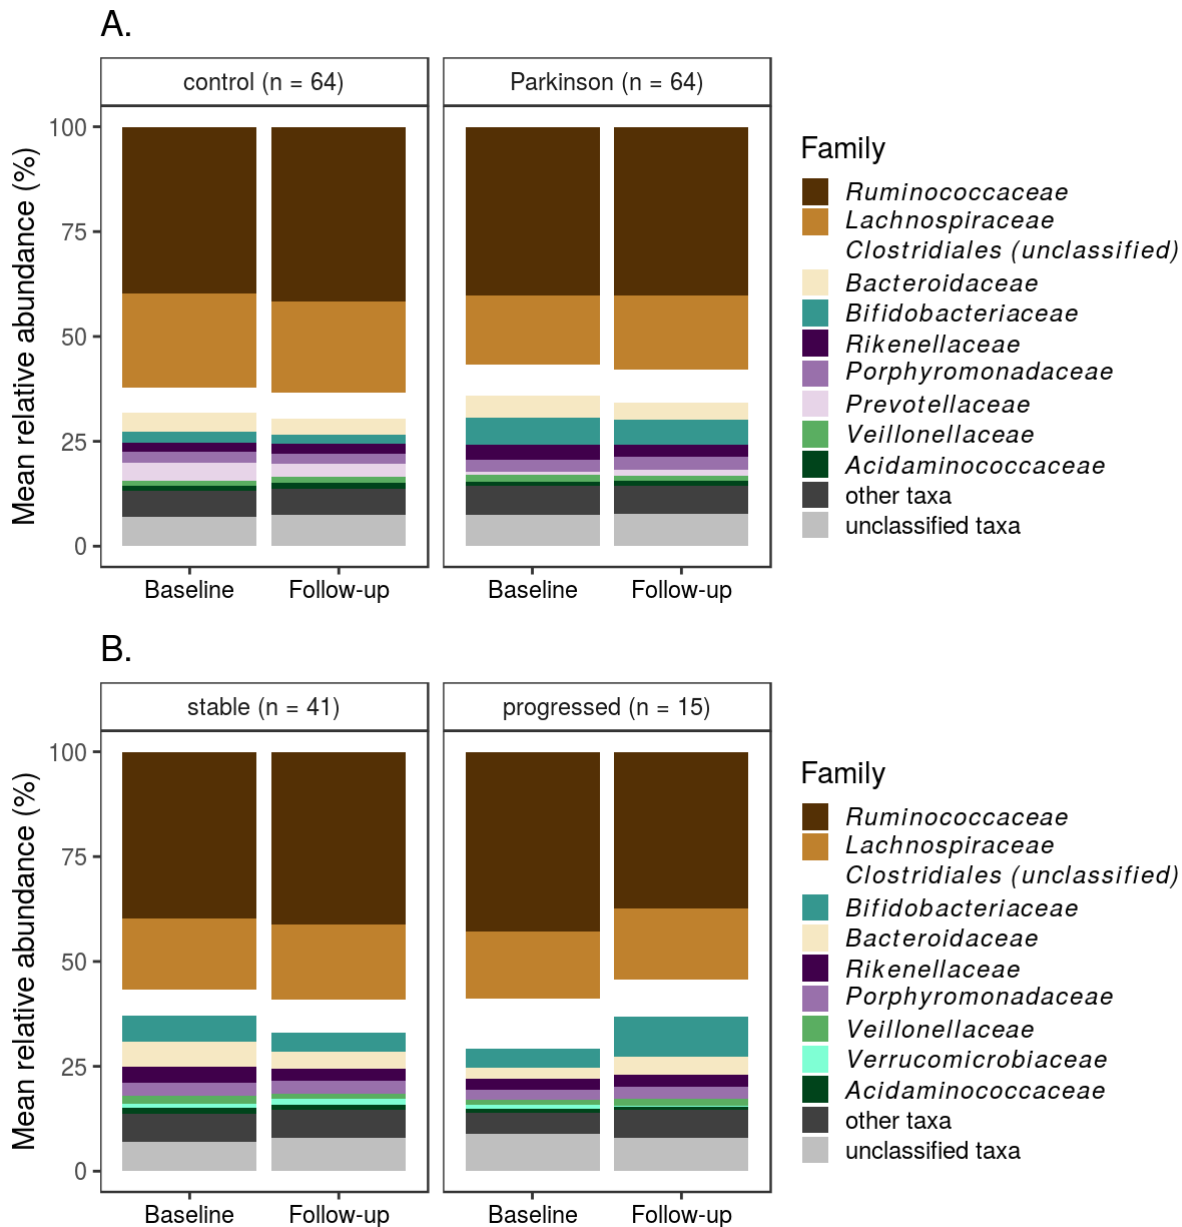

```
## Export to pdf
ggsave(fig4, filename = "Outputs/figure4.pdf", device = cairo_pdf,
width = fullpage, height = maxhi*0.75, units = "in")
```

Basic comparisons for commonly used ratios for specific bacterial phyla and genera:

```
# Make a new data frame for this
ptbdf <- as.data.frame(matrix(nrow = nrow(sample_data(newPDgen)), ncol = 0))

# Collapse microbiota data to phylum level
newPDphy <- collapseTaxLevel(newPD, level = "Phylum", fixUnclassifieds = FALSE)

# clinical data
rownames(ptbdf) <- rownames(sample_data(newPD))
ptbdf$Parkinson <- sample_data(newPD)$Parkinson
ptbdf$Timepoint <- sample_data(newPD)$Timepoint
ptbdf$Progression <- sample_data(newPD)$ProgCat

# Firmicutes/Bacteroides ratio
ptbdf$FtoB <- as.vector(otu_table(newPDphy)["Firmicutes"]) /
as.vector(otu_table(newPDphy)["Bacteroidetes"])

# Prevotella/Bacteroides ratio
```

```

ptbdf$PtoB <- as.vector(otu_table(newPDgen)["Prevotella"]) /
  as.vector(otu_table(newPDgen)["Bacteroides"])

# Separate subset for PD progression
ptbdfProg <- subset(ptbdf, rownames(ptbdf) %in% prog_samples)

## Test for statistically significant differences (timepoints separated)

# PD vs control
ptb_sigs <- data.frame(
  Baseline = c(
    wilcox.test(data = subset(ptbdf, Timepoint == "baseline"), FtoB ~ Parkinson)$p.value,
    wilcox.test(data = subset(ptbdf, Timepoint == "baseline"), PtoB ~ Parkinson)$p.value),
  Followup = c(
    wilcox.test(data = subset(ptbdf, Timepoint == "followup"), FtoB ~ Parkinson)$p.value,
    wilcox.test(data = subset(ptbdf, Timepoint == "followup"), PtoB ~ Parkinson)$p.value),
  row.names = c("Firmicutes_to_Bacteroidetes", "Prevotella_to_Bacteroides"))

kable_styling(kable(ptb_sigs, digits = 3), full_width = FALSE)

```

|                             | Baseline | Followup |
|-----------------------------|----------|----------|
| Firmicutes_to_Bacteroidetes | 0.832    | 0.670    |
| Prevotella_to_Bacteroides   | 0.052    | 0.011    |

```

# Plot the Prevotella/Bacteroidetes ratio
ggplot(ptbdf, aes(x = Parkinson, y = PtoB)) +
  geom_boxplot(width = 0.4, outlier.shape = NA) +
  geom_jitter(width = 0.3, alpha = 0.4, size = 1) +
  facet_grid(~Timepoint) +
  theme_bw() +
  ylab("Prevotella/Bacteroides ratio") +
  theme(panel.grid = element_blank())

```

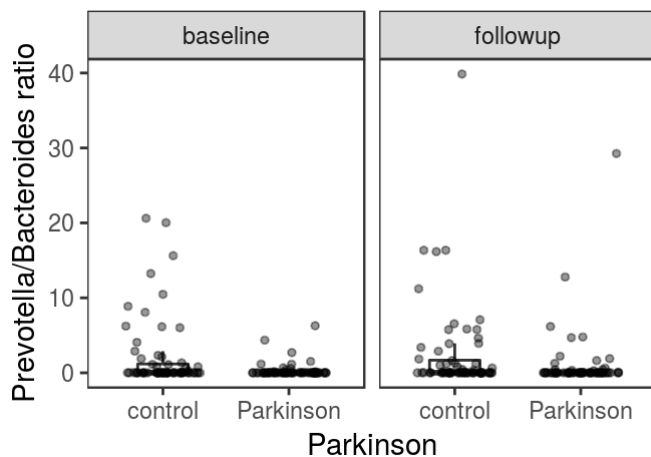

The *Firmicutes/Bacteroidetes* ratio does not differ between groups, but *Prevotella/Bacteroides* is significantly different at follow-up, and borderline ( $0.1 > p > 0.05$ ) at baseline.

What about the PD progression categories?

```

ptb_prog_sigs <- data.frame(
  Baseline = c(
    wilcox.test(data = subset(ptbdfProg, Timepoint == "baseline"), FtoB ~ Progression)$p.value,
    wilcox.test(data = subset(ptbdfProg, Timepoint == "baseline"), PtoB ~ Progression)$p.value),
  Followup = c(
    wilcox.test(data = subset(ptbdfProg, Timepoint == "followup"), FtoB ~ Progression)$p.value,
    wilcox.test(data = subset(ptbdfProg, Timepoint == "followup"), PtoB ~ Progression)$p.value),
  row.names = c("Firmicutes_to_Bacteroidetes", "Prevotella_to_Bacteroides"))

```

```
kable_styling(kable(ptb_prog_sigs, digits = 3), full_width = FALSE)
```

|                             | Baseline | Followup |
|-----------------------------|----------|----------|
| Firmicutes_to_Bacteroidetes | 0.012    | 0.840    |
| Prevotella_to_Bacteroides   | 0.511    | 0.107    |

The *Firmicutes/Bacteroidetes* ratio differs significantly at baseline, but not at follow-up; there is no difference in the *Prevotella/Bacteroides* ratio at either timepoint.

## Enterotypes

Enterotyping was run separately with the online (tool)[<http://enterotypes.org/>] using microbiota data summarized to genus level. Comparisons for this data:

```
# Import enterotyping results
pdET <- read.table("Inputs/enterotyping_results.txt", header = TRUE, sep = ",")
# Rename enterotypes with full names of dominant taxon:
levels(pdET$ET) <- c("Bacteroides", "Firmicutes", "Prevotella")

# Add metadata variables
pdET$Subject <- factor(substr(pdET$Sample, start = 1, stop = 5))
pdET$Parkinson <- factor(substr(pdET$Sample, start = 1, stop = 1))
levels(pdET$Parkinson) <- c("control", "Parkinson")
pdET$Timepoint <- factor(substr(pdET$Sample, start = 6, stop = 6), levels=c("0", "N"))
levels(pdET$Timepoint) <- c("baseline", "follow-up")

# Summary table of frequencies
pdETsummaries <- as.data.frame(table(pdET$Parkinson, pdET$ET, pdET$Timepoint))
colnames(pdETsummaries) <- c("Parkinson", "ET", "Timepoint", "Freq")
levels(pdETsummaries$Timepoint) <- c("baseline", "follow-up")

# Table and summary with PD split by progression category
pdETprog <- data.frame(pdET, ProgCat = pdclin[as.character(pdET$Sample), "ProgCat"])
pdETprog <- subset(pdETprog, !is.na(pdETprog$ProgCat))
pdETprog <- rbind(pdETprog[, c("Sample", "ET", "ProgCat", "Timepoint")], data.frame(subset(pdET,
  Parkinson=="control"), c("Sample", "ET", "Timepoint"), ProgCat="control"))
pdETprog$ProgCat <- factor(pdETprog$ProgCat, levels = c("control", "stable", "progressed"))

pdETsummariesProg <- as.data.frame(table(pdETprog$ProgCat, pdETprog$ET, pdETprog$Timepoint))
colnames(pdETsummariesProg) <- c("ProgCat", "ET", "Timepoint", "Freq")

# Statistical significances for the differences in distributions
set.seed(45877298)

# Table for collecting results
chisqETres <- as.data.frame(matrix(ncol = 3, nrow = 4))
colnames(chisqETres) <- c("Comparison", "p_baseline", "p_followup")
chisqETres$Comparison <- c("PD vs control", "prog vs stable", "prog vs control", "stable vs control")

# PD vs C
chisqETres[1, 2] <- chisq.test(as.matrix(table(subset(pdET, Timepoint == "baseline"),
  c("Parkinson", "ET")))))$p.value
chisqETres[1, 3] <- chisq.test(as.matrix(table(subset(pdET, Timepoint == "follow-up"),
  c("Parkinson", "ET")))))$p.value

# Progressed vs stable
chisqETres[2, 2] <- chisq.test(as.matrix(table(subset(pdETprog, Timepoint == "baseline" & ProgCat !=
  "control"), c("ProgCat", "ET")))[2:3, ], simulate.p.value = TRUE)$p.value
chisqETres[2, 3] <- chisq.test(as.matrix(table(subset(pdETprog, Timepoint == "follow-up" & ProgCat
  != "control"), c("ProgCat", "ET")))[2:3, ], simulate.p.value = TRUE)$p.value
```

```

## Progressed vs controls
chisqETres[3, 2] <- chisq.test(as.matrix(table(subset(pdETprog, Timepoint == "baseline" & ProgCat !=
  "stable")[, c("ProgCat", "ET")]))[c(1,3),], simulate.p.value = TRUE)$p.value
chisqETres[3, 3] <- chisq.test(as.matrix(table(subset(pdETprog, Timepoint == "follow-up" & ProgCat
  != "stable")[, c("ProgCat", "ET")]))[c(1,3),], simulate.p.value = TRUE)$p.value

# Stable vs controls
chisqETres[4, 2] <- chisq.test(as.matrix(table(subset(pdETprog, Timepoint == "baseline" & ProgCat !=
  "progressed")[, c("ProgCat", "ET")]))[1:2, ], simulate.p.value = TRUE)$p.value
chisqETres[4, 3] <- chisq.test(as.matrix(table(subset(pdETprog, Timepoint == "follow-up" & ProgCat
  != "progressed")[, c("ProgCat", "ET")]))[1:2, ], simulate.p.value = TRUE)$p.value

kable_styling(kable(chisqETres, digits = 4), full_width = FALSE)

```

| Comparison        | p_baseline | p_followup |
|-------------------|------------|------------|
| PD vs control     | 0.0441     | 0.0250     |
| prog vs stable    | 0.0160     | 0.2909     |
| prog vs control   | 0.0005     | 0.0430     |
| stable vs control | 0.3893     | 0.3053     |

**Figure 5**

A plot of the enterotype distributions:

```

# Reorganizing the tables

## Control + progression into percentages
pdETsummariesProgPerc <- dcast(pdETsummariesProg, ProgCat + Timepoint ~ ET, value.var = "Freq")
pdETsummariesProgPerc[, c("Bacteroides", "Firmicutes", "Prevotella")] <-
  prop.table(as.matrix(pdETsummariesProgPerc[, c("Bacteroides", "Firmicutes", "Prevotella"))], 1)
  * 100
pdETsummariesProgPerc <- melt(pdETsummariesProgPerc)

levels(pdETsummariesProgPerc$ProgCat) <- c(paste("Control\n\n=", nrow(subset(pdETprog, ProgCat ==
  "control")) / 2, sep = ""), paste("PD: stable\n\n=", nrow(subset(pdETprog, ProgCat == "stable"))
  / 2, sep = ""), paste("PD: progressed\n\n=", nrow(subset(pdETprog, ProgCat == "progressed")) / 2,
  sep = ""))

# Plot

fig5 <- ggplot(pdETsummariesProgPerc, aes(x = variable, y = value, fill = variable)) +
  geom_bar(stat = "identity", position = position_dodge(), color = "black", width = 0.75, size =
  0.4) +
  theme_bw(base_size = 10) +
  ylab("% of samples") +
  xlab("Enterotype") +
  facet_grid(Timepoint ~ ProgCat) +
  scale_fill_manual(values = c("antiquewhite4", "aquamarine4", "thistle3"), name = "Enterotype") +
  theme(panel.grid.major.x = element_blank(),
    panel.grid.minor.x = element_blank(),
    panel.grid.major.y = element_line(color = "gray70", size = 0.4),
    panel.grid.minor.y = element_blank(),
    strip.background = element_rect(fill = "white"),
    legend.position = "none",
    axis.text.x = element_text(color = "black", face = "italic", angle = 50, hjust = 1, vjust
    = 1),
    axis.text.y = element_text(color = "black"))
fig5

```

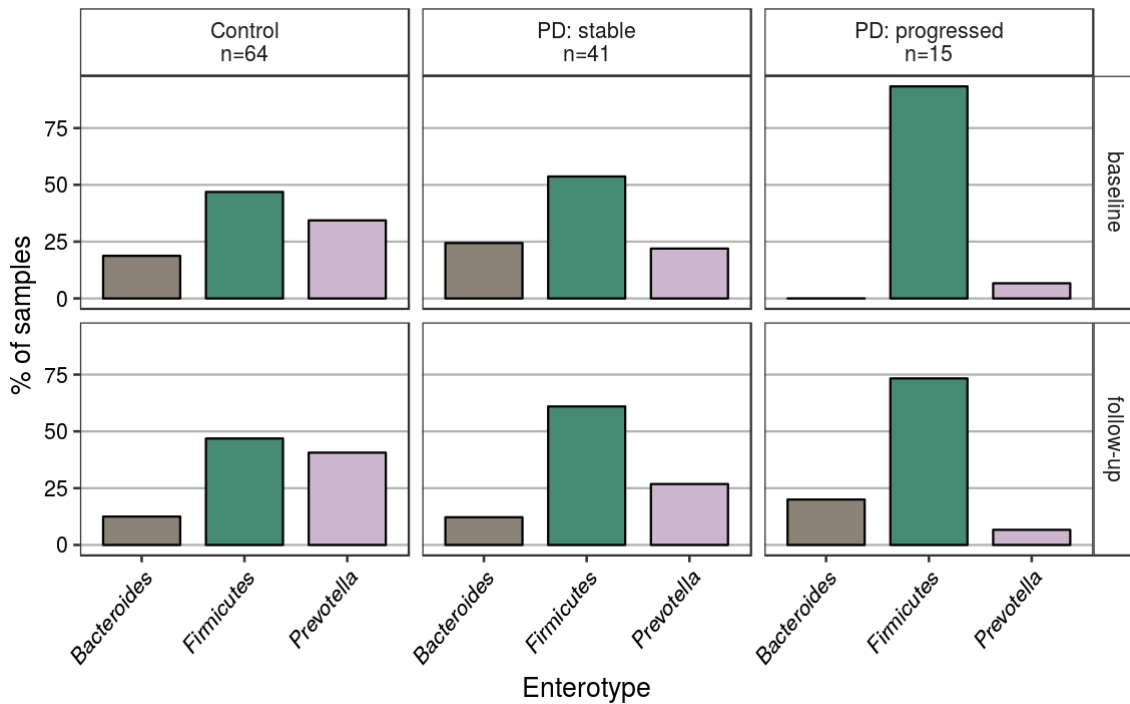

```
## Export to pdf
ggsave(fig5, filename = "Outputs/figure5.pdf", device = cairo_pdf,
       width = halfpage, height = 2.75, units = "in")
```

## Alpha diversity analyses

### PD vs control

#### Correlations with confounders

Calculate Pearson's correlations for all variables and three alpha diversity measures:

```
# Data frame with alpha diversity data
pdDivs <- cbind(pdclin, estimate_richness(newPD, measures = c("Observed", "Shannon", "InvSimpson")))
pdDivs$Parkinson <- factor(pdDivs$Parkinson, labels = c("control", "Parkinson"))

# Calculating correlations for all variables (except those with lots of missing values)

# List of variables to use
divVars <- colnames(pdDivs)[which(colSums(is.na(pdDivs))<50)]
divVars <- divVars[-which(divVars %in% c("Observed", "Shannon", "InvSimpson"))]

# Run correlations
divCors <- t(sapply(divVars, function(x) c(
  unname(unlist(cor.test(y = as.numeric(pdDivs[,x]), x = pdDivs$Observed)[c("estimate",
    "p.value")])),
  unname(unlist(cor.test(y = as.numeric(pdDivs[,x]), x = pdDivs$Shannon)[c("estimate", "p.value")])),
  unname(unlist(cor.test(y = as.numeric(pdDivs[,x]), x = pdDivs$InvSimpson)[c("estimate",
    "p.value"])])))))
colnames(divCors) <- c("ObsCor", "ObsP", "ShanCor", "ShanP", "InvSCor", "InvSP")
divCors <- data.frame(Var = divVars, divCors)

# Multiple comparison corrections
divCors$ObsPAdj <- p.adjust(divCors$ObsP, method = "fdr")
divCors$ShanPAdj <- p.adjust(divCors$ShanP, method = "fdr")
divCors$InvSPAdj <- p.adjust(divCors$InvSP, method = "fdr")
```

Export the results for variables that are significant for at least one comparison for the manuscript:

**Table 5**

```
divCorExp <- rbind(divCors[c("Parkinson", "Timepoint"),], subset(divCors, rowSums(divCors[, c(3, 5, 7)] < 0.05) > 0))
kable_styling(kable(divCorExp, digits = 3), font_size = 10)
```

|                                                                     | Var                                                                 | ObsCor | ObsP  | ShanCor | ShanP | InvSCor | InvSP | ObsPAdj | ShanPAdj | InvSPAdj |
|---------------------------------------------------------------------|---------------------------------------------------------------------|--------|-------|---------|-------|---------|-------|---------|----------|----------|
| Parkinson                                                           | Parkinson                                                           | 0.005  | 0.942 | -0.023  | 0.718 | -0.026  | 0.678 | 0.990   | 0.908    | 0.915    |
| Timepoint                                                           | Timepoint                                                           | 0.104  | 0.098 | 0.042   | 0.506 | 0.055   | 0.382 | 0.496   | 0.832    | 0.873    |
| BMI                                                                 | BMI                                                                 | -0.200 | 0.001 | -0.159  | 0.012 | -0.129  | 0.041 | 0.057   | 0.190    | 0.417    |
| history_-<br>lactosein-<br>tolerance                                | history_-<br>lactosein-<br>tolerance                                | 0.129  | 0.039 | 0.116   | 0.063 | 0.108   | 0.086 | 0.280   | 0.517    | 0.579    |
| history_-<br>colon_-<br>irritabile                                  | history_-<br>colon_-<br>irritabile                                  | 0.149  | 0.017 | 0.116   | 0.064 | 0.131   | 0.036 | 0.232   | 0.517    | 0.417    |
| history_-<br>hy-<br>pothyreo-<br>sis                                | history_-<br>hy-<br>pothyreo-<br>sis                                | 0.161  | 0.010 | 0.078   | 0.212 | 0.031   | 0.618 | 0.199   | 0.832    | 0.894    |
| history_-<br>hyper-<br>thyreosis                                    | history_-<br>hyper-<br>thyreosis                                    | -0.034 | 0.591 | -0.143  | 0.022 | -0.110  | 0.078 | 0.970   | 0.299    | 0.576    |
| history_-<br>appendec-<br>tomy                                      | history_-<br>appendec-<br>tomy                                      | -0.054 | 0.392 | -0.133  | 0.034 | -0.110  | 0.078 | 0.970   | 0.388    | 0.576    |
| history_-<br>hernia_-<br>repair                                     | history_-<br>hernia_-<br>repair                                     | 0.013  | 0.835 | 0.101   | 0.108 | 0.135   | 0.031 | 0.990   | 0.729    | 0.417    |
| history_-<br>CAD                                                    | history_-<br>CAD                                                    | 0.105  | 0.096 | 0.168   | 0.007 | 0.169   | 0.007 | 0.496   | 0.153    | 0.181    |
| history_-<br>ENT_-<br>surgery                                       | history_-<br>ENT_-<br>surgery                                       | 0.169  | 0.007 | 0.189   | 0.002 | 0.163   | 0.009 | 0.184   | 0.096    | 0.181    |
| tobacco_-<br>100_in_-<br>life                                       | tobacco_-<br>100_in_-<br>life                                       | 0.092  | 0.140 | 0.167   | 0.008 | 0.140   | 0.025 | 0.630   | 0.153    | 0.403    |
| Wexner_-<br>total                                                   | Wexner_-<br>total                                                   | 0.151  | 0.015 | 0.036   | 0.569 | 0.020   | 0.744 | 0.232   | 0.832    | 0.972    |
| Rome_-<br>III_-<br>constip_-<br>defec_-<br>sum_-<br>score_-<br>9.15 | Rome_-<br>III_-<br>constip_-<br>defec_-<br>sum_-<br>score_-<br>9.15 | 0.212  | 0.001 | 0.031   | 0.616 | 0.010   | 0.872 | 0.052   | 0.832    | 0.985    |
| Rome_-<br>III_-<br>IBS_-<br>criteria_-<br>fulfilled                 | Rome_-<br>III_-<br>IBS_-<br>criteria_-<br>fulfilled                 | 0.128  | 0.040 | 0.033   | 0.597 | -0.007  | 0.913 | 0.280   | 0.832    | 0.985    |
| meds_-<br>ca_-<br>antagonist                                        | meds_-<br>ca_-<br>antagonist                                        | 0.136  | 0.030 | 0.216   | 0.001 | 0.217   | 0.000 | 0.266   | 0.042    | 0.039    |
| meds_-<br>thyroxine                                                 | meds_-<br>thyroxine                                                 | 0.143  | 0.022 | 0.051   | 0.412 | 0.010   | 0.874 | 0.258   | 0.832    | 0.985    |
| selegeline_-<br>mg                                                  | selegeline_-<br>mg                                                  | -0.043 | 0.494 | -0.124  | 0.048 | -0.163  | 0.009 | 0.970   | 0.487    | 0.181    |
| pramipexole_-<br>mg                                                 | pramipexole_-<br>mg                                                 | -0.139 | 0.026 | -0.028  | 0.657 | -0.001  | 0.985 | 0.265   | 0.845    | 0.985    |
| FoodPC1                                                             | FoodPC1                                                             | -0.127 | 0.042 | -0.087  | 0.164 | -0.055  | 0.379 | 0.280   | 0.832    | 0.873    |

```
## Export
write.csv(divCorExp, "Outputs/table_5.csv")
```

A handful of variables have a significant *p*-value for all three indices (although only one, Ca channel antagonist use, also has significant multiple comparison corrected *p* for any of them).

The Parkinson status variable was not correlated with any of the diversity indices in a statistically significant manner. Contrast the Parkinson status and timepoint variables separately anyway:

### Differences between timepoints and PD status

```
## Only timepoints / only PD status, without subsetting
adiv_overall <- data.frame(
  # Differences between timepoints
  Timepoint = c(
    wilcox.test(data = pdDivs, Observed ~ Timepoint)$p.value,
    wilcox.test(data = pdDivs, Shannon ~ Timepoint)$p.value,
    wilcox.test(data = pdDivs, InvSimpson ~ Timepoint)$p.value),
  # Differences between PD and controls
  PD_vs_C = c(
    wilcox.test(data = pdDivs, Observed ~ Parkinson)$p.value,
    wilcox.test(data = pdDivs, Shannon ~ Parkinson)$p.value,
    wilcox.test(data = pdDivs, InvSimpson ~ Parkinson)$p.value),
  row.names = c("Observed", "Shannon", "Inverse Simpson"))

kable_styling(kable(adiv_overall, digits = 3), full_width = FALSE)
```

|                 | Timepoint | PD_vs_C |
|-----------------|-----------|---------|
| Observed        | 0.123     | 0.930   |
| Shannon         | 0.515     | 0.690   |
| Inverse Simpson | 0.273     | 0.635   |

```
## PD vs control with the timepoints separated

# Generic function for timepoint-separated contrasting of all three indices:
adivTab <- function(df, var){
  bl_df <- subset(df, Timepoint == "baseline")
  fu_df <- subset(df, Timepoint == "followup")

  adiv_res <- data.frame(
    Baseline = c(
      wilcox.test(data = bl_df, formula(paste("Observed ~", var)))$p.value,
      wilcox.test(data = bl_df, formula(paste("Shannon ~", var)))$p.value,
      wilcox.test(data = bl_df, formula(paste("InvSimpson ~", var)))$p.value),
    Followup = c(
      wilcox.test(data = fu_df, formula(paste("Observed ~", var)))$p.value,
      wilcox.test(data = fu_df, formula(paste("Shannon ~", var)))$p.value,
      wilcox.test(data = fu_df, formula(paste("InvSimpson ~", var)))$p.value),
    row.names = c("Observed", "Shannon", "Inverse Simpson"))

  return(adiv_res)
}

adiv_pdc_tpsep <- adivTab(pdDivs, "Parkinson")

kable_styling(kable(adiv_pdc_tpsep, digits = 3), full_width = FALSE)
```

|                 | Baseline | Followup |
|-----------------|----------|----------|
| Observed        | 0.830    | 0.909    |
| Shannon         | 0.922    | 0.677    |
| Inverse Simpson | 0.926    | 0.629    |

### ## Difference in timepoint within group

```
adiv_tp_pdcsep <- data.frame(
  # PD patients only
  PD_patients = c(
```



```

wilcox.test(data = subset(pdDivs, Parkinson == "Parkinson"), Observed ~ Timepoint)$p.value,
wilcox.test(data = subset(pdDivs, Parkinson == "Parkinson"), Shannon ~ Timepoint)$p.value,
wilcox.test(data = subset(pdDivs, Parkinson == "Parkinson"), InvSimpson ~ Timepoint)$p.value),
# Control subjects only
Controls = c(
  wilcox.test(data = subset(pdDivs, Parkinson == "control"), Observed ~ Timepoint)$p.value,
  wilcox.test(data = subset(pdDivs, Parkinson == "control"), Shannon ~ Timepoint)$p.value,
  wilcox.test(data = subset(pdDivs, Parkinson == "control"), InvSimpson ~ Timepoint)$p.value),
row.names = c("Observed", "Shannon", "Inverse Simpson"))

kable_styling(kable(adv_tp_pdcsep, digits = 3), full_width = FALSE)

```

|                 | PD_patients | Controls |
|-----------------|-------------|----------|
| Observed        | 0.337       | 0.228    |
| Shannon         | 0.802       | 0.522    |
| Inverse Simpson | 0.515       | 0.473    |

None of these comparisons suggest any differences in alpha diversity between timepoints or between the PD and control groups.

## PD vs control and confounders

### BMI

Some further exploration of the confounders that were significant:

```

# PD status and the three variables that had p < 0.05 for all three indices,
# looking for possible interactions

```

```
summary(lm(Observed ~ Parkinson * BMI, pdDivs)) # nothing for PD
```

```

##
## Call:
## lm(formula = Observed ~ Parkinson * BMI, data = pdDivs)
##
## Residuals:
##      Min       1Q   Median       3Q      Max
## -243.070  -57.991   -0.824   66.579  224.806
##
## Coefficients:
##              Estimate Std. Error t value Pr(>|t|)
## (Intercept)      582.092     63.857   9.116 < 2e-16 ***
## ParkinsonParkinson  -84.872     83.204  -1.020  0.30870
## BMI                -6.891      2.394  -2.878  0.00435 **
## ParkinsonParkinson:  3.328      3.080   1.081  0.28097
## ---
## Signif. codes:  0 '***' 0.001 '**' 0.01 '*' 0.05 '.' 0.1 ' ' 1
##
## Residual standard error: 95.85 on 247 degrees of freedom
## (5 observations deleted due to missingness)
## Multiple R-squared:  0.04511,    Adjusted R-squared:  0.03351
## F-statistic: 3.889 on 3 and 247 DF,  p-value: 0.009641

```

```
summary(lm(InvSimpson ~ Parkinson * BMI, pdDivs)) # an interaction?
```

```

##
## Call:
## lm(formula = InvSimpson ~ Parkinson * BMI, data = pdDivs)
##
## Residuals:
##      Min       1Q   Median       3Q      Max
##  -16.169  -5.568  -1.374   5.303  28.526
##
## Coefficients:

```

```
##           Estimate Std. Error t value Pr(>|t|)
## (Intercept)      35.9667    5.1870   6.934 3.56e-11 ***
## ParkinsonParkinson -14.8442    6.7585  -2.196 0.02899 *
## BMI              -0.5731    0.1945  -2.947 0.00352 **
## ParkinsonParkinson:BMI 0.5402    0.2502   2.159 0.03178 *
## ---
## Signif. codes:  0 '***' 0.001 '**' 0.01 '*' 0.05 '.' 0.1 ' ' 1
##
## Residual standard error: 7.786 on 247 degrees of freedom
## (5 observations deleted due to missingness)
## Multiple R-squared:  0.0355, Adjusted R-squared:  0.02378
## F-statistic:  3.03 on 3 and 247 DF,  p-value: 0.03003
```

```
summary(lm(Shannon ~ Parkinson * BMI, pdDivs)) # also an interaction?
```

```
##
## Call:
## lm(formula = Shannon ~ Parkinson * BMI, data = pdDivs)
##
## Residuals:
##      Min       1Q   Median       3Q      Max
## -1.05241 -0.23257  0.00035  0.27141  0.71003
##
## Coefficients:
##           Estimate Std. Error t value Pr(>|t|)
## (Intercept)    4.579313   0.227206  20.155 < 2e-16 ***
## ParkinsonParkinson -0.712663   0.296043  -2.407 0.016806 *
## BMI            -0.029233   0.008519  -3.431 0.000704 ***
## ParkinsonParkinson:BMI 0.026078   0.010957   2.380 0.018074 *
## ---
## Signif. codes:  0 '***' 0.001 '**' 0.01 '*' 0.05 '.' 0.1 ' ' 1
##
## Residual standard error: 0.341 on 247 degrees of freedom
## (5 observations deleted due to missingness)
## Multiple R-squared:  0.0476, Adjusted R-squared:  0.03603
## F-statistic: 4.115 on 3 and 247 DF,  p-value: 0.007148
```

```
summary(lm(Observed ~ Parkinson * history_ENT_surgery, pdDivs)) # no
```

```
##
## Call:
## lm(formula = Observed ~ Parkinson * history_ENT_surgery, data = pdDivs)
##
## Residuals:
##      Min       1Q   Median       3Q      Max
## -230.971 -62.217  -8.074   68.166  257.577
##
## Coefficients:
##           Estimate Std. Error t value
## (Intercept)    387.149    9.679  39.998
## ParkinsonParkinson    10.822   13.655   0.793
## history_ENT_surgery1    63.851   21.075   3.030
## ParkinsonParkinson:history_ENT_surgery1 -46.399   30.014  -1.546
##
##           Pr(>|t|)
## (Intercept) <2e-16 ***
## ParkinsonParkinson    0.4288
## history_ENT_surgery1    0.0027 **
## ParkinsonParkinson:history_ENT_surgery1    0.1234
## ---
## Signif. codes:  0 '***' 0.001 '**' 0.01 '*' 0.05 '.' 0.1 ' ' 1
##
## Residual standard error: 97.27 on 252 degrees of freedom
## Multiple R-squared:  0.03762, Adjusted R-squared:  0.02617
## F-statistic: 3.284 on 3 and 252 DF,  p-value: 0.02146
```

```
summary(lm(InvSimpson ~ Parkinson * history_ENT_surgery, pdDivs)) # no
```

```
##  
## Call:  
## lm(formula = InvSimpson ~ Parkinson * history_ENT_surgery, data = pdDivs)  
##  
## Residuals:  
##      Min       1Q   Median       3Q      Max   
## -16.213  -5.640  -1.635   4.943  31.232   
##  
## Coefficients:  
##              Estimate Std. Error t value  
## (Intercept)      20.03663    0.77823  25.746  
## ParkinsonParkinson      -0.36549    1.09788  -0.333  
## history_ENT_surgery1     3.21030    1.69446   1.895  
## ParkinsonParkinson:history_ENT_surgery1 -0.09712    2.41321  -0.040  
##              Pr(>|t|)  
## (Intercept)          <2e-16 ***  
## ParkinsonParkinson      0.7395  
## history_ENT_surgery1     0.0593 .  
## ParkinsonParkinson:history_ENT_surgery1  0.9679  
## ---  
## Signif. codes:  0 '***' 0.001 '**' 0.01 '*' 0.05 '.' 0.1 ' ' 1  
##  
## Residual standard error: 7.821 on 252 degrees of freedom  
## Multiple R-squared:  0.02721,    Adjusted R-squared:  0.01563  
## F-statistic: 2.349 on 3 and 252 DF,  p-value: 0.07301
```

```
summary(lm(Shannon ~ Parkinson * history_ENT_surgery, pdDivs)) # no
```

```
##  
## Call:  
## lm(formula = Shannon ~ Parkinson * history_ENT_surgery, data = pdDivs)  
##  
## Residuals:  
##      Min       1Q   Median       3Q      Max   
## -1.02060 -0.23367 -0.00376  0.25992  0.85778   
##  
## Coefficients:  
##              Estimate Std. Error t value  
## (Intercept)      3.757001    0.034427 109.129  
## ParkinsonParkinson      0.006612    0.048568   0.136  
## history_ENT_surgery1     0.213972    0.074959   2.855  
## ParkinsonParkinson:history_ENT_surgery1 -0.102616    0.106755  -0.961  
##              Pr(>|t|)  
## (Intercept)          < 2e-16 ***  
## ParkinsonParkinson      0.89181  
## history_ENT_surgery1     0.00467 **  
## ParkinsonParkinson:history_ENT_surgery1  0.33736  
## ---  
## Signif. codes:  0 '***' 0.001 '**' 0.01 '*' 0.05 '.' 0.1 ' ' 1  
##  
## Residual standard error: 0.346 on 252 degrees of freedom  
## Multiple R-squared:  0.03974,    Adjusted R-squared:  0.02831  
## F-statistic: 3.477 on 3 and 252 DF,  p-value: 0.01663
```

```
summary(lm(Observed ~ Parkinson * meds_ca_antagonist, pdDivs)) # neither variable significant on  
their own
```

```
##  
## Call:  
## lm(formula = Observed ~ Parkinson * meds_ca_antagonist, data = pdDivs)  
##
```

```
## Residuals:
##      Min       1Q   Median       3Q      Max
## -251.348  -65.829   -4.403   64.990  240.597
##
## Coefficients:
##              Estimate Std. Error t value
## (Intercept)      397.829      9.499  41.881
## ParkinsonParkinson      -3.425     13.033  -0.263
## meds_ca_antagonist1     15.519     22.409   0.693
## ParkinsonParkinson:meds_ca_antagonist1  85.633     40.429   2.118
##              Pr(>|t|)
## (Intercept)      <2e-16 ***
## ParkinsonParkinson      0.7929
## meds_ca_antagonist1     0.4892
## ParkinsonParkinson:meds_ca_antagonist1  0.0351 *
## ---
## Signif. codes:  0 '***' 0.001 '**' 0.01 '*' 0.05 '.' 0.1 ' ' 1
##
## Residual standard error: 97.34 on 252 degrees of freedom
## Multiple R-squared:  0.03641,    Adjusted R-squared:  0.02494
## F-statistic: 3.174 on 3 and 252 DF,  p-value: 0.02482
```

```
summary(lm(InvSimpson ~ Parkinson * meds_ca_antagonist, pdDivs)) # no
```

```
##
## Call:
## lm(formula = InvSimpson ~ Parkinson * meds_ca_antagonist, data = pdDivs)
##
## Residuals:
##      Min       1Q   Median       3Q      Max
## -15.662  -5.638  -1.520   5.021  27.123
##
## Coefficients:
##              Estimate Std. Error t value
## (Intercept)      19.9620      0.7539  26.478
## ParkinsonParkinson      -0.1829     1.0344  -0.177
## meds_ca_antagonist1     4.1838     1.7785   2.352
## ParkinsonParkinson:meds_ca_antagonist1  3.2740     3.2087   1.020
##              Pr(>|t|)
## (Intercept)      <2e-16 ***
## ParkinsonParkinson      0.8598
## meds_ca_antagonist1     0.0194 *
## ParkinsonParkinson:meds_ca_antagonist1  0.3085
## ---
## Signif. codes:  0 '***' 0.001 '**' 0.01 '*' 0.05 '.' 0.1 ' ' 1
##
## Residual standard error: 7.725 on 252 degrees of freedom
## Multiple R-squared:  0.05089,    Adjusted R-squared:  0.03959
## F-statistic: 4.504 on 3 and 252 DF,  p-value: 0.004247
```

```
summary(lm(Shannon ~ Parkinson * meds_ca_antagonist, pdDivs)) # 0.1 > p > 0.05, no significance for
PD
```

```
##
## Call:
## lm(formula = Shannon ~ Parkinson * meds_ca_antagonist, data = pdDivs)
##
## Residuals:
##      Min       1Q   Median       3Q      Max
## -1.03760 -0.22850  0.01048  0.26130  0.68915
##
## Coefficients:
##              Estimate Std. Error t value
```

```
## (Intercept)                3.77400    0.03345 112.815
## ParkinsonParkinson         -0.01575    0.04590  -0.343
## meds_ca_antagonist1        0.15657    0.07892   1.984
## ParkinsonParkinson:meds_ca_antagonist1 0.24135    0.14238   1.695
##
##                               Pr(>|t|)
## (Intercept)                <2e-16 ***
## ParkinsonParkinson         0.7318
## meds_ca_antagonist1        0.0483 *
## ParkinsonParkinson:meds_ca_antagonist1 0.0913 .
## ---
## Signif. codes:  0 '***' 0.001 '**' 0.01 '*' 0.05 '.' 0.1 ' ' 1
##
## Residual standard error: 0.3428 on 252 degrees of freedom
## Multiple R-squared:  0.05741,    Adjusted R-squared:  0.04619
## F-statistic: 5.116 on 3 and 252 DF,  p-value: 0.001878
```

The potential BMI \* PD interaction seems worth exploring in more detail. (Here done without taking into account the timepoint for the samples, so technically this is pseudoreplicated data.)

```
# Make models with and without interaction for each diversity index
lmObsM1 <- summary(lm(Observed ~ Parkinson + BMI, pdDivs))
lmObsM2 <- summary(lm(Observed ~ Parkinson * BMI, pdDivs))
lmShanM1 <- summary(lm(Shannon ~ Parkinson + BMI, pdDivs))
lmShanM2 <- summary(lm(Shannon ~ Parkinson * BMI, pdDivs))
lmInvSM1 <- summary(lm(InvSimpson ~ Parkinson + BMI, pdDivs))
lmInvSM2 <- summary(lm(InvSimpson ~ Parkinson * BMI, pdDivs))

modlist <- list(lmObsM1, lmShanM1, lmInvSM1, lmObsM2, lmShanM2, lmInvSM2)

# Make a table with values extracted from these
bmiPDlm <- as.data.frame(matrix(ncol = 5, nrow = (3 * 4 + 3 * 5)))
colnames(bmiPDlm) <- c("Model", "Variable", "adjRsquared", "Estimate", "pval")
bmiPDlm$Model <- c(rep(c("Observed richness ~ PD + BMI", "Shannon ~ PD + BMI", "InvS ~ PD + BMI"),
  each = 4),
  rep(c("Observed richness ~ PD * BMI", "Shannon ~ PD * BMI", "InvS ~ PD * BMI"),
  each = 5))
bmiPDlm$Model <- factor(bmiPDlm$Model, levels=c("Observed richness ~ PD + BMI", "Observed richness ~
  PD * BMI",
  "Shannon ~ PD + BMI", "Shannon ~ PD * BMI",
  "InvS ~ PD + BMI", "InvS ~ PD * BMI"))
bmiPDlm$Variable <- c(rep(c("model", "Intercept", "PD", "BMI"), 3),
  rep(c("model", "Intercept", "PD", "BMI", "PD:BMI"), 3))

# R-squared
bmiPDlm[bmiPDlm$Variable == "model", "adjRsquared"] <- unlist(sapply(modlist, function(x)
  x["adj.r.squared"]))

# P-value for full model
bmiPDlm[bmiPDlm$Variable == "model", "pval"] <- sapply(modlist, function(x)
  pf(unlist(x["fstatistic"])[1], unlist(x["fstatistic"])[2], unlist(x["fstatistic"])[3], lower =
  FALSE))

# P-values
bmiPDlm[bmiPDlm$Variable!="model", "pval"] <- c(
  as.vector(unlist(sapply(modlist[1:3], function(x) x$coefficients[1:3, "Pr(>|t|)"]))),
  as.vector(unlist(sapply(modlist[4:6], function(x) x$coefficients[1:4, "Pr(>|t|)"]))))

# Estimates
bmiPDlm[bmiPDlm$Variable!="model", "Estimate"] <- c(
  as.vector(unlist(sapply(modlist[1:3], function(x) x$coefficients[1:3, "Estimate"]))),
  as.vector(unlist(sapply(modlist[4:6], function(x) x$coefficients[1:4, "Estimate"]))))

# Order by model levels
```

```
bmiPDlm <- bmiPDlm[order(bmiPDlm$Model),]
rownames(bmiPDlm) <- NULL
```

## Table S2A

Export the results:

```
kable_styling(kable(bmiPDlm, digits = 3), font_size = 10, full_width = FALSE)
```

| Model                        | Variable  | adjRsquared | Estimate | pval  |
|------------------------------|-----------|-------------|----------|-------|
| Observed richness ~ PD + BMI | model     | 0.033       | NA       | 0.006 |
| Observed richness ~ PD + BMI | Intercept | NA          | 528.932  | 0.000 |
| Observed richness ~ PD + BMI | PD        | NA          | 4.066    | 0.738 |
| Observed richness ~ PD + BMI | BMI       | NA          | -4.879   | 0.001 |
| Observed richness ~ PD * BMI | model     | 0.034       | NA       | 0.010 |
| Observed richness ~ PD * BMI | Intercept | NA          | 582.092  | 0.000 |
| Observed richness ~ PD * BMI | PD        | NA          | -84.872  | 0.309 |
| Observed richness ~ PD * BMI | BMI       | NA          | -6.891   | 0.004 |
| Observed richness ~ PD * BMI | PD:BMI    | NA          | 3.328    | 0.281 |
| Shannon ~ PD + BMI           | model     | 0.018       | NA       | 0.039 |
| Shannon ~ PD + BMI           | Intercept | NA          | 4.163    | 0.000 |
| Shannon ~ PD + BMI           | PD        | NA          | -0.016   | 0.720 |
| Shannon ~ PD + BMI           | BMI       | NA          | -0.013   | 0.013 |
| Shannon ~ PD * BMI           | model     | 0.036       | NA       | 0.007 |
| Shannon ~ PD * BMI           | Intercept | NA          | 4.579    | 0.000 |
| Shannon ~ PD * BMI           | PD        | NA          | -0.713   | 0.017 |
| Shannon ~ PD * BMI           | BMI       | NA          | -0.029   | 0.001 |
| Shannon ~ PD * BMI           | PD:BMI    | NA          | 0.026    | 0.018 |
| InvS ~ PD + BMI              | model     | 0.009       | NA       | 0.115 |
| InvS ~ PD + BMI              | Intercept | NA          | 27.337   | 0.000 |
| InvS ~ PD + BMI              | PD        | NA          | -0.406   | 0.683 |
| InvS ~ PD + BMI              | BMI       | NA          | -0.247   | 0.046 |
| InvS ~ PD * BMI              | model     | 0.024       | NA       | 0.030 |
| InvS ~ PD * BMI              | Intercept | NA          | 35.967   | 0.000 |
| InvS ~ PD * BMI              | PD        | NA          | -14.844  | 0.029 |
| InvS ~ PD * BMI              | BMI       | NA          | -0.573   | 0.004 |
| InvS ~ PD * BMI              | PD:BMI    | NA          | 0.540    | 0.032 |

```
## Export
write.csv(bmiPDlm, "Outputs/table_s2a.csv")
```

Plot for the interaction for Shannon & inverse Simpson:

```
# Make models with timepoint included
shanM2mod <- lm(Shannon ~ Timepoint + Parkinson * BMI, pdDivs)
invsM2mod <- lm(InvSimpson ~ Timepoint + Parkinson * BMI, pdDivs)

# Make predicted data based on these models and plot

# Shannon

shannonPred <- data.frame(Shannon = predict(shanM2mod, pdDivs, se.fit = TRUE),
                          Parkinson = pdDivs$Parkinson,
                          BMI = pdDivs$BMI,
                          Timepoint = pdDivs$Timepoint)
colnames(shannonPred)[1] <- "Shannon"
shannonPred$ymin <- shannonPred$Shannon - shannonPred$Shannon.se.fit
shannonPred$ymax <- shannonPred$Shannon + shannonPred$Shannon.se.fit

bmiAlphaShan <- ggplot(pdDivs, aes(x = BMI, y = Shannon, color = Timepoint, shape = Timepoint)) +
  ggtitle("A.") +
  geom_point() +
  facet_grid(~Parkinson) +
  theme_bw() +
  scale_color_manual(values = c("gray20", "seagreen")) +
  geom_ribbon(data = shannonPred, aes(ymin = ymin, ymax = ymax), fill = "grey70", alpha = 0.5, col =
    NA) +
  geom_line(data = shannonPred, aes(x = BMI, y = Shannon, color = Timepoint)) +
  ylab("Shannon") +
  theme(panel.grid = element_blank(), legend.position = "bottom")
```

```

# Inverse Simpson

invsPred <- data.frame(InvSimpson = predict(invsM2mod, pdDivs, se.fit = TRUE),
  Parkinson = pdDivs$Parkinson,
  BMI = pdDivs$BMI,
  Timepoint = pdDivs$Timepoint)
colnames(invsPred)[1] <- "InvSimpson"
invsPred$ymin <- invsPred$InvSimpson - invsPred$InvSimpson.se.fit
invsPred$ymax <- invsPred$InvSimpson + invsPred$InvSimpson.se.fit

bmiAlphaInvS <- ggplot(pdDivs, aes(x = BMI, y = InvSimpson, color = Timepoint, shape = Timepoint)) +
  ggtitle("B.") +
  geom_point() +
  facet_grid(~Parkinson) +
  theme_bw() +
  scale_color_manual(values = c("gray20", "seagreen")) +
  geom_ribbon(data = invsPred, aes(ymin = ymin, ymax = ymax),
    fill = "grey70", alpha = 0.5, col = NA) +
  geom_line(data = invsPred, aes(x = BMI, y = InvSimpson, color = Timepoint)) +
  ylab("Inverse Simpson") +
  theme(panel.grid = element_blank(), legend.position = "bottom")

```

## Victoria Bowel Performance Scale (BPS)

This additional variable was explored due to the literature reports of stool consistency being associated with alpha diversity, and was only available at follow-up.

```

# Make a subset of follow-up data for these analyses
newPD_FU <- subset_samples(newPD, Timepoint == "followup")

# Import BPS data
bps_df <- read.csv("Inputs/bps_data.csv", sep = "\t", row.names = 1)
rownames(bps_df) <- paste(rownames(bps_df), "N", sep="")
bps_df <- bps_df[rownames(sample_data(newPD_FU)),]
bps_df$Parkinson <- sample_data(newPD_FU)$Parkinson

# Make a categorical BPS variable
bps_df$BPSCat <- cut(bps_df$Stool_diary_D1_characteristic_average, breaks = c(-3.1, -2.5, -1.5,
  -0.5, 0.5, 1.5, 2.5, 3))
levels(bps_df$BPSCat) <- c(-3, -2, -1, 0, 1, 2, 3)

# What does this data look like?
ggplot(bps_df, aes(x=BPSCat)) +
  geom_bar(color="black", fill="gray70") +
  xlab("Average BPS score") +
  ylab("Number of samples") +
  theme_bw() +
  facet_grid(~Parkinson) +
  theme(panel.grid.minor = element_blank(),
    panel.grid.major.x = element_blank(),
    panel.grid.major.y = element_line(color="black"),
    axis.text = element_text(color="black"))

```



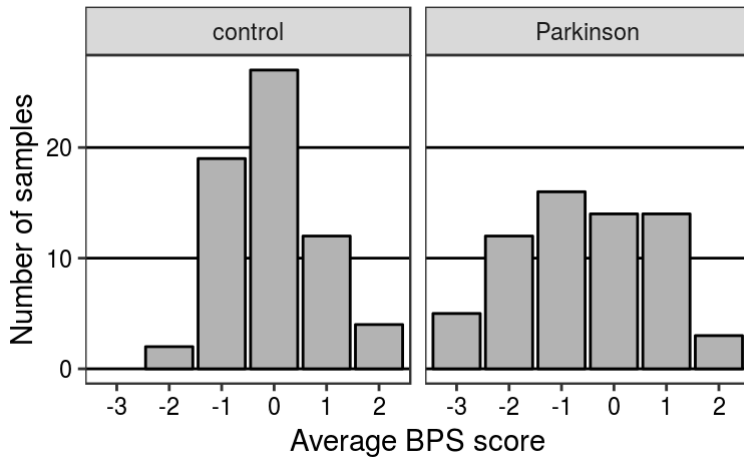

As could be expected, the PD patients have a wider spread of values here. Contrast alpha diversity and BPS, and collect the results into a table.

```
# Make a subset of the phyloseq object for follow-up only
newPD_FU <- phyloseq(otu_table(newPD_FU, taxa_are_rows=TRUE), tax_table(newPD_FU),
  sample_data(bps_df))

# Calculate diversity indices
bps_divs <- cbind(bps_df, estimate_richness(newPD_FU, measures = c("Observed", "Shannon",
  "InvSimpson")))

# Make models with and without interactions

lmObs_BPS1 <- summary(lm(Observed ~ Parkinson + Stool_diary_D1_characteristic_average, bps_divs))
lmObs_BPS2 <- summary(lm(Observed ~ Parkinson * Stool_diary_D1_characteristic_average, bps_divs))
lmShan_BPS1 <- summary(lm(Shannon ~ Parkinson + Stool_diary_D1_characteristic_average, bps_divs))
lmShan_BPS2 <- summary(lm(Shannon ~ Parkinson * Stool_diary_D1_characteristic_average, bps_divs))
lmInvS_BPS1 <- summary(lm(InvSimpson ~ Parkinson + Stool_diary_D1_characteristic_average, bps_divs))
lmInvS_BPS2 <- summary(lm(InvSimpson ~ Parkinson * Stool_diary_D1_characteristic_average, bps_divs))

modlist_BPS <- list(lmObs_BPS1, lmShan_BPS1, lmInvS_BPS1, lmObs_BPS2, lmShan_BPS2, lmInvS_BPS2)

# Collect values into a table, similarly to the BMI analyses

bpsPDlm <- as.data.frame(matrix(ncol = 5, nrow = (3 * 4 + 3 * 5)))
colnames(bpsPDlm) <- c("Model", "Variable", "adjRsquared", "Estimate", "pval")
bpsPDlm$Model <- c(rep(c("Observed richness ~ PD + BPS", "Shannon ~ PD + BPS", "InvS ~ PD + BPS"),
  each = 4),
  rep(c("Observed richness ~ PD * BPS", "Shannon ~ PD * BPS", "InvS ~ PD * BPS"),
  each = 5))
bpsPDlm$Variable <- c(rep(c("model", "Intercept", "PD", "BPS"), 3),
  rep(c("model", "Intercept", "PD", "BPS", "PD:BPS"), 3))
bpsPDlm$Model <- factor(bpsPDlm$Model, levels = c("Observed richness ~ PD + BPS", "Observed richness
  ~ PD * BPS",
  "Shannon ~ PD + BPS", "Shannon ~ PD * BPS", "InvS ~ PD + BPS", "InvS
  ~ PD * BPS"))

# R-squared
bpsPDlm[bpsPDlm$Variable == "model", "adjRsquared"] <- unlist(sapply(modlist_BPS, function(x)
  x["adj.r.squared"]))

# P-value for full model
bpsPDlm[bpsPDlm$Variable == "model", "pval"] <- sapply(modlist_BPS, function(x)
  pf(unlist(x["fstatistic"])[1], unlist(x["fstatistic"])[2], unlist(x["fstatistic"])[3], lower =
  FALSE))

# P-values for variables
```



```

bpsPDlm[bpsPDlm$Variable!="model", "pval"] <- c(
  as.vector(unlist(sapply(modlist_BPS[1:3], function(x) x$coefficients[1:3, "Pr(>|t|)"]))),
  as.vector(unlist(sapply(modlist_BPS[4:6], function(x) x$coefficients[1:4, "Pr(>|t|)"]))))

# Estimates
bpsPDlm[bpsPDlm$Variable!="model", "Estimate"] <- c(
  as.vector(unlist(sapply(modlist_BPS[1:3], function(x) x$coefficients[1:3, "Estimate"]))),
  as.vector(unlist(sapply(modlist_BPS[4:6], function(x) x$coefficients[1:4, "Estimate"]))))

# Order by model levels
bpsPDlm <- bpsPDlm[order(bpsPDlm$Model),]
rownames(bpsPDlm) <- NULL

```

## Table S2B

Export the results:

```
kable_styling(kable(bpsPDlm, digits = 3), font_size = 10, full_width = FALSE)
```

| Model                        | Variable  | adjRsquared | Estimate | pval  |
|------------------------------|-----------|-------------|----------|-------|
| Observed richness ~ PD + BPS | model     | 0.028       | NA       | 0.061 |
| Observed richness ~ PD + BPS | Intercept | NA          | 413.419  | 0.000 |
| Observed richness ~ PD + BPS | PD        | NA          | -11.715  | 0.492 |
| Observed richness ~ PD + BPS | BPS       | NA          | -17.430  | 0.019 |
| Observed richness ~ PD * BPS | model     | 0.083       | NA       | 0.003 |
| Observed richness ~ PD * BPS | Intercept | NA          | 414.484  | 0.000 |
| Observed richness ~ PD * BPS | PD        | NA          | -6.349   | 0.703 |
| Observed richness ~ PD * BPS | BPS       | NA          | -48.008  | 0.000 |
| Observed richness ~ PD * BPS | PD:BPS    | NA          | 44.563   | 0.004 |
| Shannon ~ PD + BPS           | model     | -0.011      | NA       | 0.754 |
| Shannon ~ PD + BPS           | Intercept | NA          | 3.822    | 0.000 |
| Shannon ~ PD + BPS           | PD        | NA          | -0.034   | 0.588 |
| Shannon ~ PD + BPS           | BPS       | NA          | -0.017   | 0.534 |
| Shannon ~ PD * BPS           | model     | 0.007       | NA       | 0.284 |
| Shannon ~ PD * BPS           | Intercept | NA          | 3.825    | 0.000 |
| Shannon ~ PD * BPS           | PD        | NA          | -0.021   | 0.731 |
| Shannon ~ PD * BPS           | BPS       | NA          | -0.087   | 0.067 |
| Shannon ~ PD * BPS           | PD:BPS    | NA          | 0.103    | 0.073 |
| InvS ~ PD + BPS              | model     | -0.015      | NA       | 0.913 |
| InvS ~ PD + BPS              | Intercept | NA          | 21.075   | 0.000 |
| InvS ~ PD + BPS              | PD        | NA          | -0.368   | 0.794 |
| InvS ~ PD + BPS              | BPS       | NA          | -0.233   | 0.701 |
| InvS ~ PD * BPS              | model     | -0.013      | NA       | 0.723 |
| InvS ~ PD * BPS              | Intercept | NA          | 21.108   | 0.000 |
| InvS ~ PD * BPS              | PD        | NA          | -0.200   | 0.888 |
| InvS ~ PD * BPS              | BPS       | NA          | -1.189   | 0.273 |
| InvS ~ PD * BPS              | PD:BPS    | NA          | 1.394    | 0.287 |

```

## Export
write.csv(bpsPDlm, "Outputs/table_s2b.csv")

```

There seems to be an interaction for PD and BPS for observed richness, but not for the two indices that include evenness. Make a plot for observed richness:

```

# Table
bpsObsM2 <- lm(Observed ~ Parkinson * Stool_diary_D1_characteristic_average, bps_divs)

bpsObsPred <- data.frame(Observed = predict(bpsObsM2, bps_divs, se.fit = TRUE),
  Parkinson = bps_divs$Parkinson,
  Stool_diary_D1_characteristic_average =
    bps_divs$Stool_diary_D1_characteristic_average)

bpsLMplot <- ggplot(bps_divs, aes(x=Stool_diary_D1_characteristic_average, y=Observed)) +
  ggtitle("C.") +
  facet_grid(~Parkinson) +
  geom_point() +
  theme_bw() +
  geom_ribbon(aes(ymin = bpsObsPred$Observed.fit - bpsObsPred$Observed.se.fit,
    ymax = bpsObsPred$Observed.fit + bpsObsPred$Observed.se.fit),
    fill = "grey70", alpha=0.5) +

```

```

geom_line(data = bpsObsPred, aes(x = Stool_diary_D1_characteristic_average, y = Observed.fit)) +
ylab("Observed richness") +
xlab("Average Victoria Bowel Performance Scale score") +
theme(panel.grid=element_blank())

```

## Plot the BMI and BPS models together

Figure 6

```

# Plot the three interaction + alpha diversity plots together:
fig6 <- arrangeGrob(bmiAlphaShan +
  theme_bw(base_size = 8) +
  theme(legend.position = "bottom", panel.grid = element_blank(),
    legend.box.margin = ggplot2::margin(c(-10,0,-10,0))),
  bmiAlphaInvS +
  theme_bw(base_size = 8) +
  theme(legend.position = "bottom", panel.grid = element_blank(),
    legend.box.margin = ggplot2::margin(c(-10,0,-10,0))),
  bpsLMplot +
  theme_bw(base_size = 8) +
  theme(legend.position = "bottom", panel.grid = element_blank()),
  ncol=1, heights=c(1.1,1.1,1))

grid.arrange(fig6)

```

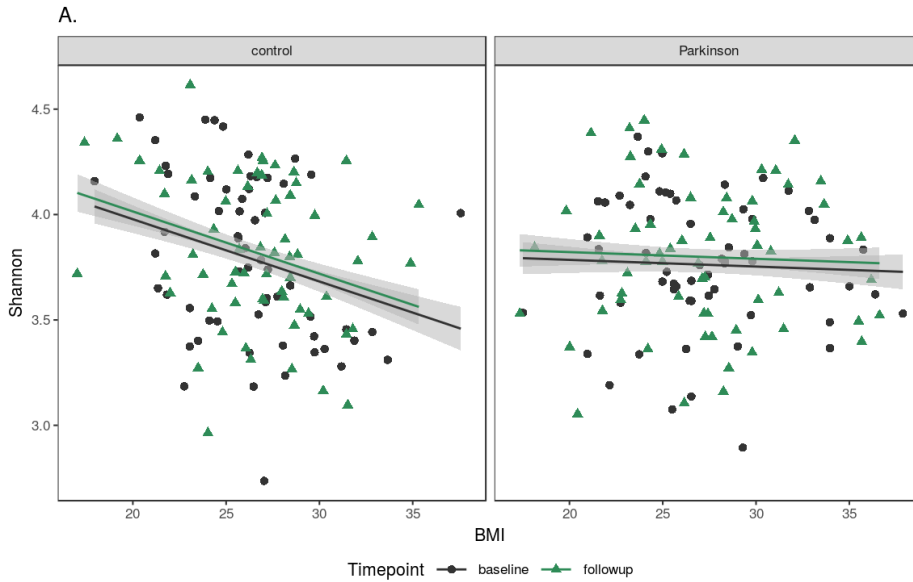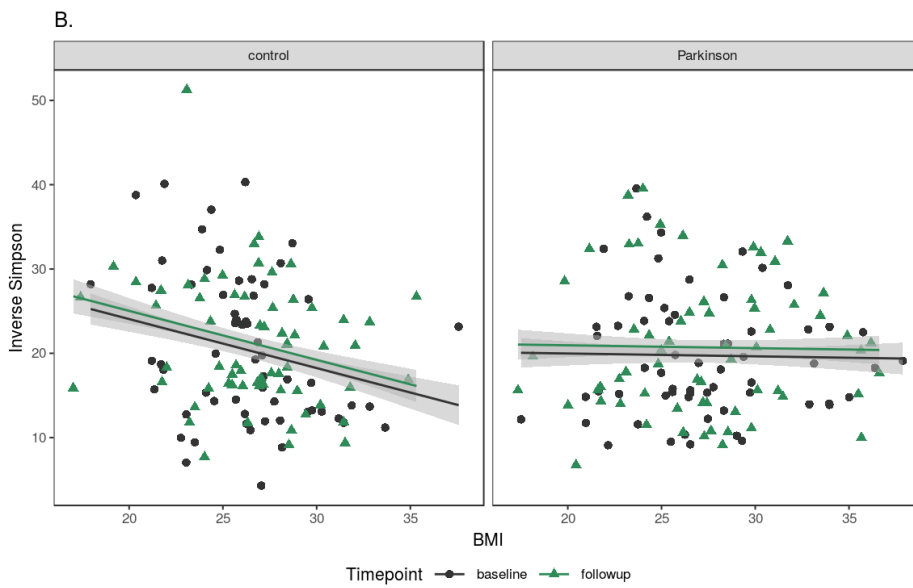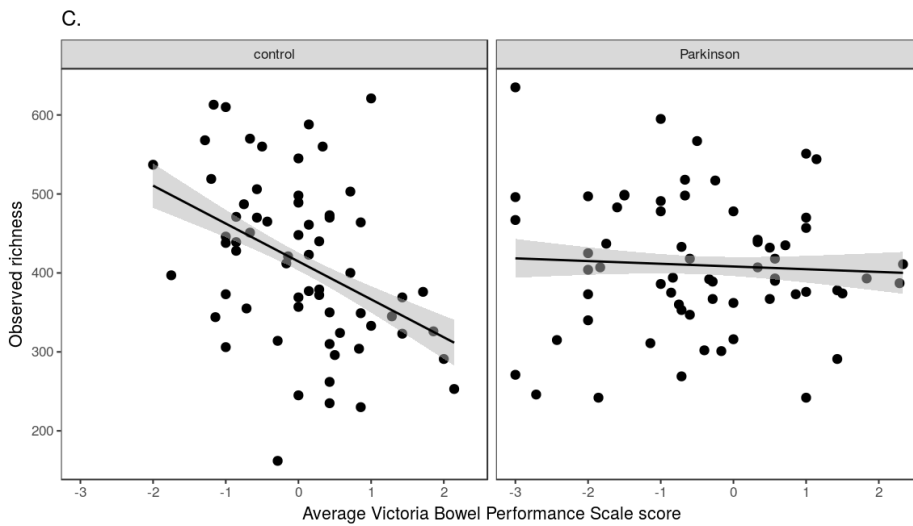

```
## Export to pdf
ggsave(fig6, filename = "Outputs/figure6.pdf", device = cairo_pdf,
       height = maxhi*0.7, width = halpage, units = "in")
```

## Progression

```
# Alpha diversity data for PD/progression only
```

```
pdDivsProg <- cbind(progmeta, estimate_richness(progPhy, measures=c("Observed",
  "Shannon", "InvSimpson")))

progDivRes <- adivTab(pdDivsProg, "ProgCat")

kable_styling(kable(progDivRes, digits = 3), full_width = FALSE)
```

|                 | Baseline | Followup |
|-----------------|----------|----------|
| Observed        | 0.482    | 0.215    |
| Shannon         | 0.441    | 0.647    |
| Inverse Simpson | 0.232    | 0.840    |

No differences in alpha diversity when contrasting stable and progressed PD patients at either timepoint.

## PD phenotypes (TD vs PIGD)

Simple contrasts of alpha diversity between the TD and PIGD groups, separately for each timepoint:

```
# Calculate diversity index values
pheRich <- estimate_richness(progPhyPhe, measures = c("Observed", "Shannon", "InvSimpson"))
pheRich <- cbind(pheRich, sample_data(progPhyPhe)[, c("JankovicClass", "Timepoint")])

pheDivRes <- adivTab(pheRich, "JankovicClass")

kable_styling(kable(pheDivRes, digits = 3), full_width = FALSE)
```

|                 | Baseline | Followup |
|-----------------|----------|----------|
| Observed        | 0.572    | 0.368    |
| Shannon         | 0.849    | 0.493    |
| Inverse Simpson | 0.568    | 0.762    |

No significant differences in alpha diversity between the phenotypes at either timepoint with any of the indices.

## Diet

Test all the variables of interest against three alpha diversity indices:

```
ffqDivs <- cbind(ffqmeta, estimate_richness(ffqPhy, measures = c("Observed", "Shannon",
  "InvSimpson")))

ffqDivsDiff <- as.data.frame(t(sapply(ffqVars, function (x)
  c(kruskal.test(x=ffqDivs$Observed, g=ffqDivs[[x]])$p.value,
    kruskal.test(x=ffqDivs$Shannon, g=ffqDivs[[x]])$p.value,
    kruskal.test(x=ffqDivs$InvSimpson, g=ffqDivs[[x]])$p.value))))

colnames(ffqDivsDiff) <- c("pObserved", "pShannon", "pInvSimpson")

# Is anything significant when unadjusted?
kable_styling(kable(subset(ffqDivsDiff, pObserved < 0.05 | pShannon < 0.05 | pInvSimpson < 0.05),
  digits = 3), full_width = FALSE)
```

|                  | pObserved | pShannon | pInvSimpson |
|------------------|-----------|----------|-------------|
| Kuitul_g_perlkkc | 0.410     | 0.042    | 0.180       |
| Jodi_perlkkc     | 0.481     | 0.021    | 0.017       |
| Karoteno_perlkkc | 0.187     | 0.015    | 0.091       |
| D_vitam_perlkkc  | 0.205     | 0.048    | 0.172       |
| Puuro_perlkkc    | 0.325     | 0.066    | 0.027       |
| Hedmeyh_perlkkc  | 0.037     | 0.025    | 0.160       |
| Olutyht_perlkkc  | 0.003     | 0.055    | 0.101       |

```
# Adjust for multiple comparisons
ffqDivsDiff$padjObserved <- p.adjust(ffqDivsDiff$pObserved, method = "fdr")
```

```
ffqDivsDiff$padjShannon <- p.adjust(ffqDivsDiff$pShannon, method = "fdr")
ffqDivsDiff$padjInvSimpson <- p.adjust(ffqDivsDiff$pInvSimpson, method = "fdr")

# Any significant adjusted p-values (or even anywhere close)?
nrow(subset(ffqDivsDiff, padjObserved < 0.1 | padjShannon < 0.1 | padjInvSimpson < 0.1))

## [1] 0

# no, nothing is
```

One potentially interesting variable that had a significant uncorrected  $p$ -value for Shannon diversity was fiber. Plot this separately:

```
ggplot(ffqDivs, aes(x=Kuitul_g_per1kkc, y=Shannon)) +
  geom_boxplot() +
  theme_bw() +
  ylab("Shannon diversity") +
  xlab("Insoluble fibre\n(g/1000kcal)") +
  theme(panel.grid=element_blank())
```

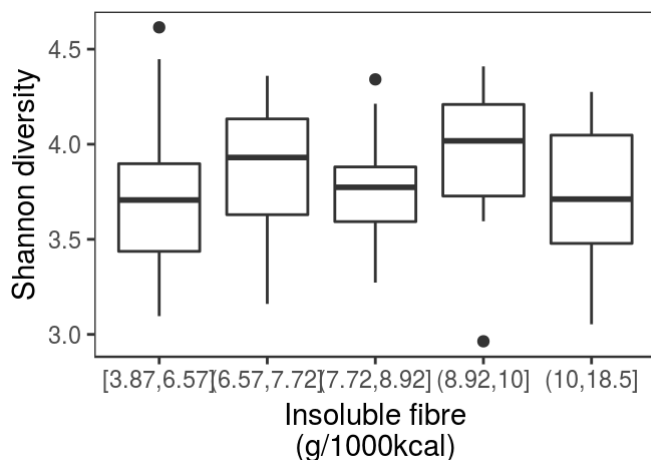

This doesn't look particularly clear; higher fiber consumption definitely doesn't seem to be linked with higher diversity.

## Beta diversity analyses

### PD vs control

#### Data setup

Set up data for the comparison, including dropping some subjects that had NA values for a few potential confounders:

```
# List of confounders from earlier metadata comparisons:
adVarsPDvsC
```

```
## [1] "age_at_stool_collection"
## [2] "BMI"
## [3] "gender"
## [4] "history_TIA_ischemic_stroke"
## [5] "meds_ACEI_ARB"
## [6] "meds_anticholinergic"
## [7] "meds_ca_antagonist"
## [8] "meds_statin"
## [9] "meds_Warfarin"
## [10] "MMSE_total"
## [11] "RLS"
## [12] "Rome_III_constip_defec_sumscore_9.15"
## [13] "Rome_III_IBS_criteria_fulfilled"
## [14] "Wexner_total"
## [15] "FoodPC1"
```

```
# Missing values check:
sort(colSums(is.na(sample_data(newPD)[,adVarsPDvsC])), decreasing = TRUE)
```

```
##          BMI          history_TIA_ischemic_stroke
##          5          2
##    age_at_stool_collection          gender
##          0          0
##          meds_ACEI_ARB          meds_anticholinergic
##          0          0
##          meds_ca_antagonist          meds_statin
##          0          0
##          meds_Warfarin          MMSE_total
##          0          0
##          RLS_Rome_III_constip_defec_sumscore_9.15
##          0          0
##    Rome_III_IBS_criteria_fulfilled          Wexner_total
##          0          0
##          FoodPC1
##          0
```

```
# Drop the subjects with NA values from the metadata:
pdmetaAD <- subset(pdclin, !is.na(pdclin$history_TIA_ischemic_stroke) & !is.na(pdclin$BMI))
```

```
# OTU level phyloseq object
newPD_R <- rarefy_even_depth(subset_samples(newPD,
  !is.na(sample_data(newPD)$history_TIA_ischemic_stroke) & !is.na(sample_data(newPD)$BMI)),
  rngseed = 521483)
```

```
# Genus level phyloseq object
newPDgen_R <- rarefy_even_depth(subset_samples(newPDgen,
  !is.na(sample_data(newPDgen)$history_TIA_ischemic_stroke) & !is.na(sample_data(newPDgen)$BMI)),
  rngseed = 113210)
```

```
# Family level phyloseq object
newPDFam_R <- rarefy_even_depth(subset_samples(newPDFam,
  !is.na(sample_data(newPDFam)$history_TIA_ischemic_stroke) & !is.na(sample_data(newPDFam)$BMI)),
  rngseed = 464519)
```

```
# Calculate distance matrices (with the default method, Bray-Curtis)
pddisOTU <- vegdist(t(as.data.frame(as.matrix(otu_table(newPD_R))))))
pddisGen <- vegdist(t(as.data.frame(as.matrix(otu_table(newPDgen_R))))))
pddisFam <- vegdist(t(as.data.frame(as.matrix(otu_table(newPDFam_R))))))
```

## ADONIS

Calculate significance for adonis models that just have timepoint and PD status without any confounders:

```
# OTU level
adTPPD_noconf_OTUs <- adonis2(pddisOTU ~ sample_data(newPD_R)[["Timepoint"]] +
  sample_data(newPD_R)[["Parkinson"]], perm = 9999, by = "margin")
adTPPD_noconf_OTUs
```

```
## Permutation test for adonis under reduced model
## Marginal effects of terms
## Permutation: free
## Number of permutations: 9999
##
## adonis2(formula = pddisOTU ~ sample_data(newPD_R)[["Timepoint"]] +
##   sample_data(newPD_R)[["Parkinson"]], permutations = 9999, by = "margin")
##          Df SumOfSqs      R2      F Pr(>F)
## sample_data(newPD_R)[["Timepoint"]]  1    0.174 0.00292 0.7314 0.8984
## sample_data(newPD_R)[["Parkinson"]]  1    0.907 0.01522 3.8146 0.0001 ***
## Residual                246   58.522 0.98185
```

```
## Total                248   59.604 1.00000
## ---
## Signif. codes:  0 '***' 0.001 '**' 0.01 '*' 0.05 '.' 0.1 ' ' 1
```

#### # Genus level

```
adTPPD_noconf_Gen <- adonis2(pddisGen ~ sample_data(newPDgen_R)[["Timepoint"]] +
                             sample_data(newPDgen_R)[["Parkinson"]], perm = 9999, by = "margin")
adTPPD_noconf_Gen
```

```
## Permutation test for adonis under reduced model
## Marginal effects of terms
## Permutation: free
## Number of permutations: 9999
##
## adonis2(formula = pddisGen ~ sample_data(newPDgen_R)[["Timepoint"]] +
##         sample_data(newPDgen_R)[["Parkinson"]], permutations = 9999, by = "margin")
##
##              Df SumOfSqs      R2      F Pr(>F)
## sample_data(newPDgen_R)[["Timepoint"]]  1  0.0754 0.00330 0.8375 0.5441
## sample_data(newPDgen_R)[["Parkinson"]]  1  0.5955 0.02611 6.6174 0.0001
## Residual                                246 22.1360 0.97057
## Total                                    248 22.8072 1.00000
##
## sample_data(newPDgen_R)[["Timepoint"]]
## sample_data(newPDgen_R)[["Parkinson"]] ***
## Residual
## Total
## ---
## Signif. codes:  0 '***' 0.001 '**' 0.01 '*' 0.05 '.' 0.1 ' ' 1
```

#### # Family level

```
adTPPD_noconf_Fam <- adonis2(pddisFam ~ sample_data(newPDFfam_R)[["Timepoint"]] +
                              sample_data(newPDFfam_R)[["Parkinson"]], perm = 9999, by = "margin")
adTPPD_noconf_Fam
```

```
## Permutation test for adonis under reduced model
## Marginal effects of terms
## Permutation: free
## Number of permutations: 9999
##
## adonis2(formula = pddisFam ~ sample_data(newPDFfam_R)[["Timepoint"]] +
##         sample_data(newPDFfam_R)[["Parkinson"]], permutations = 9999, by = "margin")
##
##              Df SumOfSqs      R2      F Pr(>F)
## sample_data(newPDFfam_R)[["Timepoint"]]  1  0.0433 0.00281 0.7156 0.6472
## sample_data(newPDFfam_R)[["Parkinson"]]  1  0.4691 0.03049 7.7593 0.0001
## Residual                                246 14.8731 0.96667
## Total                                    248 15.3859 1.00000
##
## sample_data(newPDFfam_R)[["Timepoint"]]
## sample_data(newPDFfam_R)[["Parkinson"]] ***
## Residual
## Total
## ---
## Signif. codes:  0 '***' 0.001 '**' 0.01 '*' 0.05 '.' 0.1 ' ' 1
```

Check for subsets (PD only / C only) to see if the timepoints differ:

#### # PD patients only:

```
pddisPD <- vegdist(t(as.data.frame(as.matrix(otu_table(subset_samples(newPDgen_R,
    sample_data(newPDgen_R)$Parkinson == "Parkinson"))))))
adonisTP_P <- adonis2(pddisPD ~ Timepoint, subset(pdmetaAD, Parkinson == "Parkinson"), perm = 9999,
    by = "margin")
adonisTP_P
```

```
## Permutation test for adonis under NA model
## Marginal effects of terms
## Permutation: free
## Number of permutations: 9999
##
## adonis2(formula = pddisPD ~ Timepoint, data = subset(pdmetaAD, Parkinson == "Parkinson"),
  permutations = 9999, by = "margin")
##           Df SumOfSqs      R2      F Pr(>F)
## Timepoint   1   0.0518 0.00489 0.5993 0.8094
## Residual  122  10.5498 0.99511
## Total      123  10.6016 1.00000
```

```
# Controls only:
pddisC <- vegdist(t(as.data.frame(as.matrix(otu_table(subset_samples(newPDgen_R,
  sample_data(newPDgen_R)$Parkinson == "control"))))))
adonisTP_C <- adonis2(pddisC ~ Timepoint, subset(pdmetaAD, Parkinson == "control"), perm = 9999, by
  = "margin")
adonisTP_C
```

```
## Permutation test for adonis under NA model
## Marginal effects of terms
## Permutation: free
## Number of permutations: 9999
##
## adonis2(formula = pddisC ~ Timepoint, data = subset(pdmetaAD, Parkinson == "control"),
  permutations = 9999, by = "margin")
##           Df SumOfSqs      R2      F Pr(>F)
## Timepoint   1   0.0595 0.00513 0.6339 0.7525
## Residual  123  11.5503 0.99487
## Total      124  11.6098 1.00000
```

There is no difference between timepoints, looking at either the control subjects or the PD patients.

Next, run an adonis loop with all potential confounding variables one by one (while correcting for timepoint and PD status):

```
# Initialize data frame for collecting results:
pdADONIS <- data.frame(row.names = adVarsPDvsC)

set.seed(27543298)

# Function for grabbing the p-value from comparisons
adloop <- function(dist, meta, varlist){
  adres <- sapply(varlist, function (x) adonis2(dist ~ ., meta[, c("Timepoint", "Parkinson", x)],
    by = "margin", permutations = 999)["Pr(>F)"][3,])
  return(adres)
}

# Run comparisons
pdADONIS$p_OTU <- adloop(pddisOTU, pdmetaAD, adVarsPDvsC)
pdADONIS$p_Gen <- adloop(pddisGen, pdmetaAD, adVarsPDvsC)
pdADONIS$p_Fam <- adloop(pddisFam, pdmetaAD, adVarsPDvsC)

# Order by the number of significant results
pdADONIS$n_sigs <- rowSums(pdADONIS[, 1:3] < 0.05)
```

Export these results:

**Table 6B**

```
kable_styling(kable(pdADONIS[order(pdADONIS$n_sigs, decreasing = TRUE),]))
```



|                                           | p_OTU | p_Gen | p_Fam | n_sigs |
|-------------------------------------------|-------|-------|-------|--------|
| BMI                                       | 0.001 | 0.002 | 0.003 | 3      |
| meds_ACEI_ARB                             | 0.032 | 0.046 | 0.018 | 3      |
| Rome_III_constip_-<br>defec_sumscore_9.15 | 0.001 | 0.001 | 0.001 | 3      |
| Wexner_total                              | 0.001 | 0.002 | 0.004 | 3      |
| meds_ca_antagonist                        | 0.017 | 0.031 | 0.183 | 2      |
| RLS                                       | 0.034 | 0.085 | 0.043 | 2      |
| FoodPC1                                   | 0.003 | 0.009 | 0.064 | 2      |
| history_TIA_-<br>ischemic_stroke          | 0.007 | 0.103 | 0.186 | 1      |
| age_at_stool_collection                   | 0.153 | 0.170 | 0.266 | 0      |
| gender                                    | 0.053 | 0.106 | 0.065 | 0      |
| meds_anticholinergic                      | 0.287 | 0.828 | 0.882 | 0      |
| meds_statin                               | 0.068 | 0.370 | 0.453 | 0      |
| meds_Warfarin                             | 0.564 | 0.610 | 0.339 | 0      |
| MMSE_total                                | 0.730 | 0.561 | 0.310 | 0      |
| Rome_III_IBS_-<br>criteria_fulfilled      | 0.229 | 0.191 | 0.276 | 0      |

```
## Export
write.csv(pdADONIS, "Outputs/table_6b.csv")
```

The variables that were significant in these single-confounder models for at least one level were kept for further comparisons.

```
# Make a new set out of the significant variables from the above table
adVarsSelect <- row.names(pdADONIS[pdADONIS[, "n_sigs"] > 0, ])
adVarsSelect <- c("Timepoint", "Parkinson", adVarsSelect)

# Since the Rome and Wexner scores are highly collinear, only one of them will be
# included in further comparisons; we chose the Rome III score, which is better validated.

adVarsSelect <- adVarsSelect[!grep("Wexner", adVarsSelect)]

# Adonis with all the variables on this list for each of the three levels
adAllSigsOTU <- adonis2(pddisOTU ~ ., data = pdmetaAD[, adVarsSelect], perm = 9999, by = "margin")
adAllSigsGen <- adonis2(pddisGen ~ ., data = pdmetaAD[, adVarsSelect], perm = 9999, by = "margin")
adAllSigsFam <- adonis2(pddisFam ~ ., data = pdmetaAD[, adVarsSelect], perm = 9999, by = "margin")

pdADONIS2 <- data.frame(row.names = adVarsSelect)

pdADONIS2[adVarsSelect, "p_OTU_full"] <- adAllSigsOTU[adVarsSelect, 5]
pdADONIS2[adVarsSelect, "p_Gen_full"] <- adAllSigsGen[adVarsSelect, 5]
pdADONIS2[adVarsSelect, "p_Fam_full"] <- adAllSigsFam[adVarsSelect, 5]

pdADONIS2$n_sigs <- rowSums(pdADONIS2 < 0.05)
```

## Envfit

Alternative test for beta diversity associations: envfit.

```
# Select the variables that were significant in the above ADONIS models:
pdcADsigs <- rownames(pdADONIS2)[which(pdADONIS2$n_sigs > 0)]

# Calculate NMDS ordinations
pdmdsOTU <- metaMDS(t(as.data.frame(as.matrix(otu_table(newPD_R)))), try = 500)
pdmdsGen <- metaMDS(t(as.data.frame(as.matrix(otu_table(newPDgen_R)))), try = 500)
pdmdsFam <- metaMDS(t(as.data.frame(as.matrix(otu_table(newPDFam_R)))), try = 500)

# Run envfit:

# OTU level data
efOTU <- envfit(pdmdsOTU, pdmetaAD[, c("Timepoint", pdcADsigs)], permutations = 9999, na.rm = TRUE)
```

```
# Genus level data
efGen <- envfit(pmdmsGen, pdmetaAD[, c("Timepoint", pdcADsigs)], permutations = 9999, na.rm = TRUE)

# Family level data
efFam <- envfit(pmdmsFam, pdmetaAD[, c("Timepoint", pdcADsigs)], permutations = 9999, na.rm = TRUE)
```

## Combined results

Collect the results of the above adonis and envfit comparisons and export:

Table 6AC

```
# Make empty dataframe
pdcBdivs <- as.data.frame(matrix(ncol = 3 + length(adVarsSelect), nrow = 9))
colnames(pdcBdivs) <- c("Model", "Test", "Level", adVarsSelect)
pdcBdivs$Model <- c(rep("TP+PD", 3), rep("TP+PD+confounders", 6))
pdcBdivs$Test <- c(rep("adonis", 6), rep("envfit", 3))
pdcBdivs$Level <- rep(c("OTU", "Genus", "Family"), 3)

# ADONIS results without confounders
pdcBdivs[1, 4:5] <- adTPPD_noconf_OTUs[1:2, 5]
pdcBdivs[2, 4:5] <- adTPPD_noconf_Gen[1:2, 5]
pdcBdivs[3, 4:5] <- adTPPD_noconf_Fam[1:2, 5]

pdcBdivsVars <- rownames(adAllSigsOTU)[-grep("Residual", rownames(adAllSigsOTU))]

# ADONIS results with confounders
pdcBdivs[4, adVarsSelect] <- adAllSigsOTU[adVarsSelect, 5]
pdcBdivs[5, adVarsSelect] <- adAllSigsGen[adVarsSelect, 5]
pdcBdivs[6, adVarsSelect] <- adAllSigsFam[adVarsSelect, 5]

# Envfit results with confounders

# Factors
pdcBdivs[7, names(efOTU$factors$pval)] <- efOTU$factors$pval
pdcBdivs[8, names(efGen$factors$pval)] <- efGen$factors$pval
pdcBdivs[9, names(efFam$factors$pval)] <- efFam$factors$pval

# Numeric variables
pdcBdivs[7, rownames(efOTU$vectors$arrows)] <- efOTU$vectors$pvals
pdcBdivs[8, rownames(efGen$vectors$arrows)] <- efGen$vectors$pvals
pdcBdivs[9, rownames(efFam$vectors$arrows)] <- efFam$vectors$pvals

# Reorder
pdcBdivs <- pdcBdivs[, order(colSums(!is.na(pdcBdivs)), decreasing = TRUE)]
```

Table shown split into two parts to fit the page:

```
kable(pdcBdivs[, 1:8], digits = 4)
```

| Model             | Test   | Level  | Timepoint | Parkinson | BMI    | history_TIA_ischemic_stroke | meds_ACEI_ARB |
|-------------------|--------|--------|-----------|-----------|--------|-----------------------------|---------------|
| TP+PD             | adonis | OTU    | 0.8984    | 0.0001    | NA     | NA                          | NA            |
| TP+PD             | adonis | Genus  | 0.5441    | 0.0001    | NA     | NA                          | NA            |
| TP+PD             | adonis | Family | 0.6472    | 0.0001    | NA     | NA                          | NA            |
| TP+PD+confounders | adonis | OTU    | 0.8879    | 0.0062    | 0.0015 | 0.0089                      | 0.0199        |
| TP+PD+confounders | adonis | Genus  | 0.5103    | 0.0157    | 0.0017 | 0.0846                      | 0.1678        |
| TP+PD+confounders | adonis | Family | 0.6253    | 0.0170    | 0.0246 | 0.3485                      | 0.0441        |
| TP+PD+confounders | envfit | OTU    | 0.9948    | 0.0006    | 0.0104 | 0.9476                      | 0.1882        |
| TP+PD+confounders | envfit | Genus  | 0.0828    | 0.0007    | 0.3718 | 0.6603                      | 0.0974        |
| TP+PD+confounders | envfit | Family | 0.1287    | 0.0009    | 0.6067 | 0.9814                      | 0.9532        |

```
kable(pdcBdivs[, c(1:3, 9:12)], digits = 3)
```

| Model             | Test   | Level  | meds_ca_antagonist | Rome_III_constip_defec_sumscore_9.15 | FoodPC1 | RLS   |
|-------------------|--------|--------|--------------------|--------------------------------------|---------|-------|
| TP+PD             | adonis | OTU    | NA                 | NA                                   | NA      | NA    |
| TP+PD             | adonis | Genus  | NA                 | NA                                   | NA      | NA    |
| TP+PD             | adonis | Family | NA                 | NA                                   | NA      | NA    |
| TP+PD+confounders | adonis | OTU    | 0.003              | 0.000                                | 0.013   | 0.086 |
| TP+PD+confounders | adonis | Genus  | 0.006              | 0.000                                | 0.096   | 0.110 |
| TP+PD+confounders | adonis | Family | 0.121              | 0.001                                | 0.226   | 0.133 |
| TP+PD+confounders | envfit | OTU    | 0.073              | 0.000                                | 0.063   | NA    |
| TP+PD+confounders | envfit | Genus  | 0.162              | 0.000                                | 0.560   | NA    |
| TP+PD+confounders | envfit | Family | 0.044              | 0.000                                | 0.303   | NA    |

```
## Export
write.csv(pdcBdivs, "Outputs/table_6ac.csv")
```

## Ordination plots of beta diversity

A plot showing the centroids for genera of interest:

Figure 7

```
# Make data frame out of NMDS sample data
pdmdsGendf <- data.frame(NMDS1 = pdmdsGen$points[,1], NMDS2 = pdmdsGen$points[,2], pdmetaAD)

# Collect taxon data from the NMDS into a data frame
nmdsSpecAll <- data.frame(NMDS1 = pdmdsGen$species[, 1], NMDS2 = pdmdsGen$species[, 2])

# Select genera of interest (hand-picked based on previous literature)
litSigs <- read.csv("Inputs/sigtaxa_from_literature.csv", sep = "\t")
nmdsSpecLit <- gsub(" ", "_", subset(litSigs, Level == "genus")$Taxon.mentioned)

# Are all these genera available in our data?
nmdsSpecLit[!(nmdsSpecLit %in% rownames(nmdsSpecAll))]

## [1] "Oscillospira"      "Catabacter"       "Clostridium_XIVb"

# A few are not, although the Clostridium taxon is missing because of a typo in the taxonomy;
# fix for this:
rownames(nmdsSpecAll) <- gsub("XIVb", "XIVb", rownames(nmdsSpecAll))

# Select these taxa from the data
nmdsSpec <- nmdsSpecAll[rownames(nmdsSpecAll) %in% nmdsSpecLit,]
nmdsSpec$Genus <- rownames(nmdsSpec)

# Draw plot
pdMDSplotSpec <- ggplot(pdmdsGendf) +
  geom_point(mapping = aes(x = NMDS1, y = NMDS2, col = Parkinson, shape = Parkinson), alpha = 0.4) +
  coord_fixed() +
  theme_bw() +
  facet_grid(~Timepoint, labeller = labeller(Timepoint = c(baseline = "Baseline", followup =
    "Follow-up")))) +
  scale_color_manual(values = c("gray65", "gray20"), name = "Type") +
  scale_shape_manual(name = "Type", values = c(2, 19)) +
  scale_linetype_manual(values = c("dashed", "solid"), name = "Type") +
  stat_ellipse(aes(x = NMDS1, y = NMDS2, colour = Parkinson, lty = Parkinson), level = 0.95, lwd =
    1, alpha = 0.6) +
  geom_text(data = nmdsSpec, aes(x = NMDS1, y = NMDS2, label = Genus), size = 2.75, fontface =
    "italic") +
  theme(legend.position = "bottom", panel.grid.minor = element_blank(), panel.grid.major =
    element_blank())
pdMDSplotSpec
```

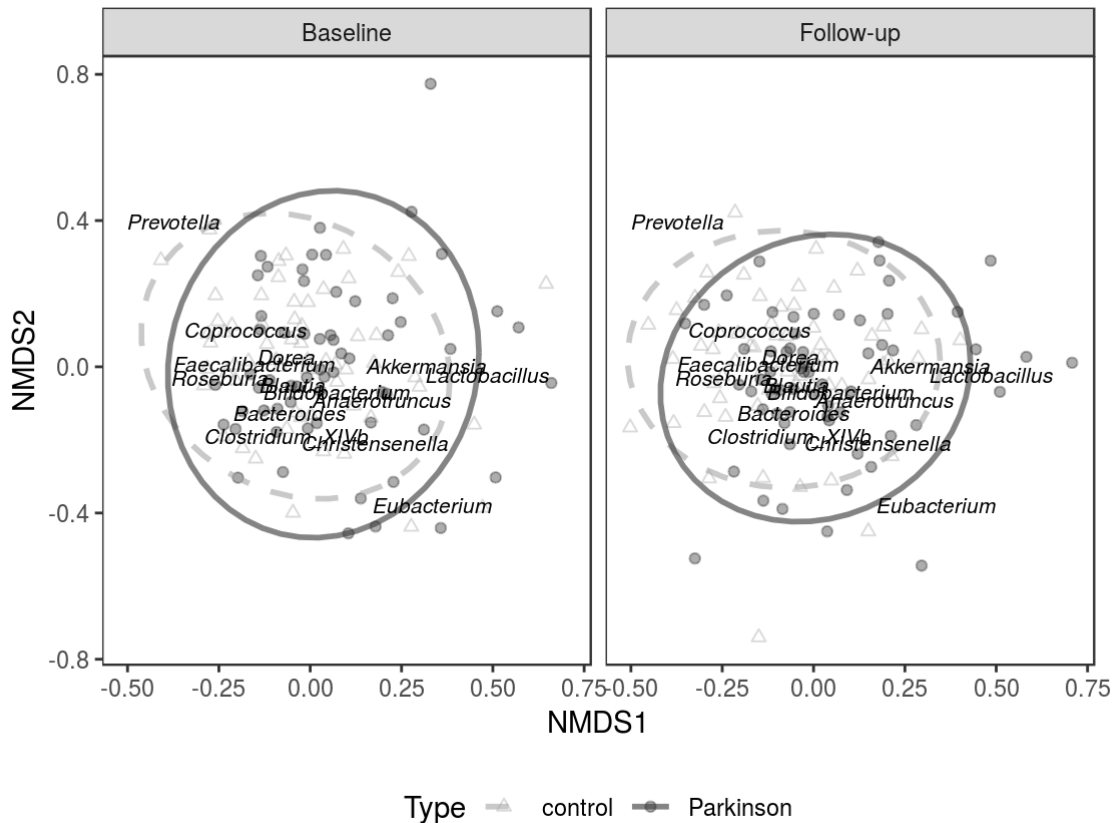

```
## Export to pdf
```

```
ggsave(pdMDSplotSpec, filename = "Outputs/figure7.pdf", device = cairo_pdf,
       width = fullpage, height = 4.75, units = "in")
```

Plots for the main confounding variables:

Figure 8

```
# Pick information for the numeric variables' vectors from envfit:
```

```
efVec <- as.data.frame(scores(efGen, display = "vectors"))
efVec <- cbind(efVec, Variable = rownames(efVec))
```

```
# Hand-adjusted positions for variable labels:
```

```
efVec$TextX <- efVec$NMDS1
efVec$TextY <- efVec$NMDS2-0.055
efVec$Labels <- as.character(efVec$Variable)
efVec$Labels[efVec$Labels == "Rome_III_constip_defec_sumscore_9.15"] <- "Rome III\nscore"
efVec["FoodPC1", "TextY"] <- 0.05
efVec["FoodPC1", "TextX"] <- (-0.155)
efVec["Rome_III_constip_defec_sumscore_9.15", "TextY"] <- (-0.3)
```

```
# Plot for numeric confounders
```

```
pdMDSplotEVec <- ggplot(pdmdsGendf) +
  geom_point(mapping = aes(x = NMDS1, y = NMDS2,
                          shape = Parkinson),
            size = 1.5, alpha = 0.1) +
  coord_fixed() +
  ggtitle("A.") +
  theme_bw(base_size = 8) +
  scale_shape_manual(values = c(2, 19), name = "Type") +
  geom_segment(data = efVec,
             aes(x = 0, xend = NMDS1, y = 0, yend = NMDS2), lwd = 0.5,
             arrow = arrow(length = unit(0.15, "cm")), colour = "black") +
  geom_text(data = efVec, aes(x = TextX, y = TextY, label = Labels),
          size = 2.5) +
```

```

theme(legend.position = "bottom",
      panel.grid.minor = element_blank(),
      panel.grid.major = element_blank(),
      legend.box.margin = ggplot2::margin(c(-10,0,-10,0)))

# Plot for calcium channel blocker medication
pdMDSplotECA <- ggplot(pdmdsGendf) +
  geom_point(mapping = aes(x = NMDS1, y = NMDS2,
                          col = meds_ca_antagonist, shape = meds_ca_antagonist),
            size = 1.5) +
  coord_fixed() +
  ggtitle("B.") +
  theme_bw(base_size = 8) +
  scale_color_manual(values = c("gray40", "limegreen"),
                    name = "Ca Channel Blockers",
                    labels = c("no", "yes")) +
  scale_shape_manual(values = c(1,18),
                    name = "Ca Channel Blockers",
                    labels = c("no", "yes")) +
  scale_linetype_manual(values = c(2,1),
                       name = "Ca Channel Blockers",
                       labels = c("no", "yes")) +
  stat_ellipse(aes(x = NMDS1, y = NMDS2,
                  lty = meds_ca_antagonist, color = meds_ca_antagonist),
             level = 0.95, lwd = 1) +
  theme(legend.position = "bottom",
        panel.grid.minor = element_blank(),
        panel.grid.major = element_blank(),
        legend.box.margin = ggplot2::margin(c(-10, 0, -10, 0)))

# Plot for ACE-I/ARB medication
pdMDSplotEACE <- ggplot(pdmdsGendf) +
  geom_point(mapping = aes(x = NMDS1, y = NMDS2,
                          col = meds_ACEI_ARB, shape = meds_ACEI_ARB),
            size = 1.5) +
  coord_fixed() +
  ggtitle("C.") +
  theme_bw(base_size = 8) +
  scale_color_manual(values = c("gray40", "mediumvioletred"),
                    name = "ACE-I/ARB",
                    labels = c("no", "yes")) +
  scale_shape_manual(values = c(1,15),
                    name = "ACE-I/ARB",
                    labels = c("no", "yes")) +
  scale_linetype_manual(values = c(2,1),
                       name = "ACE-I/ARB",
                       labels = c("no", "yes")) +
  stat_ellipse(aes(x = NMDS1, y = NMDS2,
                  lty = meds_ACEI_ARB, color = meds_ACEI_ARB),
             level = 0.95, lwd = 1) +
  theme(legend.position = "bottom",
        panel.grid.minor = element_blank(),
        panel.grid.major = element_blank(),
        legend.box.margin = ggplot2::margin(c(-10, 0, -10, 0)))

# Plot all three together:
fig8 <- arrangeGrob(
  pdMDSplotEVec + facet_grid(~Timepoint),
  pdMDSplotECA + facet_grid(~Timepoint),
  pdMDSplotEACE + facet_grid(~Timepoint),
  ncol = 1)

```

grid.arrange(fig8)

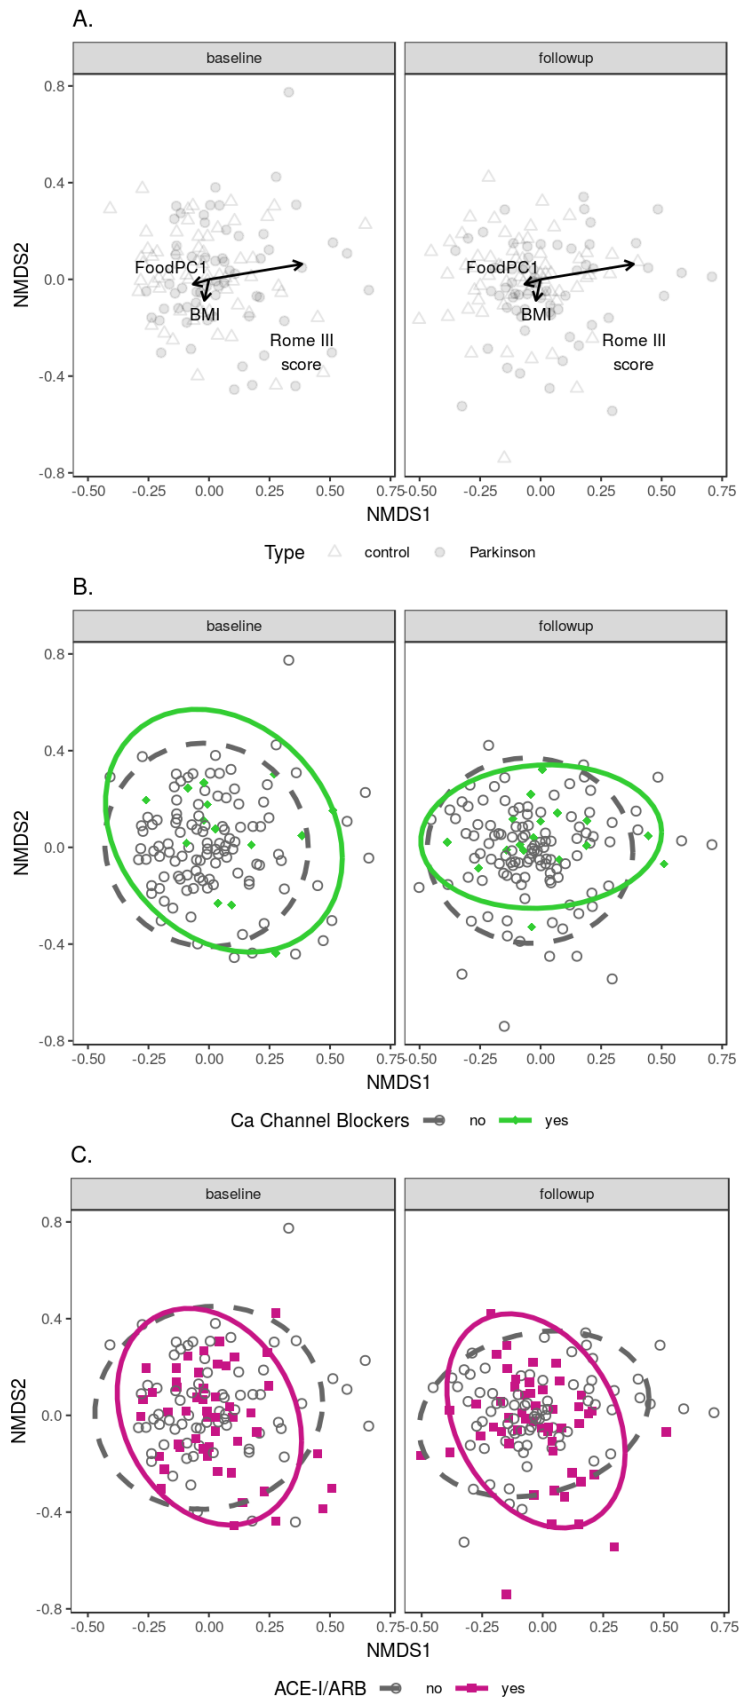

```
## Export to pdf
ggsave(fig8, filename = "Outputs/figure8.pdf", device = cairo_pdf,
        height = maxhi*0.9, width = halpage, units = "in")
```

Diet

```

## Only controls

# Make a subsetted, subsampled phyloseq object and calculate distance matrix
ffqPhyC <- subset_samples(ffqPhy, Parkinson == "control")
ffqPhyCR <- rarefy_even_depth(ffqPhyC, rngseed = 859410)
ffqDistC <- vegdist(t(as.data.frame(as.matrix(otu_table(ffqPhyCR))))))

ffqAdC <- sapply(ffqVars, function(x) adonis(ffqDistC ~ sample_data(ffqPhyCR)[[x]], perm =
  999)$aov.tab[1, "Pr(>F)"])

# Full data, correcting for PD status, OTU level

# Make a subsampled phyloseq object and calculate distance matrix
ffqPhyR <- rarefy_even_depth(ffqPhy, rngseed = 111213)
ffqOTUDist <- vegdist(t(as.data.frame(as.matrix(otu_table(ffqPhyR))))))

ffqAd <- sapply(ffqVars, function(x) adonis2(ffqOTUDist ~ ., as(sample_data(ffqPhyR)[,
  c("Parkinson", x)], "data.frame"), perm = 999, by = "margin")[2, "Pr(>F)"])

```

Collect the results into a table:

**Table S3**

```

ffqAdFull <- as.data.frame(cbind(ffqAdC, ffqAd))
colnames(ffqAdFull) <- c("OnlyC", "PD_C_OTU")
ffqAdFull <- ffqAdFull[order(rowSums(ffqAdFull < 0.05), decreasing = TRUE),]

kable(subset(ffqAdFull, OnlyC < 0.05 | PD_C_OTU < 0.05))

```

|                  | OnlyC | PD_C_OTU |
|------------------|-------|----------|
| Niasiini_per1kkc | 0.017 | 0.012    |
| FoodPC1          | 0.038 | 0.026    |
| Prot_E           | 0.036 | 0.145    |
| Lino_E           | 0.645 | 0.039    |
| Sterol_per1kkc   | 0.098 | 0.001    |
| Lakto_g_per1kkc  | 0.161 | 0.047    |
| E_vitam_per1kkc  | 0.291 | 0.042    |
| Leipayht_per1kkc | 0.026 | 0.141    |
| Puuro_per1kkc    | 0.410 | 0.047    |
| Voiriini_per1kkc | 0.049 | 0.085    |
| Vihantuo_per1kkc | 0.038 | 0.134    |
| Hedmeyh_per1kkc  | 0.004 | 0.273    |
| Karkit_per1kkc   | 0.501 | 0.047    |
| Virvsok_per1kkc  | 0.015 | 0.095    |

```

## Export
write.table(ffqAdFull, "Outputs/table_s3.csv")

```

Plot for niacin intake (“Niasiini\_per1kkc”) which was the only variable in addition to FoodPC1 that was significant in both comparisons:

```

ffq_phy_ord <- ordinate(ffqPhyR, "NMDS", "bray", try = 400)

plot_ordination(ffqPhyR, ffq_phy_ord, color = "Niasiini_per1kkc") +
  theme_bw() +
  coord_fixed() +
  stat_ellipse(level = 0.95, lwd = 1) +
  scale_color_manual(values = gray.colors(n = 5, start = 0.85, end = 0.2)) +
  theme(panel.grid = element_blank())

```

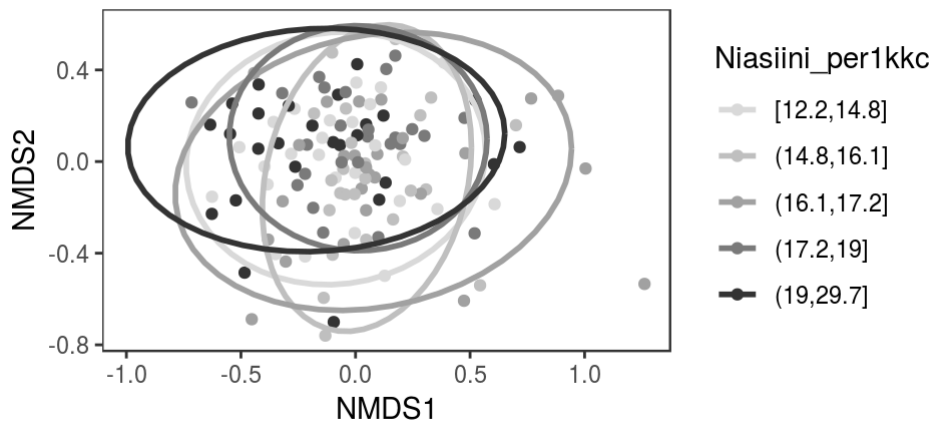

Not the clearest picture (what with five categories in the plot), but there could potentially be something here.

## Progression

### Data setup

Set up PD-only data for progression beta diversity analyses

```
# Variables of interest:
# combine the ones that differed between progression groups in the initial metadata comparisons
# and those that were correlated with PD status:
adVarsPD <- union(adVarsPD, prog_sigvars)
```

```
# Drop some variables, including the ones used in progression categorization
adVarsPD <- adVarsPD[-c(grep("LED", adVarsPD), grep("UPDRS", adVarsPD))]
adVarsPD
```

```
## [1] "GDS_15" "meds_dopa"
## [3] "meds_dopamine_agonist" "meds_MAO_inhibitor"
## [5] "NMSQuest_total" "NMSS_total"
## [7] "RBDSQ" "SCS_PD_total"
## [9] "SDQ_total" "sniffinsticks"
## [11] "meds_COMT_inhibitor" "meds_ASA"
## [13] "meds_statin" "ropinirole_mg"
## [15] "pigd_score_jankovic_ON" "levodopa_entacapone_mg"
## [17] "entacapone_mg" "pramipexole_mg"
```

```
# Subset data and drop three subjects who have missing values for Sniffinsticks
sort(colSums(is.na(sample_data(progPhy)[, adVarsPD])), decreasing = TRUE)
```

```
##      sniffinsticks      GDS_15      meds_dopa
##      3              0              0
## meds_dopamine_agonist  meds_MAO_inhibitor  NMSQuest_total
##      0              0              0
##      NMSS_total      RBDSQ      SCS_PD_total
##      0              0              0
##      SDQ_total  meds_COMT_inhibitor  meds_ASA
##      0              0              0
##      meds_statin  ropinirole_mg  pigd_score_jankovic_ON
##      0              0              0
## levodopa_entacapone_mg  entacapone_mg  pramipexole_mg
##      0              0              0
```

```
# Metadata
progmetaAD <- subset(progmeta, !is.na(progmeta$sniffinsticks))
```



```

# OTU level
progPhy_R <- rarefy_even_depth(subset_samples(progPhy, !is.na(sample_data(progPhy)$sniffinsticks)),
  rngseed = 232157)

# Genus level
progPhyGen_R <- rarefy_even_depth(subset_samples(progPhyGen,
  !is.na(sample_data(progPhyGen)$sniffinsticks)), rngseed = 861259)

# Family level
progPhyFam_R <- rarefy_even_depth(subset_samples(progPhyFam,
  !is.na(sample_data(progPhyFam)$sniffinsticks)), rngseed = 948329)

# Calculate distance matrices
progdisOTU <- vegdist(t(as.data.frame(as.matrix(otu_table(progPhy_R))))))
progdisGen <- vegdist(t(as.data.frame(as.matrix(otu_table(progPhyGen_R))))))
progdisFam <- vegdist(t(as.data.frame(as.matrix(otu_table(progPhyFam_R))))))

```

## ADONIS

Adonis for progression without confounders, timepoint in model:

```

adCatOTUs <- adonis2(progdisOTU ~ ., progmetaAD[, c("Timepoint", "ProgCat")], perm = 9999, by =
  "margin")
adCatGen <- adonis2(progdisGen ~ ., progmetaAD[, c("Timepoint", "ProgCat")], perm = 9999, by =
  "margin")
adCatFam <- adonis2(progdisFam ~ ., progmetaAD[, c("Timepoint", "ProgCat")], perm = 9999, by =
  "margin")

```

Comparisons of potential confounders in single-variable models:

```

pdADONISprog <- data.frame(row.names = adVarsPD)

# Function for grabbing the p-value from comparisons
adloopProg <- function(dist, meta, varlist){
  adres <- sapply(varlist, function (x) adonis2(dist ~ ., meta[, c("Timepoint", "ProgCat", x)], by
    = "margin")["Pr(>F)"] [3,])
  return(adres)
}

set.seed(13524508)

pdADONISprog$p_OTU <- adloopProg(progdisOTU, progmetaAD, adVarsPD)
pdADONISprog$p_Gen <- adloopProg(progdisGen, progmetaAD, adVarsPD)
pdADONISprog$p_Fam <- adloopProg(progdisFam, progmetaAD, adVarsPD)

pdADONISprog[, "n_sigs"] <- rowSums(pdADONISprog[, 1:3] < 0.05)
pdADONISprog <- pdADONISprog[order(pdADONISprog$n_sigs, decreasing = TRUE),]

```

## Table 7B

Export the single-variable results:

```
kable(pdADONISprog)
```

|                            | p_OTU | p_Gen | p_Fam | n_sigs |
|----------------------------|-------|-------|-------|--------|
| SDQ_total                  | 0.012 | 0.007 | 0.010 | 3      |
| meds_COMT_inhibitor        | 0.001 | 0.001 | 0.001 | 3      |
| levodopa_entacapone_<br>mg | 0.001 | 0.001 | 0.001 | 3      |
| entacapone_mg              | 0.001 | 0.001 | 0.001 | 3      |
| NMSQuest_total             | 0.003 | 0.018 | 0.137 | 2      |
| SCS_PD_total               | 0.001 | 0.005 | 0.166 | 2      |
| meds_statin                | 0.010 | 0.038 | 0.065 | 2      |
| GDS_15                     | 0.016 | 0.395 | 0.308 | 1      |

|                             | p_OTU | p_Gen | p_Fam | n_sigs |
|-----------------------------|-------|-------|-------|--------|
| meds_dopa                   | 0.025 | 0.061 | 0.088 | 1      |
| NMSS_total                  | 0.018 | 0.070 | 0.306 | 1      |
| RBDSQ                       | 0.007 | 0.131 | 0.079 | 1      |
| ropinirole_mg               | 0.365 | 0.045 | 0.223 | 1      |
| meds_dopamine_-<br>agonist  | 0.050 | 0.365 | 0.074 | 0      |
| meds_MAO_inhibitor          | 0.545 | 0.826 | 0.442 | 0      |
| sniffinsticks               | 0.422 | 0.342 | 0.093 | 0      |
| meds_ASA                    | 0.430 | 0.824 | 0.943 | 0      |
| pigd_score_jankovic_-<br>ON | 0.057 | 0.176 | 0.484 | 0      |
| pramipexole_mg              | 0.075 | 0.060 | 0.059 | 0      |

```
## Export
write.csv(pdADONISprog, "Outputs/table_7b.csv")
```

COMT inhibitors are significant on all three levels as three differently measured variables (meds\_COMT\_inhibitor (yes/no), levodopa\_entacapone\_mg (numeric, combined medication variable), and entacapone\_mg (numeric variable for amount of this COMT inhibitor). SDQ score and statins are also significant on all levels.

Combined model with the significant confounders from the above comparisons:

```
# Trim set of confounders:
adVarsPDsel <- rownames(pdADONISprog[which(pdADONISprog$n_sigs > 0),])
adVarsPDsel <- adVarsPDsel[-grep("entacapone", adVarsPDsel)] # leave out the "mg" variables for COMT

## Run full models, with progression and confounders
adprog_cat_OTU <- adonis2(progdisOTU ~ ., progmetaAD[, c("Timepoint", "ProgCat", adVarsPDsel)], perm
  = 9999, by = "margin")
adprog_cat_Gen <- adonis2(progdisGen ~ ., progmetaAD[, c("Timepoint", "ProgCat", adVarsPDsel)], perm
  = 9999, by = "margin")
adprog_cat_Fam <- adonis2(progdisFam ~ ., progmetaAD[, c("Timepoint", "ProgCat", adVarsPDsel)], perm
  = 9999, by = "margin")
```

Collect the results of the two different adonis models:

```
# Make data frame
progBdivs <- as.data.frame(matrix(ncol = 5 + length(adVarsPDsel), nrow = 9))
colnames(progBdivs) <- c("Test", "Model", "Level", "Timepoint", "ProgCat", adVarsPDsel)
progBdivs$Test <- c(rep("adonis2", 6), rep("envfit", 3))
progBdivs$Model <- c(rep("TP+Prog", 3), rep("TP+Prog+confounders", 6))
progBdivs$Level <- rep(c("OTU", "Genus", "Family"), 3)

# Progression without confounders
progBdivs[1, 4:5] <- adCatOTUs[1:2, 5]
progBdivs[2, 4:5] <- adCatGen[1:2, 5]
progBdivs[3, 4:5] <- adCatFam[1:2, 5]

# Progression with confounders
progBdivs[4, 4:ncol(progBdivs)] <- adprog_cat_OTU[colnames(progBdivs)[4:ncol(progBdivs)], 5]
progBdivs[5, 4:ncol(progBdivs)] <- adprog_cat_Gen[colnames(progBdivs)[4:ncol(progBdivs)], 5]
progBdivs[6, 4:ncol(progBdivs)] <- adprog_cat_Fam[colnames(progBdivs)[4:ncol(progBdivs)], 5]
```

## Envfit

```
# Drop a few variables that were not significant in the adonis comparisons above
progEnvVars <- names(which(colSums(progBdivs[4:6, 5:ncol(progBdivs)] < 0.05) > 0))

# Use the select confounders as environmental variables in vegan metaMDS
efOTUprog <- envfit(metaMDS(t(as.data.frame(as.matrix(otu_table(progPhy_R))))), try = 500),
  progmetaAD[, c("Timepoint", "ProgCat", progEnvVars)], permu = 9999, na.rm = TRUE)

efGenprog <- envfit(metaMDS(t(as.data.frame(as.matrix(otu_table(progPhyGen_R))))), try = 500),
  progmetaAD[, c("Timepoint", "ProgCat", progEnvVars)], permu = 9999, na.rm = TRUE)
```

```
efFamprog <- envfit(metaMDS(t(as.data.frame(as.matrix(otu_table(progPhyFam_R))))), try = 500),
  progmetaAD[, c("Timepoint", "ProgCat", progEnvVars)], permu = 9999, na.rm = TRUE)
```

## Combined results

Collect the results of the adonis and envfit comparisons and export:

Table 7AC

```
## Add results from envfit to previous data frame
progefobjs <- list(efOTUprog, efGenprog, efFamprog)

# Vectors
progBdivs[7:9, gsub("pvals.", "", names(unlist(progefobjs[[1]][["vectors"]][["pvals"]])))] <-
  unlist(sapply(progefobjs, function(x) x[["vectors"]][["pvals"]]))

# Factors
progBdivs[7:9, gsub("pvals.", "", names(unlist(progefobjs[[1]][["factors"]][["pvals"]])))] <-
  unlist(sapply(progefobjs, function(x) x[["factors"]][["pvals"]]))
```

Table shown split into two parts to fit the page:

```
kable(progBdivs[, 1:9], digits = 4)
```

| Test    | Model               | Level  | Timepoint | ProgCat | SDQ_total | meds_COMT_inhibitor | NMSQuest_total | SCS_PD_total |
|---------|---------------------|--------|-----------|---------|-----------|---------------------|----------------|--------------|
| adonis2 | TP+Prog             | OTU    | 1.0000    | 0.2451  | NA        | NA                  | NA             | NA           |
| adonis2 | TP+Prog             | Genus  | 0.9448    | 0.3443  | NA        | NA                  | NA             | NA           |
| adonis2 | TP+Prog             | Family | 0.8504    | 0.1422  | NA        | NA                  | NA             | NA           |
| adonis2 | TP+Prog+confounders | OTU    | 0.8647    | 0.3956  | 0.1143    | 0.0005              | 0.0357         | 0.0018       |
| adonis2 | TP+Prog+confounders | Genus  | 0.5149    | 0.3344  | 0.1155    | 0.0011              | 0.0265         | 0.0353       |
| adonis2 | TP+Prog+confounders | Family | 0.5823    | 0.2040  | 0.0670    | 0.0005              | 0.3213         | 0.2705       |
| envfit  | TP+Prog+confounders | OTU    | 0.7974    | 0.3302  | NA        | 0.0001              | 0.2269         | 0.0312       |
| envfit  | TP+Prog+confounders | Genus  | 0.3717    | 0.5918  | NA        | 0.2945              | 0.0237         | 0.4271       |
| envfit  | TP+Prog+confounders | Family | 0.0738    | 0.8894  | NA        | 0.8875              | 0.1016         | 0.4790       |

```
kable(progBdivs[, c(1:3, 10:15)], digits = 4)
```

| Test    | Model               | Level  | meds_statin | GDS_15 | meds_dopa | NMSS_total | RBDSQ  | ropinirole_mg |
|---------|---------------------|--------|-------------|--------|-----------|------------|--------|---------------|
| adonis2 | TP+Prog             | OTU    | NA          | NA     | NA        | NA         | NA     | NA            |
| adonis2 | TP+Prog             | Genus  | NA          | NA     | NA        | NA         | NA     | NA            |
| adonis2 | TP+Prog             | Family | NA          | NA     | NA        | NA         | NA     | NA            |
| adonis2 | TP+Prog+confounders | OTU    | 0.0416      | 0.1269 | 0.4210    | 0.4467     | 0.0624 | 0.4110        |
| adonis2 | TP+Prog+confounders | Genus  | 0.2135      | 0.8041 | 0.3441    | 0.2155     | 0.5134 | 0.0976        |
| adonis2 | TP+Prog+confounders | Family | 0.4417      | 0.6596 | 0.2083    | 0.4982     | 0.3120 | 0.4395        |
| envfit  | TP+Prog+confounders | OTU    | 0.4745      | NA     | NA        | NA         | NA     | NA            |
| envfit  | TP+Prog+confounders | Genus  | 0.0003      | NA     | NA        | NA         | NA     | NA            |
| envfit  | TP+Prog+confounders | Family | 0.0054      | NA     | NA        | NA         | NA     | NA            |

```
# col.names = c("Test", "Model", "Level", "Timepoint", "ProgCat", "SDQ", "COMT", "NMSQuest",
  "SCS-PD", "statins", "GDS15", "L-dopa", "NMSS", "RBDSQ", "ropinirole (mg)")
```

```
## Export
write.csv(progBdivs, "Outputs/table_7ac.csv")
```

## PD phenotypes (TD vs PIGD)

Test without confounders using adonis, both with timepoint included in the model, or separately for each timepoint, starting with OTU level only.

```
# Subsample data
progPhyPheR <- rarefy_even_depth(progPhyPhe, rngseed = 987651)

# Calculate distance matrix
```

```
progPhyPheDist <- vegdist(t(as.data.frame(as.matrix(otu_table(progPhyPheR)))), method = "bray")
```

```
# Run model with all data, timepoint in model
```

```
adonis2(progPhyPheDist ~ sample_data(progPhyPheR)[["JankovicClass"]] +  
  sample_data(progPhyPheR)[["Timepoint"]], perm = 9999)
```

```
## Permutation test for adonis under reduced model
```

```
## Terms added sequentially (first to last)
```

```
## Permutation: free
```

```
## Number of permutations: 9999
```

```
##
```

```
## adonis2(formula = progPhyPheDist ~ sample_data(progPhyPheR)[["JankovicClass"]] +  
  sample_data(progPhyPheR)[["Timepoint"]], permutations = 9999)
```

```
##
```

```
## sample_data(progPhyPheR)[["JankovicClass"]] 1 0.2254 0.00888 0.9101
```

```
## sample_data(progPhyPheR)[["Timepoint"]] 1 0.1405 0.00553 0.5671
```

```
## Residual 101 25.0205 0.98559
```

```
## Total 103 25.3864 1.00000
```

```
## Pr(>F)
```

```
## sample_data(progPhyPheR)[["JankovicClass"]] 0.5989
```

```
## sample_data(progPhyPheR)[["Timepoint"]] 0.9913
```

```
## Residual
```

```
## Total
```

```
# Model with only baseline data
```

```
progPhyPheDistBL <- vegdist(t(as.data.frame(as.matrix(otu_table(subset_samples(progPhyPheR,  
  Timepoint == "baseline"))))), method = "bray")
```

```
pheMetaBL <- as(sample_data(subset_samples(progPhyPheR, Timepoint == "baseline")), "data.frame")
```

```
adonis(progPhyPheDistBL ~ pheMetaBL[["JankovicClass"]], perm = 9999)
```

```
##
```

```
## Call:
```

```
## adonis(formula = progPhyPheDistBL ~ pheMetaBL[["JankovicClass"]], permutations = 9999)
```

```
##
```

```
## Permutation: free
```

```
## Number of permutations: 9999
```

```
##
```

```
## Terms added sequentially (first to last)
```

```
##
```

```
##
```

```
## pheMetaBL[["JankovicClass"]] 1 0.2818 0.28179 1.1212 0.0233 0.2621
```

```
## Residuals 47 11.8121 0.25132 0.9767
```

```
## Total 48 12.0939 1.0000
```

```
# Model with only follow-up data
```

```
progPhyPheDistFU <- vegdist(t(as.data.frame(as.matrix(otu_table(subset_samples(progPhyPheR,  
  Timepoint == "followup"))))), method = "bray")
```

```
pheMetaFU <- as(sample_data(subset_samples(progPhyPheR, Timepoint=="followup")), "data.frame")
```

```
adonis(progPhyPheDistFU ~ pheMetaFU[["JankovicClass"]], perm = 9999)
```

```
##
```

```
## Call:
```

```
## adonis(formula = progPhyPheDistFU ~ pheMetaFU[["JankovicClass"]], permutations = 9999)
```

```
##
```

```
## Permutation: free
```

```
## Number of permutations: 9999
```

```
##
```

```
## Terms added sequentially (first to last)
```

```
##
```

```
##
```

```
## pheMetaFU[["JankovicClass"]] 1 0.1968 0.19677 0.80491 0.01496 0.7905
```

```
## Residuals 53 12.9564 0.24446 0.98504
```

```
## Total 54 13.1532 1.00000
```

The results offer no support for a difference in beta diversity between the two PD phenotypes on the OTU level, and since this is the level with the highest resolution, it seems unlikely that there would be differences in summarized data on different taxonomic levels, either.

## Differential abundance

### PD vs control

#### Data filtering

Trim to taxa that are present in around 1/10 samples and drop the “unclassified” bin (which is basically just a garbage bin of taxa that were unclassified at the selected taxonomic level).

```
round((nrow(pdclin) / 10))

## [1] 26

trim_co1 <- round((nrow(pdclin) / 10))

newPDtrim <- filter_taxa(newPD, function(x) sum(x > 1) > trim_co1 & sum(x) > 999, prune = TRUE)

newPDtrimGen <- filter_taxa(collapseTaxLevel(newPD, level = "Genus", fixUnclassifieds = FALSE),
  function(x) sum(x > 1) > trim_co1, prune = TRUE)
newPDtrimGen <- subset_taxa(newPDtrimGen, Genus != "unclassified")

newPDtrimFam <- filter_taxa(collapseTaxLevel(newPD, level = "Family", fixUnclassifieds = FALSE),
  function(x) sum(x > 1) > trim_co1, prune = TRUE)
newPDtrimFam <- subset_taxa(newPDtrimFam, Family != "unclassified")
```

Regarding confounder selection, based on the diversity comparisons, we decided to use BMI and the Rome III score, which were the most consistently significant in various different models and subsets of data.

### ANCOM

Comparisons with ANCOM were run separately for each timepoint and corrected for Rome III score and BMI. The version of the program used was an early version of ANCOM 2.

```
source("Inputs/ANCOM_updated_code.R")
library("exactRankTests")
library("nlme")
library("tidyr")

ancom2CvsPD <- function(phyloObj, adjp = 2){
  otu_data <- data.frame(Sample.ID = sample_data(phyloObj)$Subject,
    as.data.frame(as.matrix(t(otu_table(phyloObj))))))
  meta_data <- data.frame(Sample.ID = sample_data(phyloObj)$Subject,
    Parkinson = sample_data(phyloObj)$Parkinson,
    Rome = sample_data(phyloObj)$Rome_III_constip_defec_sumscore_9.15,
    BMI = sample_data(phyloObj)$BMI)
  res <- ANCOM.main(OTUdat = otu_data,
    Vardat = meta_data,
    adjusted = TRUE,
    repeated = FALSE,
    main.var = "Parkinson",
    adj.formula = "Rome + BMI",
    repeat.var = NULL,
    longitudinal = FALSE,
    random.formula = NULL,
    multcorr = adjp,
    sig = 0.05,
    prev.cut = 0.9)
```

```

return(res)
}

getAnRes <- function(resdf){
  hits <- as.character(resdf$W.taxa[resdf$W.taxa$detected_0.6 == TRUE, "otu.names"])
  return(hits)
}

## PD vs control

# OTUs
# NB: the OTU-level ANCOM comparisons take a while (but less than an hour)

# Baseline
ancomOTUsBL <- ancom2CvsPD(subset_samples(newPDtrim, Timepoint == "baseline"))
# Followup
ancomOTUsFU <- ancom2CvsPD(subset_samples(newPDtrim, Timepoint == "followup"))

# Genera

# Baseline
ancomGenBL <- ancom2CvsPD(subset_samples(newPDtrimGen, Timepoint == "baseline"))
# Followup
ancomGenFU <- ancom2CvsPD(subset_samples(newPDtrimGen, Timepoint == "followup"))

# Families

# Baseline
ancomFamBL <- ancom2CvsPD(subset_samples(newPDtrimFam, Timepoint == "baseline"))
# Followup
ancomFamFU <- ancom2CvsPD(subset_samples(newPDtrimFam, Timepoint == "followup"))

```

Save the results from ANCOM to a table:

**Table S4A**

```

# Collect results
ancomRes <- data.frame(Level = c(rep("OTU", 2), rep("Genus", 2), rep("Family",2)),
  Timepoint = rep(c("baseline", "followup"), 3))
ancomRes$List <- c(paste(getAnRes(ancomOTUsBL), collapse = ","),
  paste(getAnRes(ancomOTUsFU), collapse = ","),
  paste(getAnRes(ancomGenBL), collapse = ","),
  paste(getAnRes(ancomGenFU), collapse = ","),
  paste(getAnRes(ancomFamBL), collapse = ","),
  paste(getAnRes(ancomFamFU), collapse = ","))
ancomRes <- separate_rows(ancomRes, List, sep = ",")
colnames(ancomRes) <- c("Level", "Timepoint", "Taxon")

# Add genus classifications to OTU level results for exporting
ancomResExport <- ancomRes
ancomResExport$Taxon <- as.character(ancomResExport$Taxon)
ancomResExport[ancomResExport$Level == "OTU", "Taxon"] <- paste(ancomResExport[ancomResExport$Level
  == "OTU", "Taxon"], " (", gsub("_", " ", tax_table(newPD)[ancomResExport[ancomResExport$Level ==
  "OTU", "Taxon"],"Genus"]), ")")
ancomResExport <- ancomResExport[order(ancomResExport$Level, ancomResExport$Timepoint), ]
rownames(ancomResExport) <- NULL

```

```
kable_styling(kable(ancomResExport), font_size = 10, full_width = FALSE)
```

| Level  | Timepoint | Taxon              |
|--------|-----------|--------------------|
| Family | baseline  | Bifidobacteriaceae |
| Family | baseline  | Prevotellaceae     |
| Family | followup  | Bifidobacteriaceae |

| Level  | Timepoint | Taxon                                  |
|--------|-----------|----------------------------------------|
| Family | followup  | Prevotellaceae                         |
| Family | followup  | Puniceicoccaceae                       |
| Genus  | baseline  | Bifidobacterium                        |
| Genus  | followup  | Bifidobacterium                        |
| Genus  | followup  | Roseburia                              |
| Genus  | followup  | Prevotella                             |
| OTU    | baseline  | Otu0030 (Alistipes)                    |
| OTU    | baseline  | Otu0104 (Clostridium IV)               |
| OTU    | baseline  | Otu0007 (Bifidobacterium)              |
| OTU    | baseline  | Otu0377 (Ruminococcaceae unclassified) |
| OTU    | baseline  | Otu0059 (Ruminococcaceae unclassified) |
| OTU    | baseline  | Otu0217 (Intestinimonas)               |
| OTU    | followup  | Otu0104 (Clostridium IV)               |
| OTU    | followup  | Otu0109 (Ruminococcus)                 |
| OTU    | followup  | Otu0105 (Oscillibacter)                |
| OTU    | followup  | Otu0051 (Clostridium sensu stricto)    |
| OTU    | followup  | Otu0078 (Firmicutes unclassified)      |
| OTU    | followup  | Otu0131 (Bacteroides)                  |
| OTU    | followup  | Otu0007 (Bifidobacterium)              |
| OTU    | followup  | Otu0129 (Clostridium XIVa)             |

```
## Export:
write.csv(ancomResExport, "Outputs/table_s4a.csv")

# Rearrange for downstream comparisons
ancomRes <- ancomRes[, c("Taxon", "Level", "Timepoint")]
ancomRes$pval <- NA
```

## Random forests

```
library("randomForest")
library("rfUtilities")
library("plyr")
library("rfPermute")
library("e1071")

# Function for random forest classifier
rfCvsPD <- function(phyloObj, rngseed, treen){
  rf.data <- data.frame(t(otu_table(phyloObj)), Parkinson = sample_data(phyloObj)[["Parkinson"]])
  set.seed(rngseed)
  rfres <- rfPermute(Parkinson~., data = rf.data, ntree = treen, num.cores = 4)
  return(rfres)
}

# Function for getting taxon significances
getRFsigs <- function(rfres, lvl){
  rfsig <- as.data.frame(rp.importance(rfres)[, c("MeanDecreaseGini", "MeanDecreaseGini.pval")])
  rfsig$Level <- lvl
  rfsig$Taxon <- rownames(rfsig)
  return(rfsig)
}

# Function for getting model significance
getRFmodelSig <- function(rfres, phyloObj){
  modsig <- rf.significance(rfres, t(otu_table(phyloObj)), num.cores = 4)
  modsigout <- unlist(c(modsig[c("pValue", "test.OOB")], median(modsig$RandOOB)))
  return(modsigout)
}

# Run comparisons

# OTUs
rfOtusBL <- rfCvsPD(subset_samples(newPDtrim, Timepoint == "baseline"), 624443, 500)
rfSigOtusBL <- getRFsigs(rfOtusBL, "OTU")
```



```

rfOtuFU <- rfCvsPD(subset_samples(newPDtrim, Timepoint == "followup"), 244134, 500)
rfSigOtuFU <- getRFsigs(rfOtuFU, "OTU")

# Genera

rfGenBL <- rfCvsPD(subset_samples(newPDtrimGen, Timepoint == "baseline"), 927991, 500)
rfSigGenBL <- getRFsigs(rfGenBL, "Genus")

rfGenFU <- rfCvsPD(subset_samples(newPDtrimGen, Timepoint == "followup"), 199877, 500)
rfSigGenFU <- getRFsigs(rfGenFU, "Genus")

# Families

rfFamBL <- rfCvsPD(subset_samples(newPDtrimFam, Timepoint == "baseline"), 611582, 500)
rfSigFamBL <- getRFsigs(rfFamBL, "Family")

rfFamFU <- rfCvsPD(subset_samples(newPDtrimFam, Timepoint == "followup"), 882945, 500)
rfSigFamFU <- getRFsigs(rfFamFU, "Family")

```

**Table S4B**

Save the results of random forests to a table (here showing only 20 first taxa):

```

# Collect the results
rfRes <- rbind(
  data.frame(rbind(rfSigOtuBL, rfSigGenBL, rfSigFamBL), Timepoint = "baseline"),
  data.frame(rbind(rfSigOtuFU, rfSigGenFU, rfSigFamFU), Timepoint = "followup"))
rfRes$Timepoint <- factor(rfRes$Timepoint, levels = c("baseline", "followup"))
rfRes$Level <- factor(rfRes$Level)

# Trim to significant only and rearrange for final table
rfResSigs <- subset(rfRes, MeanDecreaseGini.pval < 0.05)
rfResSigs <- rfResSigs[,c("Level", "Timepoint", "Taxon", "MeanDecreaseGini",
  "MeanDecreaseGini.pval")]
rfResSigs <- rfResSigs[order(rfResSigs$Level, rfResSigs$Timepoint, rfResSigs$Taxon),]

# Add genus information to OTU level results
rfResSigs[rfResSigs$Level == "OTU", "Taxon"] <- paste(rfResSigs[rfResSigs$Level == "OTU", "Taxon"],
  " (", gsub("_", " ", tax_table(newPD)[rfResSigs[rfResSigs$Level == "OTU", "Taxon"], "Genus"]),
  ")", sep="")
rownames(rfResSigs) <- NULL

```

```
kable_styling(kable(head(rfResSigs, 20), digits = 4), font_size = 10, full_width = FALSE)
```

| Level  | Timepoint | Taxon              | MeanDecreaseGini | MeanDecreaseGini.pval |
|--------|-----------|--------------------|------------------|-----------------------|
| Family | baseline  | Lachnospiraceae    | 4.2204           | 0.0198                |
| Family | baseline  | Prevotellaceae     | 3.4039           | 0.0099                |
| Family | baseline  | Puniceicoccaceae   | 2.7669           | 0.0099                |
| Family | baseline  | Rikenellaceae      | 4.0141           | 0.0297                |
| Family | followup  | Bifidobacteriaceae | 3.8736           | 0.0396                |
| Family | followup  | Lactobacillaceae   | 2.7425           | 0.0396                |
| Family | followup  | Puniceicoccaceae   | 2.0532           | 0.0099                |
| Genus  | baseline  | Alistipes          | 2.2726           | 0.0099                |
| Genus  | baseline  | Blautia            | 1.5800           | 0.0396                |
| Genus  | baseline  | Fusicatenibacter   | 2.0744           | 0.0099                |
| Genus  | baseline  | Prevotella         | 1.6880           | 0.0495                |
| Genus  | baseline  | Roseburia          | 2.2940           | 0.0198                |
| Genus  | followup  | Bifidobacterium    | 2.0608           | 0.0396                |
| Genus  | followup  | Butyrivococcus     | 2.5655           | 0.0099                |
| Genus  | followup  | Clostridium_XIVa   | 2.4202           | 0.0198                |
| Genus  | followup  | Faecalicoccus      | 1.3253           | 0.0099                |
| Genus  | followup  | Granulicatella     | 0.5614           | 0.0495                |
| Genus  | followup  | Lachnospira        | 2.0733           | 0.0495                |
| Genus  | followup  | Lactobacillus      | 1.3817           | 0.0297                |
| Genus  | followup  | Prevotella         | 1.4953           | 0.0297                |

```

# Export
write.csv(rfResSigs, "Outputs/table_s4b.csv")

```



```
# Trim results for downstream comparisons
rfRes <- rfRes[, c("Taxon", "Level", "Timepoint", "MeanDecreaseGini.pval")]
colnames(rfRes) <- c("Taxon", "Level", "Timepoint", "pval")
rownames(rfRes) <- NULL
```

Test for the classifier significance:

```
# NB: this is quite slow.
rfModSigs <- rbind(
  getRFmodelSig(rfOtusBL, subset_samples(newPDtrim, Timepoint == "baseline")),
  getRFmodelSig(rfOtusFU, subset_samples(newPDtrim, Timepoint == "followup")),
  getRFmodelSig(rfGenBL, subset_samples(newPDtrimGen, Timepoint == "baseline")),
  getRFmodelSig(rfGenFU, subset_samples(newPDtrimGen, Timepoint == "followup")),
  getRFmodelSig(rfFamBL, subset_samples(newPDtrimFam, Timepoint == "baseline")),
  getRFmodelSig(rfFamFU, subset_samples(newPDtrimFam, Timepoint == "followup"))
)
```

Fill in the rest of the details to the table:

## Table S5

```
colnames(rfModSigs) <- c("pValue", "realOOB", "permOOB")
rfModSigs <- as.data.frame(rfModSigs)
rfModSigs$Level <- factor(rep(c("OTU", "Genus", "Family"), each = 2))
rfModSigs$Timepoint <- factor(rep(c("baseline", "followup"), 3), levels = c("baseline", "followup"))

rfModSigs <- rfModSigs[, c("Level", "Timepoint", "realOOB", "permOOB", "pValue")]

kable_styling(kable(rfModSigs, digits = 3), full_width = FALSE)
```

| Level  | Timepoint | realOOB | permOOB | pValue |
|--------|-----------|---------|---------|--------|
| OTU    | baseline  | 0.375   | 0.516   | 0.001  |
| OTU    | followup  | 0.352   | 0.516   | 0.000  |
| Genus  | baseline  | 0.430   | 0.508   | 0.045  |
| Genus  | followup  | 0.328   | 0.516   | 0.000  |
| Family | baseline  | 0.391   | 0.516   | 0.005  |
| Family | followup  | 0.430   | 0.516   | 0.046  |

```
## Export
write.csv(rfModSigs, "Outputs/table_s5.csv")
```

## DESeq2

To use all of the data from both timepoints and to include the subject identity information in the model, we decided to run DESeq2 with the following model: Rome\_III\_constip\_defec\_sumscore\_9.15 + BMI + Parkinson:DummySubject + Timepoint\*Parkinson. However, some subjects had missing values for BMI, and dropping them leads to an unbalanced design where there is one PD patient more than there are controls. To solve this issue (and also producing more robust results as a by-product), we decided to run the comparisons with a leave-one-out approach, dropping each PD patient in turn.

```
# Drop cases with missing BMI values:
missingBMIsamples <- names(which(table(sample_data(subset_samples(newPDtrim, !is.na(BMI)))$Subject)
  < 2))
newPDtrimNoNA <- subset_samples(newPDtrim, !(Subject %in% c(missingBMIsamples)))

# Number of samples remaining in each group:
table(sample_data(newPDtrimNoNA)$Parkinson, sample_data(newPDtrimNoNA)$Timepoint)
```

```
##
##      baseline followup
## control      61      61
## Parkinson    62      62
```

```

library("DESeq2")

# Function for running DESeq2 with the selected model + collecting results:
dsPDTP_Conf <- function(phylo0){

  ds0 <- phyloseq_to_deseq2(phylo0, ~ Rome_III_constip_defec_sumscore_9.15 +
                           BMI + Parkinson:DummySubject + Timepoint*Parkinson)

  ds0 <- DESeq(ds0, fitType = "parametric", sfType = "poscounts")

  resFinal <- as.data.frame(matrix(nrow = 0, ncol = 0))

  resDF <- function(contrast = NA, name = NA, outputname){
    if(!is.na(name)){
      resDF <- results(ds0, cooksCutoff = FALSE, name = name)
    } else if (!is.na(contrast)){
      resDF <- results(ds0, cooksCutoff = FALSE, contrast = contrast)
    }
    resDF <- data.frame(cbind(as(resDF, "data.frame"), as(tax_table(phylo0)[rownames(resDF),],
                          "matrix")), Contrast = outputname)
    return(resDF)
  }

  # PD vs C at baseline
  resFinal <- rbind(resFinal, resDF(name = "Parkinson_Parkinson_vs_control", outputname = "PD vs C,
  baseline"))

  # PD vs C at followup
  resFinal <- rbind(resFinal, resDF(contrast = list(c("Parkinson_Parkinson_vs_control",
  "ParkinsonParkinson.Timepointfollowup")), outputname = "PD vs C, followup"))

  # Taxa that have change differently between timepoints for PD vs C
  resFinal <- rbind(resFinal, resDF(name = "ParkinsonParkinson.Timepointfollowup", outputname = "PD
  vs C, between timepoints"))

  # Confounders: Rome III score
  resFinal <- rbind(resFinal, resDF(name = "Rome_III_constip_defec_sumscore_9.15", outputname =
  "Rome_III_constip_defec_sumscore_9.15"))

  # Confounders: BMI
  resFinal <- rbind(resFinal, resDF(name = "BMI", outputname = "BMI"))

  return(resFinal)
}

# List of all PD subjects:
pdSubj <- as.character(sample_data(subset_samples(newPDtrimNoNA,
  Parkinson=="Parkinson" & Timepoint=="baseline"))$Subject)

# 62-round leave one out loop
# with DS2 console output saved into separate log file
## NB: since this runs DESeq2 62 * 3 times, it takes hours to finish!

otuRes <- list()
genRes <- list()
famRes <- list()

outlog <- file("ds2runlog.txt", open = "wt")
sink(outlog, type = "message")
for(i in pdSubj){
  print(paste("Dropped sample:", i))
}

```

```

newPDtrim2 <- subset_samples(newPDtrimNoNA, Subject != i)
sample_data(newPDtrim2)$DummySubject <- factor(rep(1:61, 4))

newPDtrimGen2 <- collapseTaxLevel(newPDtrim2, level = "Genus", fixUnclassifieds = FALSE)
newPDtrimGen2 <- subset_taxa(newPDtrimGen2, Genus != "unclassified")

newPDtrimFam2 <- collapseTaxLevel(newPDtrim2, level = "Family", fixUnclassifieds = FALSE)
newPDtrimFam2 <- subset_taxa(newPDtrimFam2, Family != "unclassified")

otuRes[[i]] <- dsPDTP_Conf(newPDtrim2)
genRes[[i]] <- dsPDTP_Conf(newPDtrimGen2)
famRes[[i]] <- dsPDTP_Conf(newPDtrimFam2)
}

```

```

## [1] "Dropped sample: P0004"
## [1] "Dropped sample: P0005"
## [1] "Dropped sample: P0008"
## [1] "Dropped sample: P0009"
## [1] "Dropped sample: P0010"
## [1] "Dropped sample: P0011"
## [1] "Dropped sample: P0012"
## [1] "Dropped sample: P0014"
## [1] "Dropped sample: P0015"
## [1] "Dropped sample: P0016"
## [1] "Dropped sample: P0017"
## [1] "Dropped sample: P0018"
## [1] "Dropped sample: P0019"
## [1] "Dropped sample: P0020"
## [1] "Dropped sample: P0024"
## [1] "Dropped sample: P0028"
## [1] "Dropped sample: P0031"
## [1] "Dropped sample: P0034"
## [1] "Dropped sample: P0037"
## [1] "Dropped sample: P0038"
## [1] "Dropped sample: P0042"
## [1] "Dropped sample: P0043"
## [1] "Dropped sample: P0046"
## [1] "Dropped sample: P0047"
## [1] "Dropped sample: P0048"
## [1] "Dropped sample: P0050"
## [1] "Dropped sample: P0051"
## [1] "Dropped sample: P0052"
## [1] "Dropped sample: P0053"
## [1] "Dropped sample: P0056"
## [1] "Dropped sample: P0057"
## [1] "Dropped sample: P0058"
## [1] "Dropped sample: P0059"
## [1] "Dropped sample: P0060"
## [1] "Dropped sample: P0061"
## [1] "Dropped sample: P0063"
## [1] "Dropped sample: P0066"
## [1] "Dropped sample: P0067"
## [1] "Dropped sample: P0068"
## [1] "Dropped sample: P0070"
## [1] "Dropped sample: P0071"
## [1] "Dropped sample: P0072"
## [1] "Dropped sample: P0073"
## [1] "Dropped sample: P0074"
## [1] "Dropped sample: P0077"
## [1] "Dropped sample: P0079"
## [1] "Dropped sample: P0085"
## [1] "Dropped sample: P0087"
## [1] "Dropped sample: P0088"

```

```
## [1] "Dropped sample: P0094"
## [1] "Dropped sample: P0095"
## [1] "Dropped sample: P0099"
## [1] "Dropped sample: P0100"
## [1] "Dropped sample: P0103"
## [1] "Dropped sample: P0105"
## [1] "Dropped sample: P0107"
## [1] "Dropped sample: P0114"
## [1] "Dropped sample: P0115"
## [1] "Dropped sample: P0116"
## [1] "Dropped sample: P0118"
## [1] "Dropped sample: P0119"
## [1] "Dropped sample: P0120"
```

```
sink(file = NULL, type = "message")

dsLoopResults<-function(resList){
  resAverages<-resList[[1]][, 7:ncol(resList[[1]])]
  resAverages$meanLog2fc <- rowMeans(rbind(sapply(resList, '[', "log2FoldChange")), na.rm = TRUE)
  resAverages$sdLog2fc <- rowSds(rbind(sapply(resList, '[', "log2FoldChange")), na.rm = TRUE)
  resAverages$meanPadj <- rowMeans(rbind(sapply(resList, '[', "padj")), na.rm = TRUE)
  resAverages$sdPadj <- rowSds(rbind(sapply(resList, '[', "padj")), na.rm = TRUE)
  return(resAverages)
}

otuResAverages <- dsLoopResults(otuRes)
genResAverages <- dsLoopResults(genRes)
famResAverages <- dsLoopResults(famRes)

dsCvsPDConfOTU <- data.frame(otuResAverages, Level = "OTU")
dsCvsPDConfGen <- data.frame(genResAverages, Level = "Genus")
dsCvsPDConfFam <- data.frame(famResAverages, Genus = NA, Level = "Family")

dsCvsPDRes <- data.frame(rbind(data.frame(rbind(dsCvsPDConfOTU, dsCvsPDConfGen, dsCvsPDConfFam),
  Model = "Conf, dummySubject, loop")))

write.table(file = "ds2_results_full.txt", dsCvsPDRes)
```

Rearrange results for export & downstream comparisons:

## Table S4C

```
# Overall trimming of the results table
dsResFull <- dsCvsPDRes[, c("Level", "Contrast", "Family", "Genus", "meanLog2fc", "sdLog2fc",
  "meanPadj", "sdPadj")]
dsResFull$Contrast <- factor(dsResFull$Contrast, levels = c("PD vs C, baseline", "PD vs C, between
  timepoints", "PD vs C, followup", "Rome_III_constip_defec_sumscore_9.15", "BMI"))

# Taxon as a single column
dsResFull[dsResFull$Level == "OTU", "Taxon"] <- substr(rownames(dsResFull[dsResFull$Level ==
  "OTU",]), start = 1, stop = 7)
dsResFull[dsResFull$Level == "Genus", "Taxon"] <- as.vector(dsResFull[dsResFull$Level == "Genus",
  "Genus"])
dsResFull[dsResFull$Level == "Family", "Taxon"] <- as.vector(dsResFull[dsResFull$Level == "Family",
  "Family"])
rownames(dsResFull) <- NULL

dsResFull <- dsResFull[, c("Level", "Contrast", "Taxon", "meanLog2fc", "sdLog2fc", "meanPadj",
  "sdPadj")]

# Trim results for exporting
dsResExport <- subset(dsResFull, meanPadj < 0.05)
dsResExport <- dsResExport[order(dsResExport$Level, dsResExport$Contrast, dsResExport$Taxon),]
```

```
# Add genus classification to the OTUs
dsResExport[dsResExport$Level == "OTU", "Taxon"] <- paste(dsResExport[dsResExport$Level == "OTU",
  "Taxon"], " (", gsub("_", " ", tax_table(newPD)[dsResExport[dsResExport$Level == "OTU",
  "Taxon"], "Genus"]), ")", sep = "")
rownames(dsResExport) <- NULL
```

```
kable_styling(kable(dsResExport, digits = 4), font_size = 10)
```

| Level  | Contrast                             | Taxon                               | meanLog2fc | sdLog2fc | meanPadj | sdPadj |
|--------|--------------------------------------|-------------------------------------|------------|----------|----------|--------|
| OTU    | PD vs C, baseline                    | Otu0062 (Blautia)                   | -4.3308    | 0.1274   | 0.0485   | 0.0076 |
| OTU    | PD vs C, baseline                    | Otu0264 (Butyrivimonas)             | -9.3180    | 0.0584   | 0.0470   | 0.0064 |
| OTU    | BMI                                  | Otu0051 (Clostridium sensu stricto) | 0.6295     | 0.0186   | 0.0000   | 0.0001 |
| OTU    | BMI                                  | Otu0582 (Actinomyces)               | -0.2213    | 0.0164   | 0.0192   | 0.1256 |
| Genus  | PD vs C, baseline                    | Clostridium_XIVa                    | 5.3209     | 0.1209   | 0.0000   | 0.0000 |
| Genus  | PD vs C, baseline                    | Clostridium_XVIII                   | -7.2388    | 1.1429   | 0.0428   | 0.1221 |
| Genus  | PD vs C, baseline                    | Dialister                           | -11.3419   | 1.4701   | 0.0161   | 0.1267 |
| Genus  | PD vs C, baseline                    | Prevotella                          | -6.1119    | 0.1148   | 0.0417   | 0.0085 |
| Genus  | PD vs C, baseline                    | Romboutsia                          | 6.5350     | 0.4349   | 0.0294   | 0.0064 |
| Genus  | PD vs C, followup                    | Clostridium_IV                      | 2.7394     | 0.0838   | 0.0489   | 0.0126 |
| Genus  | PD vs C, followup                    | Clostridium_XIVa                    | 5.0995     | 0.1180   | 0.0000   | 0.0000 |
| Genus  | PD vs C, followup                    | Dialister                           | -11.0257   | 1.4695   | 0.0161   | 0.1265 |
| Genus  | PD vs C, followup                    | Prevotella                          | -6.2879    | 1.0855   | 0.0432   | 0.0044 |
| Genus  | PD vs C, followup                    | Romboutsia                          | 6.3534     | 0.4442   | 0.0431   | 0.0064 |
| Genus  | Rome_III_constip_defec_sumscore_9.15 | Bifidobacterium                     | 0.1903     | 0.0050   | 0.0006   | 0.0011 |
| Genus  | BMI                                  | Clostridium_sensu_stricto           | 0.7635     | 0.0198   | 0.0000   | 0.0000 |
| Genus  | BMI                                  | Coprococcus                         | -0.3734    | 0.0126   | 0.0051   | 0.0046 |
| Family | PD vs C, baseline                    | Porphyromonadaceae                  | -2.9176    | 0.1300   | 0.0031   | 0.0006 |
| Family | PD vs C, baseline                    | Prevotellaceae                      | -7.4107    | 0.2141   | 0.0018   | 0.0006 |
| Family | PD vs C, baseline                    | Veillonellaceae                     | -6.5409    | 0.9537   | 0.0164   | 0.1259 |
| Family | PD vs C, followup                    | Porphyromonadaceae                  | -2.7642    | 0.1283   | 0.0058   | 0.0011 |
| Family | PD vs C, followup                    | Prevotellaceae                      | -7.4819    | 0.2080   | 0.0015   | 0.0006 |
| Family | PD vs C, followup                    | Veillonellaceae                     | -7.0958    | 0.9588   | 0.0162   | 0.1268 |
| Family | Rome_III_constip_defec_sumscore_9.15 | Bifidobacteriaceae                  | 0.1881     | 0.0040   | 0.0002   | 0.0002 |
| Family | BMI                                  | Clostridiaceae_1                    | 0.7520     | 0.0206   | 0.0000   | 0.0000 |

```
## Export
write.csv(dsResExport, "Outputs/table_s4c.csv")

# Trim results further for downstream comparisons
dsRes <- subset(dsResFull, Contrast != "Rome_III_constip_defec_sumscore_9.15" & Contrast != "BMI" &
  Contrast != "PD vs C, between timepoints")[, c("meanPadj", "Taxon", "Contrast", "Level")]

# Timepoint
dsRes[grepl("baseline", dsRes$Contrast), "Timepoint"] <- "baseline"
dsRes[grepl("followup", dsRes$Contrast), "Timepoint"] <- "followup"
dsRes$Timepoint <- factor(dsRes$Timepoint)

# Final table
dsRes <- dsRes[, c("Taxon", "Level", "Timepoint", "meanPadj")]
colnames(dsRes) <- c("Taxon", "Level", "Timepoint", "pval")
```

## Compare and contrast the three methods

A rather complicated and long-winded way of making a nice summarized table of taxa of interest for exporting:

```
resAll <- rbind(data.frame(ancomRes, Method = "ANCOM"),
  data.frame(dsRes, Method = "DESeq2"),
  data.frame(rfRes, Method = "RF"))

resAllOnlySigs <- subset(resAll, pval < 0.05 | is.na(pval))
# (the "is.na" part is for ANCOM, which doesn't provide p-values;
# all the taxa listed for ANCOM were flagged as differentially abundant)

## Collect lists of taxa that overlap across methods (significant at either timepoint)

# OTUs
# (none for DS2)
```

```

sigsPerMethodOTUs <- dcast(subset(resAllOnlySigs, Level == "OTU"), Taxon ~ Method)
overlapSigOTUs <- as.character(sigsPerMethodOTUs[which(rowSums(sigsPerMethodOTUs[, 2:3] > 0) > 1),
  "Taxon"])

# Genera
sigsPerMethodGen <- dcast(subset(resAllOnlySigs, Level == "Genus"), Taxon ~ Method)
overlapSigGen <- as.character(sigsPerMethodGen[which(rowSums(sigsPerMethodGen[, 2:4] > 0) > 1),
  "Taxon"])

# Families
sigsPerMethodFam <- dcast(subset(resAllOnlySigs, Level == "Family"), Taxon ~ Method)
overlapSigFam <- as.character(sigsPerMethodFam[which(rowSums(sigsPerMethodFam[, 2:4] > 0) > 1),
  "Taxon"])

# Collect result tables in comparison to literature
# (using the "litSigs" list of taxa from the literature imported earlier)
# so that the resulting list includes taxa that were either
# 1) detected by multiple tools in the current analyses
# 2) reported in previous literature & have p < 0.1 for at least one tool in the current analyses

# OTUs
# Starting from the list of species and genera from literature:
litSigs <- read.csv("Inputs/sigtaxa_from_literature.csv", sep = "\t")
litGenSpec <- sort(unique(c(as.character(subset(litSigs, Level == "genus")$Taxon.mentioned), gsub("
  .*", "", as.character(subset(litSigs, Level == "species")$Taxon.mentioned))))))

resLitOTUs <- subset(resAll, Level == "OTU")
resLitOTUs$Genus <- tax_table(newPD)[as.character(resLitOTUs$Taxon), "Genus"]
resLitOTUs <- subset(resLitOTUs, Taxon %in% overlapSigOTUs | (Genus %in% litGenSpec & (pval < 0.1 |
  Method == "ANCOM")))

# Genera
resLitGen <- subset(resAll, Taxon %in% overlapSigGen | (Taxon %in% subset(litSigs, Level ==
  "genus")$Taxon.mentioned & (pval < 0.1 | Method == "ANCOM")))

# Families
resLitFam <- subset(resAll, Taxon %in% overlapSigFam | (Taxon %in% subset(litSigs, Level ==
  "family")$Taxon.mentioned & (pval < 0.1 | Method == "ANCOM")))

# Collect the lists of taxa to level-specific vectors:
sharedOtus <- sort(unique(resLitOTUs$Taxon))
sharedOtus <- paste(sharedOtus, tax_table(newPD)[sharedOtus, "Genus"])
sharedGen <- as.character(unique(resLitGen$Taxon))
sharedFam <- as.character(unique(resLitFam$Taxon))

# Make a new dataframe with the relative abundances of these taxa:
sharedSigAbunds <- data.frame(row.names = rownames(sample_data(newPD)))
sharedSigAbunds$Parkinson <- factor(sample_data(newPD)$Parkinson, labels = c("control", "Parkinson"))
sharedSigAbunds$Timepoint <- sample_data(newPD)$Timepoint

sharedSigAbunds <- cbind(sharedSigAbunds,
  t(prop.table(otu_table(newPD), 2) * 100)[, gsub(" .*", "", sharedOtus)],
  t(prop.table(otu_table(newPDgen), 2) * 100)[, sharedGen],
  t(prop.table(otu_table(newPDFam), 2) * 100)[, sharedFam])

# Function to summarize taxonomy results to a nice table
sigResToTable <- function(fulldf, taxlist){

  df <- subset(fulldf, fulldf$Taxon %in% taxlist)
  df <- df[order(df$Taxon),]
  df$pval <- round(df$pval, digits = 4)
  df[df$Method == "ANCOM", "pval"] <- 0

```



```

df <- dcast(df, Timepoint + Method ~ Taxon, value.var = "pval")

tspos <- grep("Method", colnames(df)) + 1
endpos <- ncol(df)
df[df$Method == "ANCOM", tspos:endpos][df[df$Method == "ANCOM", tspos:endpos] == 0] <-
  "significant"
df[tspos:endpos][df[tspos:endpos] < 0.001] <- "<0.001"
df[df$Method == "ANCOM", tspos:endpos][is.na(df[df$Method == "ANCOM", tspos:endpos])] <- "n.s."

df <- t(df)
colnames(df) <- paste("p", as.character(df["Method", ]), df["Timepoint", ], sep = "_")
df <- df[3:nrow(df), ]

df <- df[taxlist, ]

return(df)
}

# Function to calculate mean statistics for each taxon in each group
source("Inputs/taxaSummarizer.R")

groupMeanSD <- function(phyloObj, taxlist, var, sigdec = 3){
  df <- relAbundSummary(phyloObj, byVariable = var)[taxlist,]
  meanDF <- sapply(levels(sample_data(phyloObj)[[var]]), function(x)
    as.character(paste(unlist(round(df[paste("Mean", var, x, sep = "_")], sigdec)), " ± ",
      unlist(round(df[paste("SD", var, x, sep = "_")], sigdec)), sep = "")))
  if(length(taxlist) == 1){
    meanDF <- data.frame(Taxon = taxlist, t(meanDF))
  } else {
    meanDF <- as.data.frame(cbind(taxlist, meanDF), stringsAsFactors = FALSE)
  }
  colnames(meanDF) <- c("Taxon", paste("MeanSD", levels(sample_data(phyloObj)[[var]])))
  return(meanDF)
}

# Collect p-values & taxon relative abundances into dataframes per level

# OTUs
resAllSharedOTUsTable <- cbind(sigResToTable(resAll, gsub(" .*", "", sharedOtus)),
  groupMeanSD(newPD, gsub(" .*", "", sharedOtus), "PD_TP"))
rownames(resAllSharedOTUsTable) <- sharedOtus
resAllSharedOTUsTable$LitMatch <- gsub(" .*", "", rownames(resAllSharedOTUsTable)) %in% litGenSpec

# Genera
resAllSharedGenTable <- cbind(sigResToTable(resAll, sharedGen), groupMeanSD(newPDgen, sharedGen,
  "PD_TP"))
resAllSharedGenTable$LitMatch <- resAllSharedGenTable$Taxon %in% subset(litSigs, Level ==
  "genus")$Taxon.mentioned

# Families
resAllSharedFamTable <- cbind(sigResToTable(resAll, sharedFam), groupMeanSD(newPDfam, sharedFam,
  "PD_TP"))
resAllSharedFamTable$LitMatch <- resAllSharedFamTable$Taxon %in% subset(litSigs, Level ==
  "family")$Taxon.mentioned

## Combine the three tables:
resAllSharedTables <- rbind(
  data.frame(resAllSharedFamTable, Level = "Family"),
  data.frame(resAllSharedGenTable, Level = "Genus"),
  data.frame(resAllSharedOTUsTable, Level = "OTU"))

# Reorder columns for export

```

```

resAllSharedTablesTrim <- resAllSharedTables[, c("Level", "LitMatch", "MeanSD.control_baseline",
"MeanSD.Parkinson_baseline", "p_ANCOM_baseline", "p_RF_baseline", "p_DESeq2_baseline",
"MeanSD.control_followup", "MeanSD.Parkinson_followup", "p_ANCOM_followup", "p_RF_followup",
"p_DESeq2_followup")]

# Reorder rows for export
resAllSharedTablesTrim$LitMatch <- factor(resAllSharedTablesTrim$LitMatch)
levels(resAllSharedTablesTrim$LitMatch) <- c("no", "yes")

resAllSharedTablesTrim <- resAllSharedTablesTrim[order(resAllSharedTablesTrim$Level,
resAllSharedTablesTrim$LitMatch, decreasing = FALSE),]

```

**Table 8**

Export table:

```

kable(resAllSharedTablesTrim[, 1:7], col.names = c("Level", "LitMatch", "MeanSD control baseline",
"MeanSD Parkinson baseline", "p_ANCOM baseline", "p_RF baseline", "p_DESeq2 baseline"))

```

| Level                                 | LitMatch | MeanSD control baseline | MeanSD Parkinson baseline | p_ANCOM baseline | p_RF baseline | p_DESeq2 baseline |
|---------------------------------------|----------|-------------------------|---------------------------|------------------|---------------|-------------------|
| Puniceicoccaceae Family               | no       | 0.045 ± 0.103           | 0.01 ± 0.029              | n.s.             | 0.0099        | 0.9928            |
| Bifidobacteriaceae Family             | yes      | 2.629 ± 2.719           | 6.528 ± 8.573             | significant      | 0.1287        | 0.1512            |
| Prevotellaceae Family                 | yes      | 4.345 ± 9.22            | 0.725 ± 2.12              | significant      | 0.0099        | 0.0018            |
| Rikenellaceae Family                  | yes      | 2.201 ± 2.035           | 3.494 ± 2.899             | n.s.             | 0.0297        | 0.0749            |
| Lachnospiraceae Family                | yes      | 22.478 ± 10.241         | 16.48 ± 9.121             | n.s.             | 0.0198        | 0.9896            |
| Pasteurellaceae Family                | yes      | 0.036 ± 0.097           | 0.009 ± 0.027             | n.s.             | 0.0891        | 0.6251            |
| Lactobacillaceae Family               | yes      | 0.032 ± 0.124           | 0.28 ± 1.199              | n.s.             | 0.1287        | 0.9928            |
| Clostridium_XIVa Genus                | no       | 1.971 ± 2.631           | 1.83 ± 3.265              | n.s.             | 0.1683        | <0.001            |
| Bifidobacterium Genus                 | yes      | 2.628 ± 2.717           | 6.524 ± 8.57              | significant      | 0.0891        | 0.2442            |
| Roseburia Genus                       | yes      | 7.014 ± 6.944           | 3.588 ± 4.096             | n.s.             | 0.0198        | 0.1467            |
| Prevotella Genus                      | yes      | 4.187 ± 9.003           | 0.659 ± 2.102             | n.s.             | 0.0495        | 0.0417            |
| Anaerotruncus Genus                   | yes      | 0.056 ± 0.079           | 0.071 ± 0.084             | n.s.             | 0.0792        | 0.9863            |
| Blautia Genus                         | yes      | 2.419 ± 1.516           | 1.829 ± 1.598             | n.s.             | 0.0396        | 0.7419            |
| Lactobacillus Genus                   | yes      | 0.031 ± 0.125           | 0.278 ± 1.197             | n.s.             | 0.3564        | 0.9892            |
| Otu0003 OTU                           | yes      | 6.506 ± 6.71            | 3.115 ± 3.742             | n.s.             | 0.0198        | 0.3421            |
| Roseburia Otu0007 Bifidobacterium OTU | yes      | 1.563 ± 1.808           | 4.579 ± 6.456             | significant      | 0.0792        | 0.6127            |
| Otu0024 OTU                           | yes      | 0.904 ± 0.875           | 0.649 ± 0.903             | n.s.             | 0.0198        | 0.9997            |
| Blautia Otu0027 Ruminococcus OTU      | yes      | 0.679 ± 0.959           | 0.437 ± 0.895             | n.s.             | 0.0891        | 0.9997            |
| Otu0030 Alistipes OTU                 | yes      | 0.404 ± 0.861           | 0.955 ± 1.392             | significant      | 0.0099        | 0.9997            |
| Otu0036 Roseburia OTU                 | yes      | 0.483 ± 0.757           | 0.468 ± 1.279             | n.s.             | 0.0891        | 0.9997            |
| Otu0041 Alistipes OTU                 | yes      | 0.278 ± 0.247           | 0.448 ± 0.499             | n.s.             | 0.099         | 0.9997            |
| Otu0055 Prevotella OTU                | yes      | 0.344 ± 1.243           | 0.197 ± 1.048             | n.s.             | 0.1287        | 0.9997            |
| Otu0062 Blautia OTU                   | yes      | 0.446 ± 0.576           | 0.266 ± 0.358             | n.s.             | 0.0297        | 0.0485            |
| Otu0098 Bacteroides OTU               | yes      | 0.105 ± 0.239           | 0.29 ± 0.599              | n.s.             | 0.0297        | 0.4988            |
| Otu0109 Ruminococcus OTU              | yes      | 0.343 ± 1.142           | 0.122 ± 0.844             | n.s.             | 0.4653        | 0.9997            |
| Otu0110 Ruminococcus OTU              | yes      | 0.189 ± 0.332           | 0.136 ± 0.279             | n.s.             | 0.0198        | 0.9997            |
| Otu0131 Bacteroides OTU               | yes      | 0.183 ± 0.654           | 0.079 ± 0.256             | n.s.             | 0.4059        | 0.9982            |
| Otu0363 Lactobacillus OTU             | yes      | 0.019 ± 0.107           | 0.056 ± 0.225             | n.s.             | 0.7921        | 0.9997            |
| Otu0379 Alistipes OTU                 | yes      | 0.001 ± 0.003           | 0.041 ± 0.2               | n.s.             | 0.3168        | 0.9997            |
| Otu0464 Lactobacillus OTU             | yes      | 0.002 ± 0.009           | 0.004 ± 0.016             | n.s.             | 0.4455        | 0.9997            |



|         | Level            | LitMatch | MeanSD control baseline | MeanSD Parkinson baseline | p_ANCOM baseline | p_RF baseline | p_DESeq2 baseline |        |
|---------|------------------|----------|-------------------------|---------------------------|------------------|---------------|-------------------|--------|
| Otu0468 | Faecalibacterium | OTU      | yes                     | 0.016 ± 0.026             | 0.009 ± 0.019    | n.s.          | 0.7228            | 0.9997 |
| Otu0513 | Anaerotruncus    | OTU      | yes                     | 0.006 ± 0.006             | 0.011 ± 0.011    | n.s.          | 0.0297            | 0.9976 |

```
kable(resAllSharedTablesTrim[, 8:ncol(resAllSharedTablesTrim)], col.names = c("MeanSD control
followup", "MeanSD Parkinson followup", "p_ANCOM followup", "p_RF followup", "p_DESeq2
followup"))
```

|                    | MeanSD control followup | MeanSD Parkinson followup | p_ANCOM followup | p_RF followup | p_DESeq2 followup |
|--------------------|-------------------------|---------------------------|------------------|---------------|-------------------|
| Puniceicocaceae    | 0.032 ± 0.061           | 0.01 ± 0.03               | significant      | 0.0099        | 0.9949            |
| Bifidobacteriaceae | 2.189 ± 3.531           | 5.919 ± 8.256             | significant      | 0.0396        | 0.1499            |
| Prevotellaceae     | 2.972 ± 4.882           | 1.395 ± 3.474             | significant      | 0.0792        | 0.0015            |
| Rikenellaceae      | 2.479 ± 2.559           | 2.836 ± 2.131             | n.s.             | 0.3861        | 0.1717            |
| Lachnospiraceae    | 21.787 ± 8.964          | 17.753 ± 8.198            | n.s.             | 0.4158        | 0.9949            |
| Pasteurellaceae    | 0.059 ± 0.28            | 0.014 ± 0.052             | n.s.             | 0.1584        | 0.5849            |
| Lactobacillaceae   | 0.04 ± 0.159            | 0.226 ± 0.867             | n.s.             | 0.0396        | 0.9949            |
| Clostridium_XIVa   | 2.136 ± 2.589           | 1.501 ± 2.076             | n.s.             | 0.0198        | <0.001            |
| Bifidobacterium    | 2.188 ± 3.53            | 5.917 ± 8.256             | significant      | 0.0396        | 0.41              |
| Roseburia          | 6.683 ± 6.162           | 4.395 ± 5.298             | significant      | 0.0099        | 0.1214            |
| Prevotella         | 2.85 ± 4.854            | 1.306 ± 3.355             | significant      | 0.0297        | 0.0432            |
| Anaerotruncus      | 0.119 ± 0.501           | 0.098 ± 0.163             | n.s.             | 0.6931        | 0.99              |
| Blautia            | 2.63 ± 1.847            | 2.429 ± 2.334             | n.s.             | 0.6436        | 0.9269            |
| Lactobacillus      | 0.04 ± 0.159            | 0.221 ± 0.862             | n.s.             | 0.0297        | 0.9964            |
| Otu0003 Roseburia  | 6.144 ± 5.933           | 4.109 ± 5.027             | n.s.             | 0.0198        | 0.2749            |
| Otu0007            | 1.518 ± 3.155           | 4.029 ± 6.243             | significant      | 0.0891        | 0.6924            |
| Bifidobacterium    |                         |                           |                  |               |                   |
| Otu0024 Blautia    | 1.057 ± 1.14            | 0.712 ± 0.884             | n.s.             | 0.0198        | 0.9998            |
| Otu0027            | 0.832 ± 1.515           | 0.604 ± 1.23              | n.s.             | 0.9604        | 0.9998            |
| Ruminococcus       |                         |                           |                  |               |                   |
| Otu0030 Alistipes  | 0.711 ± 1.627           | 0.623 ± 1.134             | n.s.             | 0.5347        | 0.9998            |
| Otu0036 Roseburia  | 0.534 ± 0.771           | 0.282 ± 0.689             | n.s.             | 0.0297        | 0.9998            |
| Otu0041 Alistipes  | 0.33 ± 0.342            | 0.412 ± 0.37              | n.s.             | 0.7129        | 0.9998            |
| Otu0055 Prevotella | 0.493 ± 1.758           | 0.342 ± 1.413             | n.s.             | 0.0792        | 0.9998            |
| Otu0062 Blautia    | 0.328 ± 0.46            | 0.217 ± 0.299             | n.s.             | 0.198         | 0.1111            |
| Otu0098            | 0.111 ± 0.22            | 0.231 ± 0.407             | n.s.             | 0.0792        | 0.371             |
| Bacteroides        |                         |                           |                  |               |                   |
| Otu0109            | 0.369 ± 1.175           | 0.001 ± 0.002             | significant      | 0.0099        | 0.9998            |
| Ruminococcus       |                         |                           |                  |               |                   |
| Otu0110            | 0.205 ± 0.519           | 0.14 ± 0.322              | n.s.             | 0.1386        | 0.9998            |
| Ruminococcus       |                         |                           |                  |               |                   |
| Otu0131            | 0.209 ± 0.613           | 0.049 ± 0.205             | significant      | 0.0198        | 0.9952            |
| Bacteroides        |                         |                           |                  |               |                   |
| Otu0363            | 0.016 ± 0.122           | 0.006 ± 0.035             | n.s.             | 0.0495        | 0.9998            |
| Lactobacillus      |                         |                           |                  |               |                   |
| Otu0379 Alistipes  | 0.004 ± 0.033           | 0.047 ± 0.236             | n.s.             | 0.0198        | 0.9998            |
| Otu0464            | 0.001 ± 0.006           | 0.044 ± 0.236             | n.s.             | 0.0099        | 0.9998            |
| Lactobacillus      |                         |                           |                  |               |                   |
| Otu0468            | 0.021 ± 0.033           | 0.007 ± 0.016             | n.s.             | 0.0495        | 0.9998            |
| Faecalibacterium   |                         |                           |                  |               |                   |
| Otu0513            | 0.006 ± 0.005           | 0.012 ± 0.019             | n.s.             | 0.2079        | 0.9952            |
| Anaerotruncus      |                         |                           |                  |               |                   |

```
## Export
write.csv(resAllSharedTablesTrim, "Outputs/table_8.csv")
```

Euler diagrams of the shared taxa in the results lists:

Figure 9

```
# Summarized data for the plots:
vennDFbl <- table(subset(resAllOnlySigs, Timepoint == "baseline")[, c("Taxon", "Method")])
vennDFfu <- table(subset(resAllOnlySigs, Timepoint == "followup")[, c("Taxon", "Method")])

vennValues <- data.frame(row.names = c("baseline", "followup"))

# Taxa detected by each method alone
vennValues$ANCOM <- c(sum(vennDFbl[, 1]), sum(vennDFfu[, 1]))
vennValues$DESeq2 <- c(sum(vennDFbl[, 2]), sum(vennDFfu[, 2]))
vennValues$RandomForest <- c(sum(vennDFbl[, 3]), sum(vennDFfu[, 3]))
```

```

# Taxa detected by pairs of methods
vennValues$DS_AN <- c(sum(rowSums(vennDFbl[, 1:2]) == 2), sum(rowSums(vennDFfu[, 1:2]) == 2))
vennValues$AN_RF <- c(sum(rowSums(vennDFbl[, c(1,3)]) == 2), sum(rowSums(vennDFfu[, c(1,3)]) == 2))
vennValues$DS_RF <- c(sum(rowSums(vennDFbl[, 2:3]) == 2), sum(rowSums(vennDFfu[, 2:3]) == 2))

# Taxa detected by all three
vennValues$AN_DS_RF <- c(sum(rowSums(vennDFbl) == 3), sum(rowSums(vennDFfu) == 3))

# Options for plotting:
library("eulerr")

eulerr_options(quantities = list(fontsize = 6))
euCols <- setNames(
  c("#c8ffec", "#d5c0ff", "#c3e6fc", "#CFE0F6", "#95d9d2", "#aec6fc", "#8dbfc6"),
  c("an", "ds", "rf", "ds+an", "an+rf", "ds+rf", "all"))

# Baseline
eulerBL <- as.vector(t(vennValues[1,]))
names(eulerBL) <- c("ANCOM", "DESeq2", "RandomForest", "ANCOM&DESeq2", "DESeq2&RandomForest",
  "ANCOM&RandomForest", "ANCOM&DESeq2&RandomForest")
eulerBLfit <- euler(eulerBL, shape = "circle", input = "union")

# Labels for the detected taxa
taxLabelSort <- function(taxa){
  if(length(grep("Otu", taxa)) < 5){
    tax_sorted <- paste(paste(sort(grep("Otu", taxa, invert = TRUE, value = TRUE)), collapse = "\n"),
      paste(grep("Otu", taxa, value = TRUE), collapse = "\n"), sep = "\n")
  } else {
    tax_sorted <- paste(paste(sort(grep("Otu", taxa, invert = TRUE, value = TRUE)), collapse = "\n"),
      "&", paste(length(grep("Otu", taxa)), "OTUs"), sep = "\n")
  }
  return(tax_sorted)
}

eulerTaxaBL <- vector(length = 7)
names(eulerTaxaBL) <- c("ds", "an", "rf", "ds+an", "ds+rf", "an+rf", "all")

eulerTaxaBL["an"] <- taxLabelSort(names(which(vennDFbl[, "ANCOM"] == 1 & rowSums(vennDFbl) == 1)))
eulerTaxaBL["ds"] <- taxLabelSort(names(which(vennDFbl[, "DESeq2"] == 1 & rowSums(vennDFbl) == 1)))
eulerTaxaBL["rf"] <- taxLabelSort(names(which(vennDFbl[, "RF"] == 1 & rowSums(vennDFbl) == 1)))
eulerTaxaBL["ds+rf"] <- paste(names(which(vennDFbl[which(rowSums(vennDFbl) == 2), ][, "ANCOM"] == 0)),
  collapse = "\n")
eulerTaxaBL["an+rf"] <- paste(names(which(vennDFbl[which(rowSums(vennDFbl) == 2), ][, "DESeq2"] == 0)),
  collapse = "\n")
eulerTaxaBL["ds+an"] <- "none"
eulerTaxaBL["all"] <- names(which(rowSums(vennDFbl) == 3))

euColsBL <- euCols[names(eulerTaxaBL)]
euColsBL["ds+an"] <- "white"
euBL <- plot(eulerBLfit, labels = FALSE, alpha = 0.75, quantities = eulerTaxaBL, fills = euColsBL)

# Follow-up
eulerTaxaFU <- vector(length = 7)
names(eulerTaxaFU) <- names(euCols)

eulerTaxaFU["an"] <- taxLabelSort(names(which(vennDFfu[, "ANCOM"] == 1 & rowSums(vennDFfu) == 1)))
eulerTaxaFU["ds"] <- taxLabelSort(names(which(vennDFfu[, "DESeq2"] == 1 & rowSums(vennDFfu) == 1)))
eulerTaxaFU["rf"] <- taxLabelSort(names(which(vennDFfu[, "RF"] == 1 & rowSums(vennDFfu) == 1)))

```

```
eulerTaxaFU["ds+rf"] <- names(which(vennDFfu[which(rowSums(vennDFfu) == 2),][,"ANCOM"] == 0))
eulerTaxaFU["an+rf"] <- taxLabelSort(names(which(vennDFfu[which(rowSums(vennDFfu)==2),][,"DESeq2"]
== 0)))
eulerTaxaFU["ds+an"] <- names(which(vennDFfu[which(rowSums(vennDFfu) == 2),][,"RF"] == 0))
eulerTaxaFU["all"] <- names(which(rowSums(vennDFfu) == 3))

eulerFU <- as.vector(t(vennValues[2,]))
names(eulerFU) <- c("ANCOM", "DESeq2", "RandomForest", "ANCOM&DESeq2", "ANCOM&RandomForest",
"DESeq2&RandomForest", "ANCOM&DESeq2&RandomForest")
eulerFUfit <- euler(eulerFU, shape = "circle", input = "union")

# Make plots

library("grid")

euBL <- plot(eulerBLfit, labels = FALSE, alpha = 0.75, quantities = eulerTaxaBL, fills = euColsBL)
euBL
```

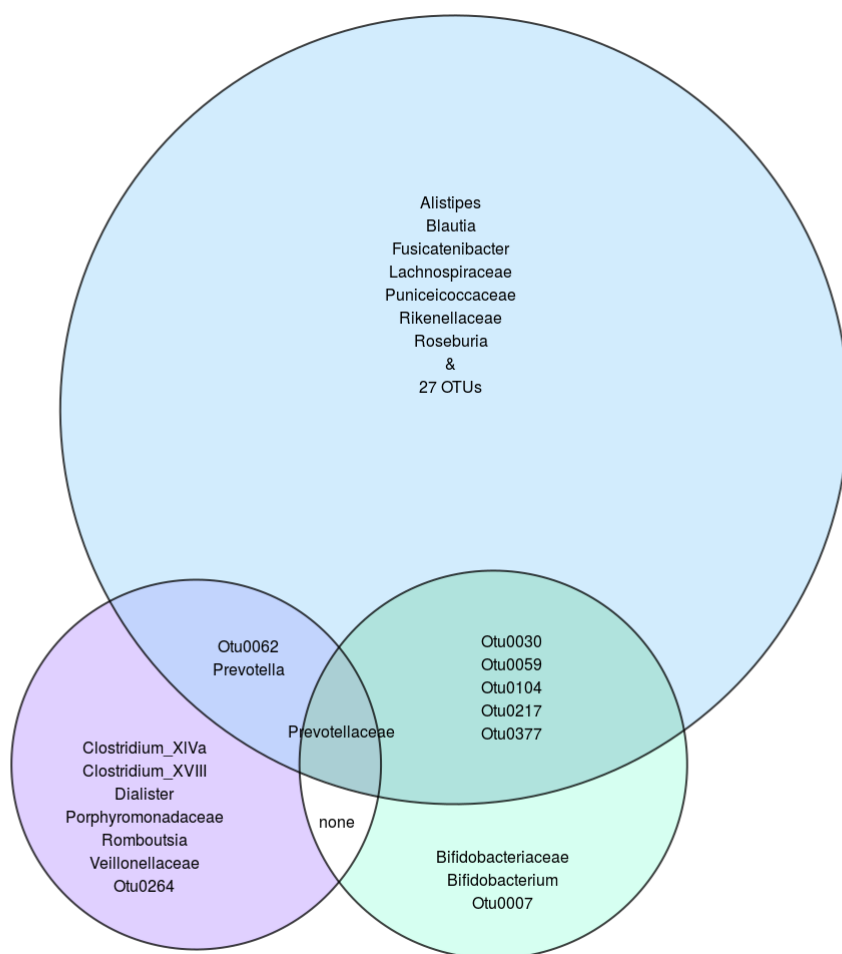

```
euFU <- plot(eulerFUfit, labels = FALSE, alpha = 0.75, quantities = eulerTaxaFU, fills = euCols)
euFU
```

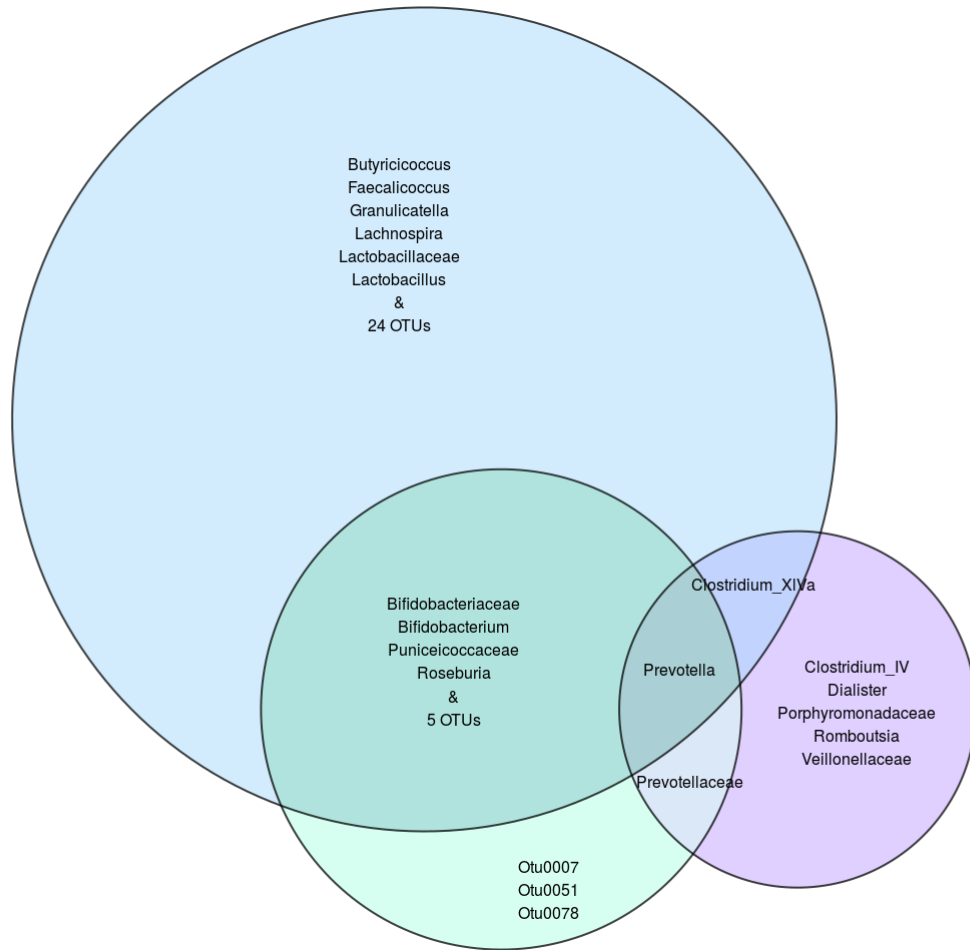

```

blank_panel <- grid::rectGrob(gp = grid::gpar(col = "white"))

## Export to pdf
## (with added, manually placed text labels)

pdf("Outputs/fig9_temp.pdf", width = halpage, height = maxhi*0.8, useDingbats = FALSE)

grid.arrange(euBL, blank_panel, euFU, ncol = 1, heights = c(1, 0.1, 1))
grid.text("A.", gp = gpar(font = 2, size = 12), x = unit(0.05, "npc"), y = unit(0.98, "npc"))
grid.text("B.", gp = gpar(font = 2, size = 12), x = unit(0.05, "npc"), y = unit(0.46, "npc"))

grid.text("RandomForest", gp = gpar(font = 2), x = unit(0.54, "npc"), y = unit(0.965, "npc"))
grid.text("DESeq2", gp = gpar(font = 2), x = unit(0.12, "npc"), y = unit(0.725, "npc"))
grid.text("ANCOM", gp = gpar(font = 2), x = unit(0.53, "npc"), y = unit(0.735, "npc"))

grid.text("RandomForest", gp = gpar(font = 2), x = unit(0.435, "npc"), y = unit(0.435, "npc"))
grid.text("DESeq2", gp = gpar(font = 2), x = unit(0.86, "npc"), y = unit(0.225, "npc"))
grid.text("ANCOM", gp = gpar(font = 2), x = unit(0.5, "npc"), y = unit(0.255, "npc"))

dev.off()

## png
## 2

# Embed fonts
embedFonts("Outputs/fig9_temp.pdf", outfile = "Outputs/figure9.pdf")

```

Box plots showing the abundances of all the taxa of interest:

Figure 10

```

colnames(sharedSigAbunds)[grep("Otu", colnames(sharedSigAbunds))] <- gsub(" ", "\n",
  colnames(sharedSigAbunds)[grep("Otu", colnames(sharedSigAbunds))])

# Only for genera and families
sharedSigAbundsGF <- sharedSigAbunds[, -grep("Otu", colnames(sharedSigAbunds))]

# sort taxa per taxonomy?
sharedTaxaPerTax <- sort(colnames(sharedSigAbundsGF[, 3:(ncol(sharedSigAbundsGF))]))

# Plotting function
diffPlot <- function(df){
  ggplot(df, aes(variable, value, fill = Parkinson)) +
    geom_boxplot(outlier.size = 0.1, lwd = 0.25) +
    facet_grid(Timepoint~.) +
    scale_fill_manual(values = c("gray80", "seagreen4"),
      labels = c("control", "Parkinson"),
      name = "Type") +
    theme_bw(base_size = 9) +
    xlab(NULL) +
    ylab("\nRelative abundance (%)") +
    theme(legend.key.height = unit(1.5, "line"),
      panel.grid = element_blank(),
      legend.position = "none",
      axis.text = element_text(color = "black"),
      axis.text.x = element_text(face = "italic"),
      plot.title = element_text(face = "italic"))
}

abundPlotsAll <- list()

# Make a table of the taxonomy information
taxForPlot <- rbind(data.frame(Genus = NA,
  Family = setNames(sharedFam, sharedFam)),
  as.data.frame(tax_table(newPDgen)[sharedGen, c("Genus", "Family")]))

abundPlotsAll[["Bifidobacteriaceae"]] <- diffPlot(
  melt(sharedSigAbunds[, c(rownames(subset(taxForPlot, Family == "Bifidobacteriaceae")),
    "Parkinson", "Timepoint"]))) +
  ggtitle("Bifidobacteriaceae")

abundPlotsAll[["Lachnospiraceae"]] <- diffPlot(
  melt(sharedSigAbunds[, c(rownames(subset(taxForPlot, Family == "Lachnospiraceae")),
    "Parkinson", "Timepoint"]))) +
  ggtitle("Lachnospiraceae")

abundPlotsAll[["Lactobacillaceae"]] <- diffPlot(
  melt(sharedSigAbunds[, c(rownames(subset(taxForPlot, Family == "Lactobacillaceae")),
    "Parkinson", "Timepoint"]))) +
  ggtitle("Lactobacillaceae")

abundPlotsAll[["Prevotellaceae"]] <- diffPlot(
  melt(sharedSigAbunds[, c(rownames(subset(taxForPlot, Family == "Prevotellaceae")),
    "Parkinson", "Timepoint"]))) +
  ggtitle("Prevotellaceae")

abundPlotsAll[["Puniceicoccaceae"]] <- diffPlot(
  melt(sharedSigAbunds[, c(rownames(subset(taxForPlot, Family == "Puniceicoccaceae")),
    "Parkinson", "Timepoint"]))) +
  ggtitle("Puniceicoccaceae")

abundPlotsAll[["Rikenellaceae"]] <- diffPlot(melt(
  sharedSigAbunds[, c(rownames(subset(taxForPlot, Family == "Rikenellaceae")),

```

```

      "Parkinson", "Timepoint"]])) +
  ggtitle("Rikenellaceae")

abundPlotsAll[["Ruminococcaceae"]] <- diffPlot(
  melt(sharedSigAbunds[, c(rownames(subset(taxForPlot, Family == "Ruminococcaceae")),
    "Parkinson", "Timepoint"]])) +
  ggtitle("Ruminococcaceae")

apleg <- g_legend(diffPlot(melt(
  sharedSigAbunds[, c(sharedTaxaPerTax[1], "Parkinson", "Timepoint")])) +
  theme(legend.position = "right"))

blank_panel <- grid::rectGrob(gp = grid::gpar(col = "white"))

abundPlotsByTax <- arrangeGrob(
  arrangeGrob(abundPlotsAll[["Bifidobacteriaceae"]],
    abundPlotsAll[["Lactobacillaceae"]], apleg,
    nrow = 1, widths = c(1.85, 1.85, 1.1)),
  arrangeGrob(abundPlotsAll[["Lachnospiraceae"]],
    abundPlotsAll[["Ruminococcaceae"]],
    widths = c(3.15, 1.25)),
  arrangeGrob(abundPlotsAll[["Prevotellaceae"]],
    abundPlotsAll[["Rikenellaceae"]],
    abundPlotsAll[["Puniceicoccaceae"]],
    nrow = 1, widths = c(1.85, 1.3, 1.3)),
  ncol = 1)

grid.arrange(abundPlotsByTax)

```

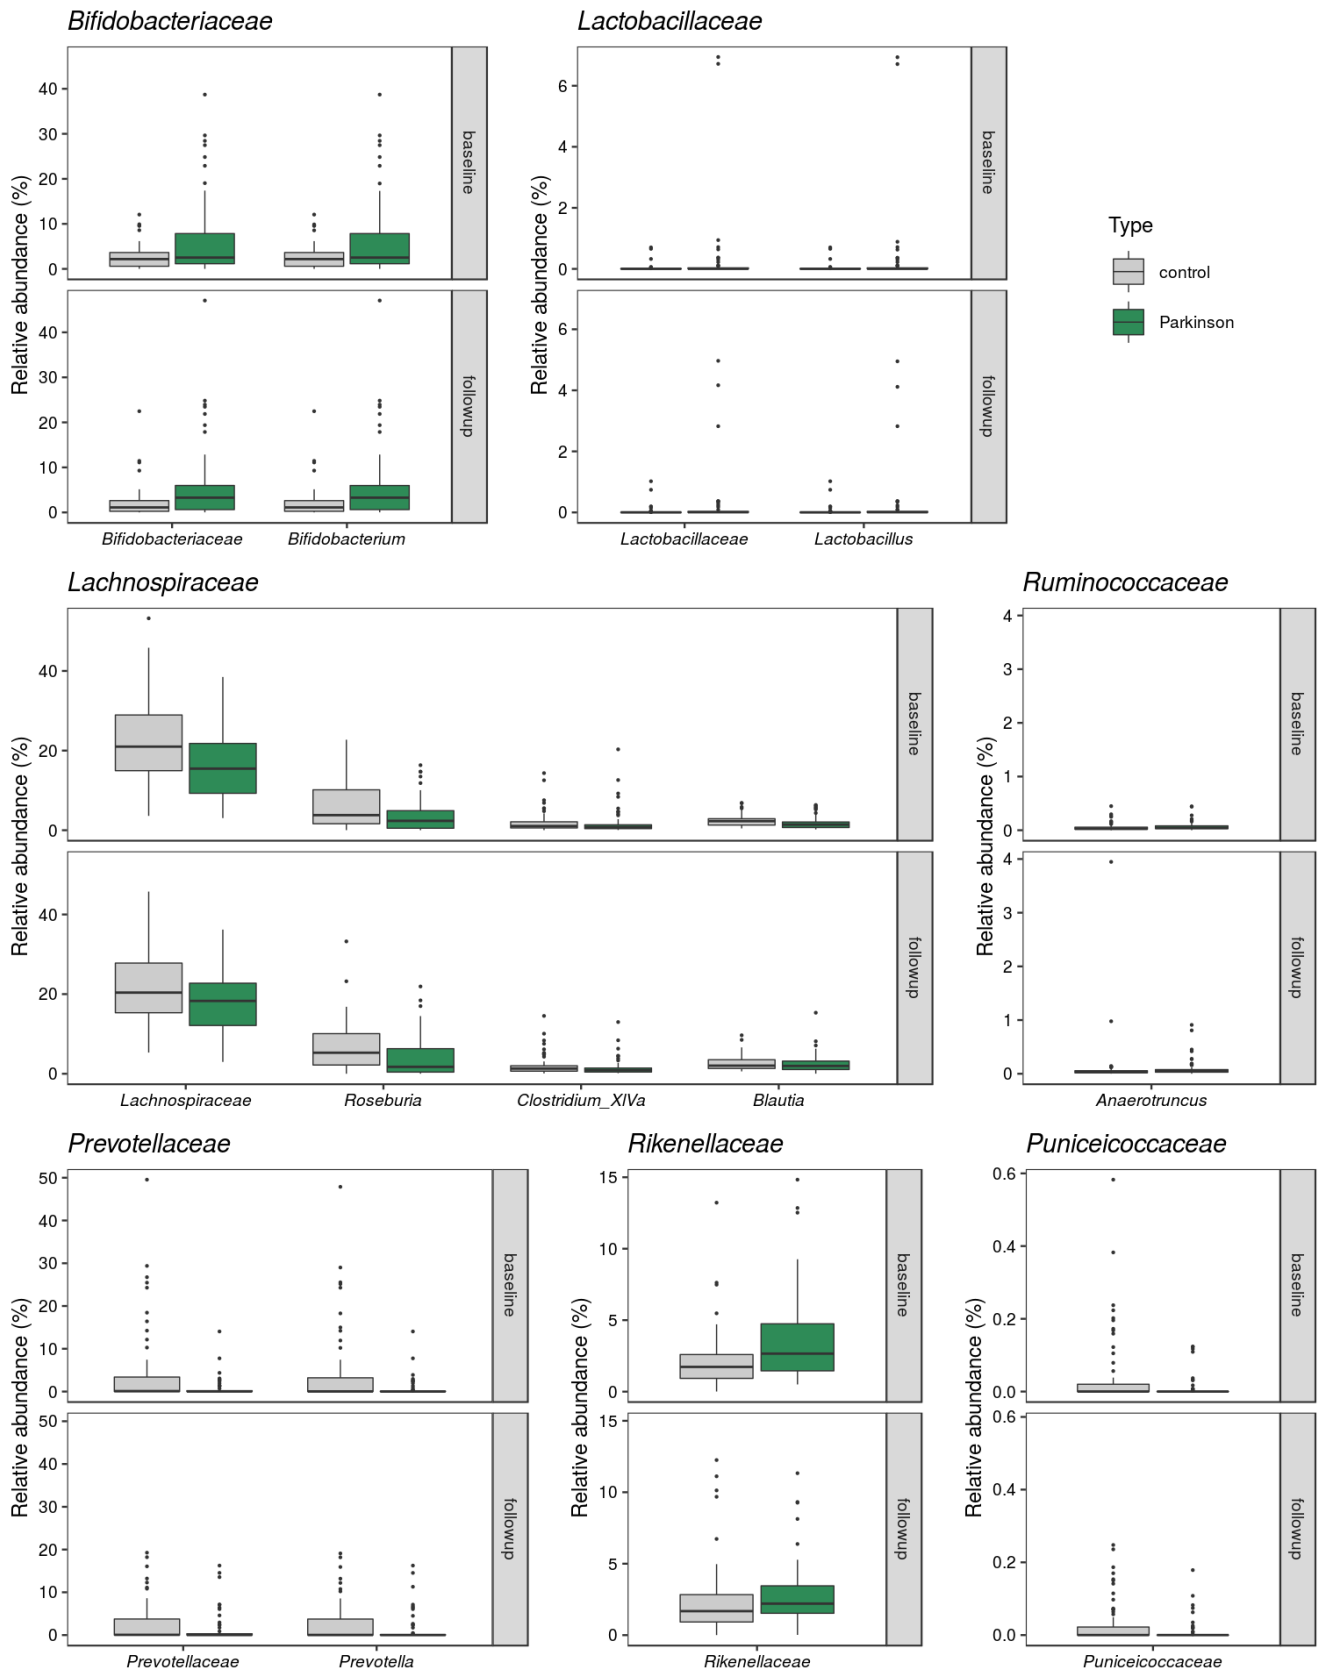

```
## Export to pdf
```

```
ggsave(abundPlotsByTax, filename = "Outputs/figure10.pdf", device = cairo_pdf,
  height = maxhi*0.8, width = fullpage, units = "in")
```

## Progression

### Data filtering

Starting with the phyloseq object that only has the samples that were selected for the progression comparisons, trim to taxa that are present in around 1/10 samples and drop the “unclassified” bin.

```
round(nrow(sample_data(progPhy)) / 10)

## [1] 11

trim_co2 <- round(nrow(sample_data(progPhy)) / 10)

progPhyTrim <- filter_taxa(progPhy, function(x) sum(x > 1) > trim_co2 & sum(x) > 999, prune = TRUE)

progPhyGen <- collapseTaxLevel(progPhy, level = "Genus", fixUnclassifieds = FALSE)
progPhyTrimGen <- filter_taxa(progPhyGen, function(x) sum(x > 1) > trim_co2, prune = TRUE)
progPhyTrimGen <- subset_taxa(progPhyTrimGen, Genus != "unclassified")

progPhyFam <- collapseTaxLevel(progPhy, level = "Family", fixUnclassifieds = FALSE)
progPhyTrimFam <- filter_taxa(progPhyFam, function(x) sum(x > 1) > trim_co2, prune = TRUE)
progPhyTrimFam <- subset_taxa(progPhyTrimFam, Family != "unclassified")
```

### ANCOM

Compare timepoints separately, correcting for COMT inhibitor use.

```
# Function for comparisons
ancom2prog <- function(phyloObj, adjp = 2){
  otu_data <- data.frame(Sample.ID = sample_data(phyloObj)$Subject,
    as.data.frame(as.matrix(t(otu_table(phyloObj))))))
  meta_data <- data.frame(Sample.ID = sample_data(phyloObj)$Subject,
    ProgCat = sample_data(phyloObj)$ProgCat,
    COMT = sample_data(phyloObj)$meds_COMT_inhibitor)
  res <- ANCOM.main(OTUdat = otu_data,
    Vardat = meta_data,
    adjusted = TRUE,
    repeated = FALSE,
    main.var = "ProgCat",
    adj.formula = "COMT",
    repeat.var = NULL,
    longitudinal = FALSE,
    random.formula = NULL,
    multcorr = adjp,
    sig = 0.05,
    prev.cut = 0.9)
  return(res)
}

# Run comparisons

# OTUs
## NB: this step takes a while (but less than an hour)

# Baseline
anProgOTUsBL <- ancom2prog(subset_samples(progPhyTrim, Timepoint == "baseline"))
# Followup
anProgOTUsFU <- ancom2prog(subset_samples(progPhyTrim, Timepoint == "followup"))

# Genera

# Baseline
anProgGenBL <- ancom2prog(subset_samples(progPhyTrimGen, Timepoint == "baseline"))
```



```

#Followup
anProgGenFU <- ancom2prog(subset_samples(progPhyTrimGen, Timepoint == "followup"))

# Families

# Baseline
anProgFamBL <- ancom2prog(subset_samples(progPhyTrimFam, Timepoint == "baseline"))
#Followup
anProgFamFU <- ancom2prog(subset_samples(progPhyTrimFam, Timepoint == "followup"))

```

There are no hits at all on the genus and family levels, only a handful of OTUs for both timepoints. Collect the results (on the levels that had some):

## Table S6A

```

# Function for getting results if there are any (or just an empty data.frame if not):
checkAnRes <- function(ancom_out, lvl, tp){

  ancom_res <- getAnRes(ancom_out)

  if(length(ancom_res) == 0){
    res <- data.frame()
  } else {
    res <- data.frame(Taxon = ancom_res, Level = lvl, Timepoint = tp)
  }
  return(res)
}

anProgRes <- rbind(checkAnRes(anProgOTUsBL, lvl = "OTU", tp = "baseline"),
                  checkAnRes(anProgOTUsFU, lvl = "OTU", tp = "followup"),
                  checkAnRes(anProgGenBL, lvl = "genus", tp = "baseline"),
                  checkAnRes(anProgGenFU, lvl = "genus", tp = "followup"),
                  checkAnRes(anProgFamBL, lvl = "family", tp = "baseline"),
                  checkAnRes(anProgFamFU, lvl = "family", tp = "followup"))

# Table for exporting, with genus classification information for OTUs
anProgExp <- anProgRes
anProgExp$Taxon <- as.character(anProgExp$Taxon)
anProgExp[anProgExp$Level == "OTU", "Taxon"] <- gsub("_", " ", paste(anProgExp[anProgExp$Level ==
  "OTU", "Taxon"], " (", tax_table(progPhyTrim)[anProgExp[anProgExp$Level == "OTU", "Taxon"],
  "Genus"], ")"), sep = "")

kable_styling(kable(anProgExp), full_width = FALSE)

```

| Taxon                                  | Level | Timepoint |
|----------------------------------------|-------|-----------|
| Otu0148 (Bifidobacterium)              | OTU   | followup  |
| Otu0327 (Lachnospiraceae unclassified) | OTU   | followup  |

```

## Export
write.csv(anProgExp, "Outputs/table_s6a.csv")

```

## Random forests

Run separately for baseline and follow-up, not corrected for confounders.

```

# Function for random forest classifiers
rfProgCat <- function(phyloObj, rngseed, treen){
  predictors <- t(otu_table(phyloObj))
  response <- sample_data(phyloObj)$ProgCat
  rf.data <- data.frame(response, predictors)
}

```

```

set.seed(rngseed)
rfres <- rfPermute(response~., data = rf.data, ntree = treen, num.cores = 4)
return(rfres)
}

## Run comparisons:

## OTUs
rfOtusProgBL <- rfProgCat(subset_samples(progPhyTrim, Timepoint == "baseline"), 483029, 500)
rfSigOtusProgBL <- getRFsigs(rfOtusProgBL, "OTU")
rfSigOtusProgBL$Timepoint <- "baseline"

rfOtusProgFU <- rfProgCat(subset_samples(progPhyTrim, Timepoint == "followup"), 132118, 500)
rfSigOtusProgFU <- getRFsigs(rfOtusProgFU, "OTU")
rfSigOtusProgFU$Timepoint <- "followup"

# Genera
rfGenProgBL <- rfProgCat(subset_samples(progPhyTrimGen, Timepoint == "baseline"), 900097, 500)
rfSigGenProgBL <- getRFsigs(rfGenProgBL, "Genus")
rfSigGenProgBL$Timepoint <- "baseline"

rfGenProgFU <- rfProgCat(subset_samples(progPhyTrimGen, Timepoint == "followup"), 562913, 500)
rfSigGenProgFU <- getRFsigs(rfGenProgFU, "Genus")
rfSigGenProgFU$Timepoint <- "followup"

# Families
rfFamProgBL <- rfProgCat(subset_samples(progPhyTrimFam, Timepoint == "baseline"), 553580, 500)
rfSigFamProgBL <- getRFsigs(rfFamProgBL, "Family")
rfSigFamProgBL$Timepoint <- "baseline"

rfFamProgFU <- rfProgCat(subset_samples(progPhyTrimFam, Timepoint == "followup"), 526037, 500)
rfSigFamProgFU <- getRFsigs(rfFamProgFU, "Family")
rfSigFamProgFU$Timepoint <- "followup"

```

## Table S6B

Collect results and export (here showing only first 10 rows) :

```

rfProgRes <- rbind(rfSigOtusProgBL, rfSigOtusProgFU, rfSigGenProgBL,
                  rfSigGenProgFU, rfSigFamProgBL, rfSigFamProgFU)

# Trim to only significant results and reorganize for export
rfProgResultsExp <- subset(rfProgRes, MeanDecreaseGini.pval < 0.05)
rfProgResultsExp <- rfProgResultsExp[, c("Level", "Timepoint", "Taxon", "MeanDecreaseGini",
    "MeanDecreaseGini.pval")]
rfProgResultsExp <- rfProgResultsExp[order(rfProgResultsExp$Level, rfProgResultsExp$Timepoint,
    rfProgResultsExp$Taxon),]
rfProgResultsExp[rfProgResultsExp$Level == "OTU", "Taxon"] <- gsub("_", " ",
    paste(rfProgResultsExp[rfProgResultsExp$Level == "OTU", "Taxon"], " (",
    tax_table(progPhyTrim)[rfProgResultsExp[rfProgResultsExp$Level == "OTU", "Taxon"], "Genus"],
    ")", sep = ""))
rownames(rfProgResultsExp) <- NULL

kable_styling(kable(head(rfProgResultsExp, 10), digits = 4), font_size = 10, full_width = FALSE)

```

| Level  | Timepoint | Taxon              | MeanDecreaseGini | MeanDecreaseGini.pval |
|--------|-----------|--------------------|------------------|-----------------------|
| Family | baseline  | Eubacteriaceae     | 0.9975           | 0.0297                |
| Family | baseline  | Streptococcaceae   | 1.7012           | 0.0099                |
| Family | baseline  | Synergistaceae     | 0.8288           | 0.0495                |
| Family | followup  | Actinomycetaceae   | 1.3350           | 0.0297                |
| Family | followup  | Anaeroplasmataceae | 0.9584           | 0.0099                |
| Genus  | baseline  | Anaerotruncus      | 0.7630           | 0.0396                |
| Genus  | baseline  | Cloacibacillus     | 0.3297           | 0.0396                |
| Genus  | baseline  | Eubacterium        | 0.6376           | 0.0099                |
| Genus  | baseline  | Intestinimonas     | 0.7467           | 0.0297                |
| Genus  | followup  | Actinomyces        | 0.6551           | 0.0396                |

```
## Export
write.csv(rfProgResultsExp, "Outputs/table_s6b.csv")

# Reorder for downstream comparisons:
rfProgRes <- rfProgRes[, c("Taxon", "Level", "Timepoint", "MeanDecreaseGini.pval")]
colnames(rfProgRes)[4] <- "pval"
```

Estimate model significance:

```
# Estimating model significance
# (This is SLOOOOW)
rfModSigsProg <- rbind(
  getRFmodelSig(rfOtusProgBL, subset_samples(progPhyTrim, Timepoint == "baseline")),
  getRFmodelSig(rfOtusProgFU, subset_samples(progPhyTrim, Timepoint == "followup")),
  getRFmodelSig(rfGenProgBL, subset_samples(progPhyTrimGen, Timepoint == "baseline")),
  getRFmodelSig(rfGenProgFU, subset_samples(progPhyTrimGen, Timepoint == "followup")),
  getRFmodelSig(rfFamProgBL, subset_samples(progPhyTrimFam, Timepoint == "baseline")),
  getRFmodelSig(rfFamProgFU, subset_samples(progPhyTrimFam, Timepoint == "followup"))
)
```

Table of the model significance:

**Table S7**

```
colnames(rfModSigsProg) <- c("pValue", "realOOB", "permOOB")
rfModSigsProg <- as.data.frame(rfModSigsProg)
rfModSigsProg$Level <- rep(c("OTU", "Genus", "Family"), each = 2)
rfModSigsProg$Timepoint <- rep(c("baseline", "followup"), 3)

rfModSigsProg <- rfModSigsProg[, c("Level", "Timepoint", "realOOB", "permOOB", "pValue")]
rfModSigsProg <- rfModSigsProg[order(rfModSigsProg$Level), ]
rownames(rfModSigsProg) <- NULL

kable_styling(kable(rfModSigsProg, digits = 3), full_width = FALSE)
```

| Level  | Timepoint | realOOB | permOOB | pValue |
|--------|-----------|---------|---------|--------|
| Family | baseline  | 0.286   | 0.286   | 0.232  |
| Family | followup  | 0.321   | 0.286   | 0.798  |
| Genus  | baseline  | 0.304   | 0.286   | 0.660  |
| Genus  | followup  | 0.321   | 0.286   | 0.910  |
| OTU    | baseline  | 0.304   | 0.286   | 0.728  |
| OTU    | followup  | 0.268   | 0.286   | 0.044  |

```
## Export
write.csv(rfModSigsProg, "Outputs/table_s7.csv")
```

None of the models are better than chance at classifying the samples into progressed and stable.

## DESeq2

Timepoints run separately, correcting for COMT inhibitor medication.

```
library("DESeq2")

# Function for comparisons
dsProgTpCat <- function(phyloObj, baseline = TRUE){
  if(baseline == FALSE){
    ph0 <- subset_samples(phyloObj, Timepoint == "followup")
  } else {
    ph0 <- subset_samples(phyloObj, Timepoint == "baseline")
  }
  ds <- phyloseq_to_deseq2(ph0, ~ meds_COMT_inhibitor + ProgCat)
  ds <- DESeq(ds, fitType = "parametric", sfType = "poscounts")
```

```

dsres <- rbind(
  data.frame(cbind(as(results(ds, cooksCutoff = FALSE, name = "meds_COMT_inhibitor_1_vs_0"),
    "data.frame"), as(tax_table(ph0), "matrix")), Variable = "meds_COMT_inhibitor"),
  data.frame(cbind(as(results(ds, cooksCutoff = FALSE, name = "ProgCat_progressed_vs_stable"),
    "data.frame"), as(tax_table(ph0), "matrix")), Variable = "ProgCat_progressed_vs_stable"))
if(baseline == FALSE){
  dsres$Timepoint <- "followup"
} else {
  dsres$Timepoint <- "baseline"
}
return(dsres)
}

# Run comparisons

# OTUs
dsProgOtusBL <- dsProgTpCat(phyloObj = progPhyTrim, baseline = TRUE)
dsProgOtusFU <- dsProgTpCat(phyloObj = progPhyTrim, baseline = FALSE)

# Genera
dsProgGenBL <- dsProgTpCat(phyloObj = progPhyTrimGen, baseline = TRUE)
dsProgGenFU <- dsProgTpCat(phyloObj = progPhyTrimGen, baseline = FALSE)

# Families
dsProgFamBL <- dsProgTpCat(phyloObj = progPhyTrimFam, baseline = TRUE)
dsProgFamFU <- dsProgTpCat(phyloObj = progPhyTrimFam, baseline = FALSE)

# Collect results:
dsProgRes <- data.frame(rbind(dsProgOtusBL, dsProgOtusFU), Level = "OTU")
dsProgRes <- rbind(dsProgRes, data.frame(rbind(dsProgGenBL, dsProgGenFU), Level = "Genus"))
dsProgRes <- rbind(dsProgRes, data.frame(rbind(dsProgFamBL, dsProgFamFU), Genus = NA, Level =
  "Family"))

```

## Table S6C

Rearrange results data frame; export (here only showing first 10 rows):

```

# Reorganize table to have a single "Taxon" variable instead of full taxonomy:
dsProgRes[dsProgRes$Level == "Family", "Taxon"] <- as.character(dsProgRes[dsProgRes$Level ==
  "Family", "Family"])
dsProgRes[dsProgRes$Level == "Genus", "Taxon"] <- as.character(dsProgRes[dsProgRes$Level == "Genus",
  "Genus"])
dsProgRes[dsProgRes$Level == "OTU", "Taxon"] <- substr(rownames(dsProgRes[dsProgRes$Level ==
  "OTU",]), start = 1, stop = 7)
dsProgRes <- dsProgRes[, c("Level", "Timepoint", "Taxon", "Variable", "log2FoldChange", "lfcSE",
  "pvalue", "padj")]

# Results for exporting final table
dsProgExp <- subset(dsProgRes, padj < 0.05)
levels(dsProgExp$Variable) <- c("COMT inhibitor", "Progression")
dsProgExp$Variable <- factor(dsProgExp$Variable, levels = c("Progression", "COMT inhibitor"))
dsProgExp$Level <- factor(dsProgExp$Level, levels = c("Family", "Genus", "OTU"))
dsProgExp <- dsProgExp[order(dsProgExp$Level, dsProgExp$Timepoint, dsProgExp$Variable,
  dsProgExp$Taxon),]
rownames(dsProgExp) <- NULL

```

```
kable_styling(kable(head(dsProgExp, 10), digits = 4), font_size = 10, full_width = FALSE)
```

| Level  | Timepoint | Taxon                 | Variable       | log2FoldChange | lfcSE  | pvalue | padj   |
|--------|-----------|-----------------------|----------------|----------------|--------|--------|--------|
| Family | baseline  | Streptococcaceae      | Progression    | 2.2304         | 0.5388 | 0.0000 | 0.0013 |
| Family | baseline  | Enterococcaceae       | COMT inhibitor | 14.6724        | 4.6902 | 0.0018 | 0.0351 |
| Family | baseline  | Peptostreptococcaceae | COMT inhibitor | -2.9684        | 0.9556 | 0.0019 | 0.0351 |
| Family | followup  | Anaeroplasmataceae    | Progression    | 7.5962         | 1.3797 | 0.0000 | 0.0000 |

| Level  | Timepoint | Taxon               | Variable       | log2FoldChange | lfcSE  | pvalue | padj   |
|--------|-----------|---------------------|----------------|----------------|--------|--------|--------|
| Family | followup  | Oxalobacteraceae    | Progression    | -2.7586        | 0.9027 | 0.0022 | 0.0277 |
| Family | followup  | Prevotellaceae      | Progression    | -4.8780        | 1.0187 | 0.0000 | 0.0000 |
| Family | followup  | Verrucomicrobiaceae | Progression    | -2.2722        | 0.7763 | 0.0034 | 0.0316 |
| Family | followup  | Lachnospiraceae     | COMT inhibitor | -1.5118        | 0.3315 | 0.0000 | 0.0001 |
| Family | followup  | Lactobacillaceae    | COMT inhibitor | 6.2970         | 0.9224 | 0.0000 | 0.0000 |
| Family | followup  | Ruminococcaceae     | COMT inhibitor | -1.0925        | 0.2406 | 0.0000 | 0.0001 |

```
## Export
write.csv(dsProgExp, "Outputs/table_s6c.csv")

# Trim results for downstream analyses
dsProgRes <- dsProgRes[, c("Taxon", "Level", "Timepoint", "padj", "Variable")]
```

## Compare and contrast results

Find out if there are any overlapping taxa between methods and/or timepoints for the progression variable:

```
source("Inputs/taxaSummarizer.R") # function for making summaries of relative abundances

# Additional fixes to the DS2 results:
dsProgRes <- subset(dsProgRes, Variable == "ProgCat_progressed_vs_stable")
dsProgRes$Variable <- NULL
colnames(dsProgRes)[4] <- "pval"

# Combine results from the three methods:
progResAll <- rbind(data.frame(anProgRes, pval = 0, Method = "ANCOM"),
  data.frame(rfProgRes, Method = "RF"),
  data.frame(dsProgRes, Method = "DS2"))
rownames(progResAll) <- NULL

# Dataframe with only significant taxa:
progResAllSigs <- subset(progResAll, pval < 0.05)

## Are there any overlapping taxa between methods?

# Baseline
blProgShared <- names(which(table(c(
  as.character(subset(progResAllSigs, Method == "ANCOM" & Timepoint == "baseline")$Taxon),
  as.character(subset(progResAllSigs, Method == "RF" & Timepoint == "baseline")$Taxon),
  as.character(subset(progResAllSigs, Method == "DS2" & Timepoint == "baseline")$Taxon))) > 1))
blProgShared
```

```
## [1] "Otu0111" "Streptococcaceae"
```

```
# Followup
fuProgShared <- names(which(table(c(
  as.character(subset(progResAllSigs, Method == "ANCOM" & Timepoint == "followup")$Taxon),
  as.character(subset(progResAllSigs, Method == "RF" & Timepoint == "followup")$Taxon),
  as.character(subset(progResAllSigs, Method == "DS2" & Timepoint == "followup")$Taxon))) > 1))
fuProgShared
```

```
## [1] "Anaeroplasmataceae" "Asteroleplasma" "Otu0084"
## [4] "Otu0115" "Otu0148" "Otu0241"
## [7] "Otu0327"
```

```
# Any of these also shared between timepoints?
intersect(blProgShared, fuProgShared)
```

```
## character(0)
```

```
# No!
```

```
# Are there overall any significant taxa shared between timepoints?  
# (detected as significant with at least one method)
```

```
tpProgShared <- names(which(table(c(  
  unique(as.character(subset(progResAllSigs, Timepoint == "baseline")$Taxon)),  
  unique(as.character(subset(progResAllSigs, Timepoint == "followup")$Taxon)))) > 1))  
tpProgShared
```

```
## [1] "Otu0042" "Otu0049" "Otu0115" "Otu0118" "Otu0166"  
## [6] "Otu0222" "Otu0268" "Otu0327" "Prevotella"
```

```
progSharedTaxa <- sort(unique(c(blProgShared, fuProgShared, tpProgShared)))
```

Make a table of the taxa that are significant at either timepoint according to more than one tool, or at both timepoints according to at least one tool.

```
# Collect the overlapping taxa into a dataframe
```

```
progSharedSigs <- subset(progResAll, progResAll$Taxon %in% progSharedTaxa)  
progSharedSigs <- dcast(progSharedSigs, Taxon + Level ~ Timepoint + Method, value.var = "pval")
```

```
progSharedSigs[!is.na(progSharedSigs$baseline_ANCOM), "baseline_ANCOM"] <- "significant"  
progSharedSigs[!is.na(progSharedSigs$followup_ANCOM), "followup_ANCOM"] <- "significant"  
progSharedSigs[is.na(progSharedSigs$baseline_ANCOM), "baseline_ANCOM"] <- "n.s."  
progSharedSigs[is.na(progSharedSigs$followup_ANCOM), "followup_ANCOM"] <- "n.s."
```

```
progSharedSigs$Level <- factor(progSharedSigs$Level, levels = c("Family", "Genus", "OTU"))  
progSharedSigs <- progSharedSigs[order(progSharedSigs$Level, progSharedSigs$Taxon),]
```

```
# Add mean relative abundances
```

```
progSharedSigs$Taxon <- as.character(progSharedSigs$Taxon)
```

```
progSharedSigsExp <- cbind(progSharedSigs, rbind(  
  groupMeanSD(progPhyFam, subset(progSharedSigs, Level == "Family")$Taxon, "ProgTP"),  
  groupMeanSD(progPhyGen, subset(progSharedSigs, Level == "Genus")$Taxon, "ProgTP"),  
  groupMeanSD(progPhy, subset(progSharedSigs, Level == "OTU")$Taxon, "ProgTP"))
```

```
# Delete redundant second Taxon column
```

```
progSharedSigsExp[, grep("Taxon", colnames(progSharedSigsExp))[2]] <- NULL
```

```
# Mark taxa with overlap between methods
```

```
progSharedSigsExp$MethodOverlap <- progSharedSigsExp$Taxon %in% unique(c(blProgShared, fuProgShared))
```

```
# Mark taxa with overlap between timepoints
```

```
progSharedSigsExp$TimepointOverlap <- progSharedSigsExp$Taxon %in% tpProgShared
```

```
# Add genus classifications for OTUs
```

```
progSharedSigsExp[progSharedSigsExp$Level == "OTU", "Taxon"] <- gsub("_", " ",  
  paste(progSharedSigsExp[progSharedSigsExp$Level == "OTU", "Taxon"],  
  tax_table(progPhy)[progSharedSigsExp[progSharedSigsExp$Level == "OTU", "Taxon"], "Genus"]))
```

```
# Reorder
```

```
progSharedSigsExp <- progSharedSigsExp[, c("Taxon", "Level", "MethodOverlap", "TimepointOverlap",  
  "MeanSD stable_baseline", "MeanSD progressed_baseline", "baseline_ANCOM", "baseline_RF",  
  "baseline_DS2", "MeanSD stable_followup", "MeanSD progressed_followup", "followup_ANCOM",  
  "followup_RF", "followup_DS2")]
```

```
rownames(progSharedSigsExp) <- progSharedSigsExp$Taxon
```

```
progSharedSigsExp$Taxon <- NULL
```

## Table 9

Export table:

# Baseline results

```
kable(progSharedSigsExp[, 1:8], digits = 4, col.names = c("Level", "Method Overlap", "Timepoint Overlap", "MeanSD stable baseline", "MeanSD progressed baseline", "p_ANCOM baseline", "p_RF baseline", "p_DS2 baseline"))
```

| Level                                | Method Overlap | Timepoint Overlap | MeanSD stable baseline | MeanSD progressed baseline | p_-ANCOM baseline | p_RF baseline | p_DS2 baseline |
|--------------------------------------|----------------|-------------------|------------------------|----------------------------|-------------------|---------------|----------------|
| Streptococcaceae Family              | TRUE           | FALSE             | 0.207 ± 0.584          | 0.614 ± 1.316              | n.s.              | 0.0099        | 0.0013         |
| Anaeroplasmataceae Family            | TRUE           | FALSE             | 0.426 ± 1.792          | 0.371 ± 1.125              | n.s.              | 0.1980        | 0.9661         |
| Prevotella Genus                     | FALSE          | TRUE              | 0.964 ± 2.571          | 0.147 ± 0.493              | n.s.              | 0.5545        | 0.0000         |
| Asteroleplasma Genus                 | TRUE           | FALSE             | 0.191 ± 1.022          | 0.302 ± 1.113              | n.s.              | 0.4554        | 0.7673         |
| Otu0148 Bifidobacterium              | TRUE           | FALSE             | 0.06 ± 0.252           | 0.143 ± 0.498              | n.s.              | 0.4653        | 0.8621         |
| Otu0327 Lachnospiraceae unclassified | TRUE           | TRUE              | 0.013 ± 0.032          | 0.104 ± 0.282              | n.s.              | 0.0495        | 0.9651         |
| Otu0118 Ruminococcaceae unclassified | FALSE          | TRUE              | 0.084 ± 0.102          | 0.246 ± 0.221              | n.s.              | 0.0099        | 0.0944         |
| Otu0166 Ruminococcaceae unclassified | FALSE          | TRUE              | 0.069 ± 0.102          | 0.166 ± 0.203              | n.s.              | 0.0198        | 0.5306         |
| Otu0222 Phascolarctobacterium        | FALSE          | TRUE              | 0.091 ± 0.281          | 0 ± 0                      | n.s.              | 0.4356        | 0.0018         |
| Otu0111 Streptococcus                | TRUE           | FALSE             | 0.127 ± 0.369          | 0.46 ± 1.187               | n.s.              | 0.0495        | 0.0069         |
| Otu0042 Coprococcus                  | FALSE          | TRUE              | 0.344 ± 1.26           | 0.002 ± 0.002              | n.s.              | 0.7327        | 0.0003         |
| Otu0268 Desulfovibrio                | FALSE          | TRUE              | 0.059 ± 0.168          | 0.034 ± 0.131              | n.s.              | 0.4752        | 0.0000         |
| Otu0115 Lachnospiraceae unclassified | TRUE           | TRUE              | 0.167 ± 0.404          | 0.607 ± 2.296              | n.s.              | 0.9208        | 0.0185         |
| Otu0049 Ruminococcaceae unclassified | FALSE          | TRUE              | 0.26 ± 0.707           | 0.595 ± 0.919              | n.s.              | 0.0396        | 0.8639         |
| Otu0241 Clostridiales unclassified   | TRUE           | FALSE             | 0.029 ± 0.054          | 0.044 ± 0.064              | n.s.              | 0.4455        | 0.6979         |
| Otu0084 Clostridium IV               | TRUE           | FALSE             | 0.313 ± 0.978          | 0.335 ± 0.726              | n.s.              | 0.4851        | 0.8639         |

# Follow-up results

```
kable(progSharedSigsExp[, 9:ncol(progSharedSigsExp)], digits = 4, col.names = c("MeanSD stable followup", "MeanSD progressed followup", "p_ANCOM followup", "p_RF followup", "p_DS2 followup"))
```

|                    | MeanSD stable followup | MeanSD progressed followup | p_ANCOM followup | p_RF followup | p_DS2 followup |
|--------------------|------------------------|----------------------------|------------------|---------------|----------------|
| Streptococcaceae   | 0.299 ± 0.904          | 0.398 ± 0.74               | n.s.             | 0.6634        | 0.1764         |
| Anaeroplasmataceae | 0.133 ± 0.596          | 0.311 ± 1.05               | n.s.             | 0.0099        | 0.0000         |



|                                                                       | MeanSD stable<br>followup | MeanSD progressed<br>followup | p_ANCOM<br>followup | p_RF followup | p_DS2 followup |
|-----------------------------------------------------------------------|---------------------------|-------------------------------|---------------------|---------------|----------------|
| Prevotella                                                            | 1.966 ± 4.04              | 0.187 ± 0.678                 | n.s.                | 0.3861        | 0.0000         |
| Asteroleplasma                                                        | 0.133 ± 0.596             | 0.31 ± 1.051                  | n.s.                | 0.0495        | 0.0000         |
| Otu0148                                                               | 0.051 ± 0.125             | 0.744 ± 1.324                 | significant         | 0.0099        | 0.3298         |
| Bifidobacterium<br>Otu0327                                            | 0.021 ± 0.091             | 0.178 ± 0.357                 | significant         | 0.0099        | 0.0157         |
| Lachnospiraceae<br>unclassified<br>Otu0118                            | 0.135 ± 0.261             | 0.165 ± 0.14                  | n.s.                | 0.0396        | 0.8383         |
| Ruminococcaceae<br>unclassified<br>Otu0166                            | 0.082 ± 0.097             | 0.194 ± 0.227                 | n.s.                | 0.0396        | 0.6027         |
| Ruminococcaceae<br>unclassified<br>Otu0222 Phasco-<br>larctobacterium | 0.043 ± 0.137             | 0 ± 0                         | n.s.                | 0.9109        | 0.0000         |
| Otu0111                                                               | 0.217 ± 0.643             | 0.254 ± 0.501                 | n.s.                | 0.7426        | 0.4380         |
| Streptococcus<br>Otu0042                                              | 0.511 ± 1.44              | 0.004 ± 0.011                 | n.s.                | 0.5248        | 0.0000         |
| Coproccoccus<br>Otu0268                                               | 0.042 ± 0.102             | 0.001 ± 0.002                 | n.s.                | 0.7921        | 0.0093         |
| Desulfovibrio<br>Otu0115                                              | 0.04 ± 0.086              | 0.776 ± 2.121                 | n.s.                | 0.0099        | 0.0143         |
| Lachnospiraceae<br>unclassified<br>Otu0049                            | 0.286 ± 0.663             | 0.56 ± 0.896                  | n.s.                | 0.0297        | 0.2972         |
| Ruminococcaceae<br>unclassified<br>Otu0241                            | 0.015 ± 0.022             | 0.084 ± 0.159                 | n.s.                | 0.0396        | 0.0200         |
| Clostridiales<br>unclassified<br>Otu0084                              | 0.071 ± 0.091             | 0.275 ± 0.345                 | n.s.                | 0.0099        | 0.0006         |
| Clostridium IV                                                        |                           |                               |                     |               |                |

```
## Export
write.csv(progSharedSigsExp, "Outputs/table_9.csv")
```

Make plots of all overlapping genera and families (either method or timepoint overlap), and the family *Prevotellaceae*, which is a taxon of interest and was significant with DESeq2 at follow-up (but not at baseline).

Figure 11

```
# Plotting function
progDiffBoxPlot <- function(df, taxon){
  p <- ggplot(df, aes(y = df[[taxon]], x = ProgCat, shape = ProgCat)) +
    geom_boxplot(width = 0.2, outlier.shape = NA) +
    geom_jitter(width = 0.2, alpha = 0.6, size = 1) +
    theme_bw() +
  xlab(NULL) +
  ggtitle(taxon) +
  facet_grid(~Timepoint) +
  scale_fill_manual(values = c("gray95", "gray10")) +
  scale_x_discrete(labels = c("stable", "progressed")) +
  ylab("Relative abundance (%)") +
  theme(legend.position = "none",
        panel.grid = element_blank(),
        axis.text.x = element_text(color = "black"),
        plot.title = element_text(size = 10, face = "italic"))
  return(p)
}

progSharedGen <- progSharedTaxa[-c(grep("Otu", progSharedTaxa), grep("ceae", progSharedTaxa))]

progSharedFam <- c(grep("ceae", progSharedTaxa[-grep("Otu", progSharedTaxa)], value = TRUE),
  "Prevotellaceae")

# Make table with relative abundances
progAbunds <- data.frame(row.names = rownames(sample_data(progPhy)))
progAbunds[, progSharedGen] <- t(prop.table(otu_table(progPhyGen), 2) * 100)[, progSharedGen]
progAbunds[, progSharedFam] <- t(prop.table(otu_table(progPhyFam), 2) * 100)[, progSharedFam]
```



```
# Add metadata
progAbunds$ProgCat <- sample_data(progPhy)$ProgCat
progAbunds$Timepoint <- sample_data(progPhy)$Timepoint
levels(progAbunds$Timepoint) <- c("Baseline", "Follow-up")

progSharedSort <- sort(c(progSharedGen, progSharedFam))
progSharedSort
```

```
## [1] "Anaeroplasmataceae" "Asteroleplasma"      "Prevotella"
## [4] "Prevotellaceae"      "Streptococcaceae"
```

```
# Plot taxa
progPlots <- lapply(progSharedSort, function(x) progDiffBoxPlot(progAbunds, x))
progPlotsGrobs <- do.call("arrangeGrob", progPlots)

grid.arrange(progPlotsGrobs)
```

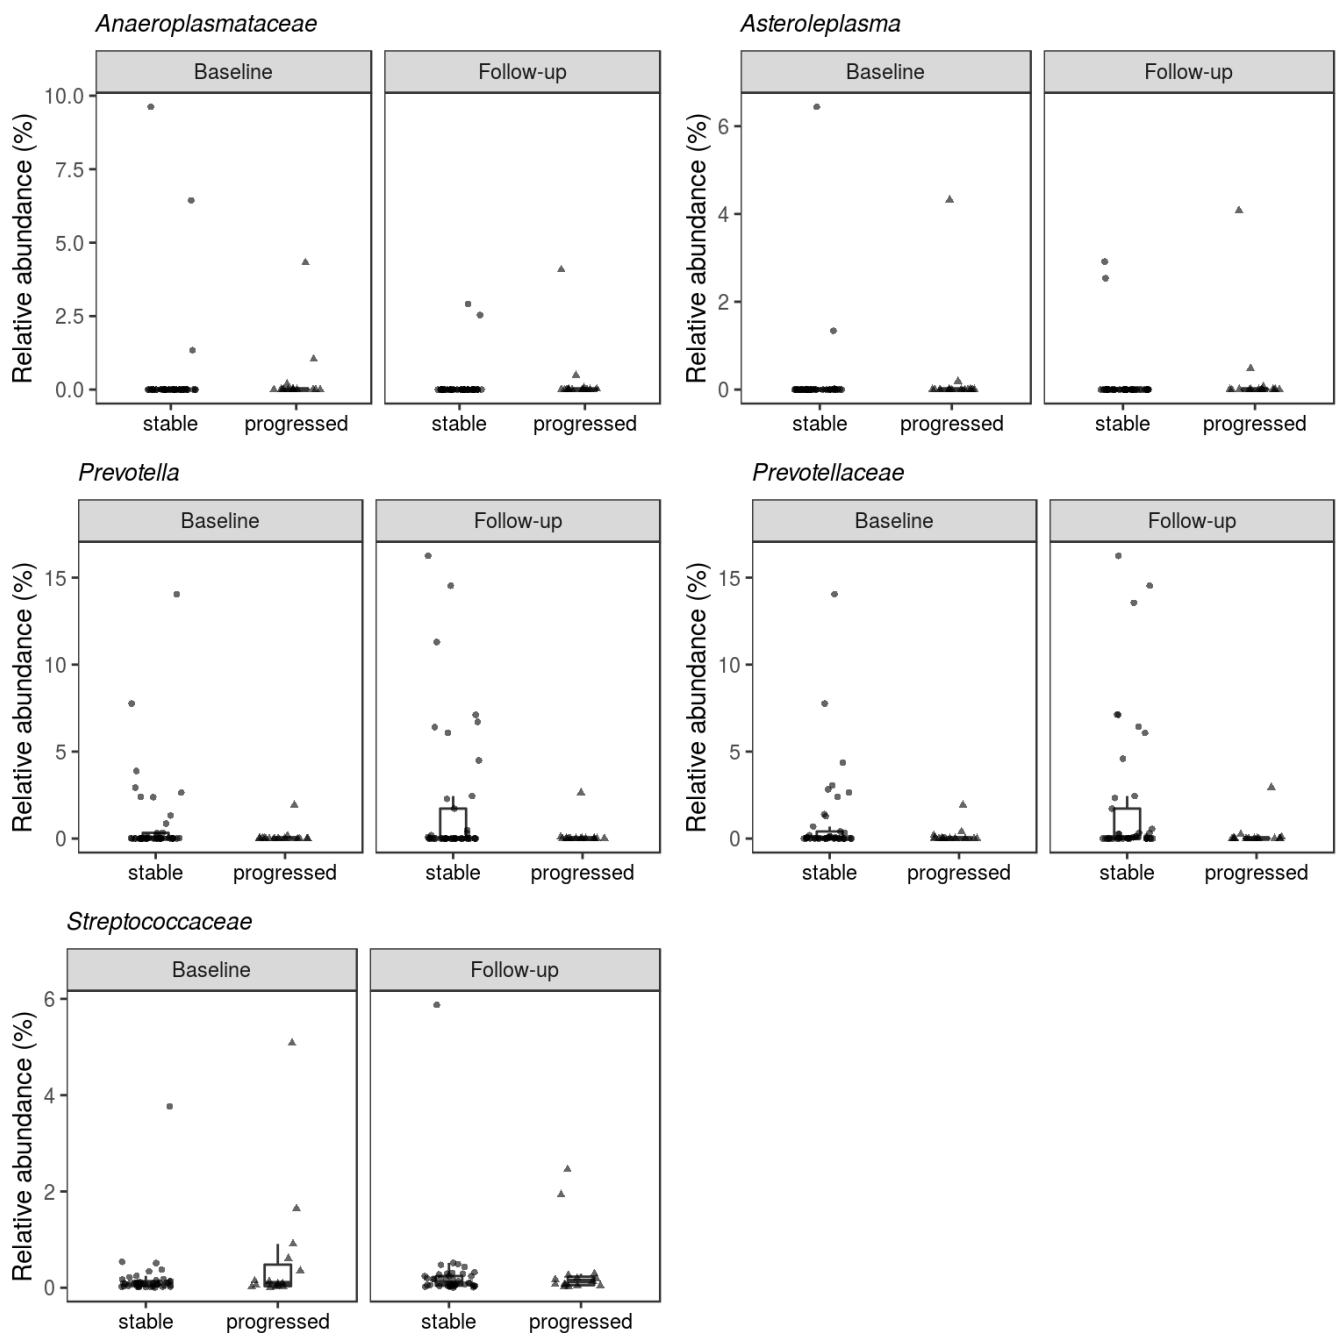

```
## Export to pdf
ggsave(progPlotsGrobs, filename = "Outputs/figure11.pdf", device = cairo_pdf,
```

```
width = fullpage, height = maxhi*0.7, units = "in")
```

## PD phenotypes (TD vs PIGD)

### Data setup

Trim to taxa present in at least 1/10 samples, and remove the “unclassified” bin.

```
nrow(sample_data(progPhyPhe)) / 10 # 10.4
```

```
## [1] 10.4
```

```
trim_co3 <- round(nrow(sample_data(progPhyPhe)) / 10)
```

```
progPhyPhe0 <- filter_taxa(progPhyPhe, function(x) sum(x > 1) > trim_co3 & sum(x) > 999, prune = TRUE)
```

```
progPhyPheG <- filter_taxa(collapseTaxLevel(progPhyPhe, level = "Genus", fixUnclassifieds = FALSE), function(x) sum(x > 1) > trim_co3, prune = TRUE)
```

```
progPhyPheG <- subset_taxa(progPhyPheG, Genus != "unclassified")
```

```
progPhyPheF <- filter_taxa(collapseTaxLevel(progPhyPhe, level = "Family", fixUnclassifieds = FALSE), function(x) sum(x > 1) > trim_co3, prune = TRUE)
```

```
progPhyPheF <- subset_taxa(progPhyPheF, Family != "unclassified")
```

### ANCOM

Compare TD vs PIGD with ANCOM (not correcting for any confounders):

```
# Function for comparisons:
```

```
ancom2JanCat <- function(phyloObj, adjp = 2){  
  otu_data <- data.frame(Sample.ID = sample_data(phyloObj)$Subject,  
    as.data.frame(as.matrix(t(otu_table(phyloObj))))))  
  meta_data <- data.frame(Sample.ID = sample_data(phyloObj)$Subject,  
    JankovicClass = sample_data(phyloObj)$JankovicClass)  
  res <- ANCOM.main(OTUdat = otu_data,  
    Vardat = meta_data,  
    adjusted = FALSE,  
    repeated = FALSE,  
    main.var = "JankovicClass",  
    adj.formula = NULL,  
    repeat.var = NULL,  
    longitudinal = FALSE,  
    random.formula = NULL,  
    multcorr = adjp,  
    sig = 0.05,  
    prev.cut = 0.90)  
  return(res)  
}
```

```
# OTUs
```

```
# NB: Takes some time to finish!
```

```
anPheOtuBL<-ancom2JanCat(subset_samples(progPhyPhe0, Timepoint == "baseline"))
```

```
anPheOtuFU<-ancom2JanCat(subset_samples(progPhyPhe0, Timepoint == "followup"))
```

```
# Genera
```

```
anPheGenBL <- ancom2JanCat(subset_samples(progPhyPheG, Timepoint == "baseline"))
```

```
anPheGenFU <- ancom2JanCat(subset_samples(progPhyPheG, Timepoint == "followup"))
```

```
# Families
```

```
anPheFamBL <- ancom2JanCat(subset_samples(progPhyPheF, Timepoint == "baseline"))
```

```
anPheFamFU <- ancom2JanCat(subset_samples(progPhyPheF, Timepoint == "followup"))
```

Collect the results, which were exported as Supplementary table 3A.

**Table S8A**

```
# Any hits found?
anJanOTUs <- rbind(checkAnRes(anPheOtuBL, lvl = "OTU", tp = "baseline"),
                  checkAnRes(anPheOtuFU, lvl = "OTU", tp = "followup"),
                  checkAnRes(anPheGenBL, lvl = "genus", tp = "baseline"),
                  checkAnRes(anPheGenFU, lvl = "genus", tp = "followup"),
                  checkAnRes(anPheFamBL, lvl = "family", tp = "baseline"),
                  checkAnRes(anPheFamFU, lvl = "family", tp = "followup"))

kable_styling(kable(anJanOTUs), full_width = FALSE)
```

| Taxon   | Level | Timepoint |
|---------|-------|-----------|
| Otu0048 | OTU   | baseline  |
| Otu0170 | OTU   | baseline  |

```
## Export
write.csv(anJanOTUs, "Outputs/table_s8a.csv")
```

Only two OTUs for baseline, nothing for follow-up. No genera or families at either level.

## DESeq2

```
# Testing function
dsJanTpCat <- function(phyloObj, baseline = TRUE){
  if(baseline == FALSE){
    ph0 <- subset_samples(phyloObj, Timepoint == "followup")
  } else {
    ph0 <- subset_samples(phyloObj, Timepoint == "baseline")
  }
  ds <- phyloseq_to_deseq2(ph0, ~ JankovicClass)
  ds <- DESeq(ds, fitType = "parametric", sfType = "poscounts")
  dsres<-cbind(as.data.frame(results(ds, cooksCutoff = FALSE, name = "JankovicClass_TD_vs_PIGD")),
              as.matrix(tax_table(ph0)))
  if(baseline == FALSE){
    dsres$Timepoint <- "followup"
  } else {
    dsres$Timepoint <- "baseline"
  }
  return(dsres)
}

# Run comparisons

# OTUs
dsJanOtusBL <- dsJanTpCat(phyloObj=progPhyPhe0, baseline = TRUE)
dsJanOtusFU <- dsJanTpCat(phyloObj=progPhyPhe0, baseline = FALSE)

# Genera
dsJanGenBL <- dsJanTpCat(phyloObj = progPhyPheG, baseline = TRUE)
dsJanGenFU <- dsJanTpCat(phyloObj = progPhyPheG, baseline = FALSE)

# Families
dsJanFamBL <- dsJanTpCat(phyloObj = progPhyPheF, baseline = TRUE)
dsJanFamFU <- dsJanTpCat(phyloObj = progPhyPheF, baseline = FALSE)
```

**Table S8B**

Collect the results and export (here showing only first 10 rows).

```
# Collect results
dsJanRes <- rbind(data.frame(rbind(dsJanOtuBL, dsJanOtuFU), Level = "OTU"),
  data.frame(rbind(dsJanGenBL, dsJanGenFU), Level = "Genus"),
  data.frame(rbind(dsJanFamBL, dsJanFamFU), Genus = NA, Level = "Family"))

dsJanResSigs <- subset(dsJanRes, padj < 0.05)

dsJanResSigs[dsJanResSigs$Level == "Family", "Taxon"] <-
  as.character(dsJanResSigs[dsJanResSigs$Level == "Family", "Family"])
dsJanResSigs[dsJanResSigs$Level == "Genus", "Taxon"] <- as.character(dsJanResSigs[dsJanResSigs$Level
  == "Genus", "Genus"])
dsJanResSigs[dsJanResSigs$Level == "OTU", "Taxon"] <-
  substr(rownames(dsJanResSigs[dsJanResSigs$Level == "OTU",]), start = 1, stop = 7)
dsJanResSigs[dsJanResSigs$Level == "OTU", "Taxon"] <- paste(dsJanResSigs[dsJanResSigs$Level ==
  "OTU", "Taxon"], " (" , gsub("_", " ", tax_table(progPhyPhe)[dsJanResSigs[dsJanResSigs$Level ==
  "OTU", "Taxon"], "Genus"])), ")", sep = "")

dsJanResSigs <- dsJanResSigs[, c("Level", "Timepoint", "Taxon", "log2FoldChange", "lfcSE", "pvalue",
  "padj")]
```

```
kable_styling(kable(head(dsJanResSigs, 10), digits = 4), font_size = 10, full_width = FALSE)
```

|         | Level | Timepoint | Taxon                                        | log2FoldChange | lfcSE  | pvalue | padj   |
|---------|-------|-----------|----------------------------------------------|----------------|--------|--------|--------|
| Otu0012 | OTU   | baseline  | Otu0012                                      | 1.8238         | 0.5327 | 0.0006 | 0.0246 |
| Otu0019 | OTU   | baseline  | (Bacteroides)<br>Otu0019                     | -3.0993        | 0.8683 | 0.0004 | 0.0160 |
| Otu0031 | OTU   | baseline  | (Prevotella)<br>Otu0031                      | -2.6344        | 0.7969 | 0.0009 | 0.0273 |
| Otu0047 | OTU   | baseline  | (Escherichia/Shigella)<br>Otu0047            | 4.5339         | 1.0628 | 0.0000 | 0.0024 |
| Otu0063 | OTU   | baseline  | (Butyrivibrio)<br>Otu0063 (Acidaminococ-     | 6.4045         | 1.7359 | 0.0002 | 0.0134 |
| Otu0082 | OTU   | baseline  | caceae<br>unclassified)<br>Otu0082 (As-      | -5.5362        | 1.6691 | 0.0009 | 0.0273 |
| Otu0093 | OTU   | baseline  | teroleplasma)<br>Otu0093                     | 6.3962         | 1.2701 | 0.0000 | 0.0001 |
| Otu0115 | OTU   | baseline  | (Clostridiales<br>unclassified)<br>Otu0115   | 5.4087         | 0.9346 | 0.0000 | 0.0000 |
| Otu0178 | OTU   | baseline  | (Lachnospiraceae<br>unclassified)<br>Otu0178 | 7.0462         | 1.8853 | 0.0002 | 0.0133 |
| Otu0197 | OTU   | baseline  | (Bacteria<br>unclassified)<br>Otu0197        | -3.6637        | 1.1336 | 0.0012 | 0.0314 |
|         |       |           | (Deltaproteobacteria<br>unclassified)        |                |        |        |        |

```
## Export
write.csv(dsJanResSigs, "Outputs/table_s8b.csv")
```

## Session info

The R packages and their specific versions used for these analyses were the following:

```
devtools::session_info()
```

```
## Session info
## setting value
## version R version 3.5.1 (2018-07-02)
## os Ubuntu 16.04.5 LTS
```

```

## system x86_64, linux-gnu
## ui X11
## language en_GB.utf8:
## collate en_GB.UTF-8
## ctype en_GB.UTF-8
## tz Europe/Helsinki
## date 2019-01-15
##
## Packages
## package * version date lib source
## abind 1.4-5 2016-07-21 [1] CRAN (R 3.5.1)
## acepack 1.4.1 2016-10-29 [1] CRAN (R 3.5.1)
## ade4 1.7-13 2018-08-31 [1] CRAN (R 3.5.1)
## annotate 1.60.0 2018-10-30 [1] Bioconductor
## AnnotationDbi 1.44.0 2018-10-30 [1] Bioconductor
## ape 5.2 2018-09-24 [1] CRAN (R 3.5.1)
## assertthat 0.2.0 2017-04-11 [1] CRAN (R 3.5.1)
## backports 1.1.2 2017-12-13 [1] CRAN (R 3.5.1)
## base64enc 0.1-3 2015-07-28 [1] CRAN (R 3.5.1)
## bindr 0.1.1 2018-03-13 [1] CRAN (R 3.5.1)
## bindrcpp 0.2.2 2018-03-29 [1] CRAN (R 3.5.1)
## Biobase * 2.42.0 2018-10-30 [1] Bioconductor
## BiocGenerics * 0.28.0 2018-10-30 [1] Bioconductor
## BiocParallel * 1.16.2 2018-11-28 [1] Bioconductor
## biomformat 1.10.0 2018-10-30 [1] Bioconductor
## Biostrings 2.50.1 2018-11-06 [1] Bioconductor
## bit 1.1-14 2018-05-29 [1] CRAN (R 3.5.1)
## bit64 0.9-7 2017-05-08 [1] CRAN (R 3.5.1)
## bitops 1.0-6 2013-08-17 [1] CRAN (R 3.5.1)
## blob 1.1.1 2018-03-25 [1] CRAN (R 3.5.1)
## callr 3.0.0 2018-08-24 [1] CRAN (R 3.5.1)
## checkmate 1.8.5 2017-10-24 [1] CRAN (R 3.5.1)
## class 7.3-14 2015-08-30 [4] CRAN (R 3.5.0)
## cli 1.0.1 2018-09-25 [1] CRAN (R 3.5.1)
## cluster 2.0.7-1 2018-04-09 [4] CRAN (R 3.5.0)
## codetools 0.2-15 2016-10-05 [1] CRAN (R 3.5.1)
## colorspace 1.3-2 2016-12-14 [1] CRAN (R 3.5.1)
## crayon 1.3.4 2017-09-16 [1] CRAN (R 3.5.1)
## data.table 1.11.8 2018-09-30 [1] CRAN (R 3.5.1)
## DBI 1.0.0 2018-05-02 [1] CRAN (R 3.5.1)
## DelayedArray * 0.8.0 2018-10-30 [1] Bioconductor
## deldir 0.1-15 2018-04-01 [1] CRAN (R 3.5.1)
## desc 1.2.0 2018-05-01 [1] CRAN (R 3.5.1)
## DESeq2 * 1.22.1 2018-11-05 [1] Bioconductor
## devtools * 2.0.1 2018-10-26 [1] CRAN (R 3.5.1)
## digest 0.6.18 2018-10-10 [1] CRAN (R 3.5.1)
## dplyr 0.7.8 2018-11-10 [1] CRAN (R 3.5.1)
## e1071 * 1.7-0 2018-07-28 [1] CRAN (R 3.5.1)
## eulerr * 5.0.0 2018-11-05 [1] CRAN (R 3.5.1)
## evaluate 0.12 2018-10-09 [1] CRAN (R 3.5.1)
## exactRankTests * 0.8-29 2017-03-01 [1] CRAN (R 3.5.1)
## factoextra * 1.0.5 2017-08-22 [1] CRAN (R 3.5.1)
## foreach 1.4.4 2017-12-12 [1] CRAN (R 3.5.1)
## foreign 0.8-71 2018-07-20 [4] CRAN (R 3.5.1)
## Formula 1.2-3 2018-05-03 [1] CRAN (R 3.5.1)
## fs 1.2.6 2018-08-23 [1] CRAN (R 3.5.1)
## genefilter 1.64.0 2018-10-30 [1] Bioconductor
## geneplotter 1.60.0 2018-10-30 [1] Bioconductor
## GenomeInfoDb * 1.18.1 2018-11-12 [1] Bioconductor
## GenomeInfoDbData 1.2.0 2018-12-04 [1] Bioconductor
## GenomicRanges * 1.34.0 2018-10-30 [1] Bioconductor
## ggfortify * 0.4.5 2018-05-26 [1] CRAN (R 3.5.1)

```

```

## ggplot2          * 3.1.0      2018-10-25 [1] CRAN (R 3.5.1)
## ggpubr           0.2         2018-11-15 [1] CRAN (R 3.5.1)
## ggrepel          0.8.0      2018-05-09 [1] CRAN (R 3.5.1)
## glue             1.3.0      2018-07-17 [1] CRAN (R 3.5.1)
## goftest          1.1-1      2017-04-03 [1] CRAN (R 3.5.1)
## gridExtra        * 2.3         2017-09-09 [1] CRAN (R 3.5.1)
## gtable           0.2.0      2016-02-26 [1] CRAN (R 3.5.1)
## highr            0.7         2018-06-09 [1] CRAN (R 3.5.1)
## Hmisc            4.1-1      2018-01-03 [1] CRAN (R 3.5.1)
## hms              0.4.2      2018-03-10 [1] CRAN (R 3.5.1)
## htmlTable        1.12        2018-05-26 [1] CRAN (R 3.5.1)
## htmltools        0.3.6      2017-04-28 [1] CRAN (R 3.5.1)
## htmlwidgets      1.3         2018-09-30 [1] CRAN (R 3.5.1)
## httr             1.3.1      2017-08-20 [1] CRAN (R 3.5.1)
## igraph           1.2.2      2018-07-27 [1] CRAN (R 3.5.1)
## IRanges          * 2.16.0     2018-10-30 [1] Bioconductor
## iterators        1.0.10     2018-07-13 [1] CRAN (R 3.5.1)
## jsonlite         1.5         2017-06-01 [1] CRAN (R 3.5.1)
## kableExtra       * 0.9.0      2018-05-21 [1] CRAN (R 3.5.1)
## knitr            * 1.20       2018-02-20 [1] CRAN (R 3.5.1)
## labeling         0.3         2014-08-23 [1] CRAN (R 3.5.1)
## lattice          * 0.20-38    2018-11-04 [1] CRAN (R 3.5.1)
## latticeExtra     0.6-28     2016-02-09 [1] CRAN (R 3.5.1)
## lazyeval         0.2.1      2017-10-29 [1] CRAN (R 3.5.1)
## locfit           1.5-9.1    2013-04-20 [1] CRAN (R 3.5.1)
## magrittr         1.5         2014-11-22 [1] CRAN (R 3.5.1)
## mapdata          2.3.0      2018-03-30 [1] CRAN (R 3.5.1)
## maps             3.3.0      2018-04-03 [1] CRAN (R 3.5.1)
## MASS             7.3-51.1   2018-11-01 [4] CRAN (R 3.5.1)
## Matrix           1.2-15     2018-11-01 [4] CRAN (R 3.5.1)
## matrixStats      * 0.54.0     2018-07-23 [1] CRAN (R 3.5.1)
## measurements     * 1.3.0      2018-12-09 [1] CRAN (R 3.5.1)
## memoise          1.1.0      2017-04-21 [1] CRAN (R 3.5.1)
## mgcv             1.8-26     2018-11-21 [4] CRAN (R 3.5.1)
## multtest         2.38.0     2018-10-30 [1] Bioconductor
## munsell          0.5.0      2018-06-12 [1] CRAN (R 3.5.1)
## nlme             * 3.1-137    2018-04-07 [4] CRAN (R 3.5.0)
## nnet             7.3-12     2016-02-02 [4] CRAN (R 3.5.0)
## permute          * 0.9-4      2016-09-09 [1] CRAN (R 3.5.1)
## phyloseq         * 1.26.0     2018-10-30 [1] Bioconductor
## pillar           1.3.0      2018-07-14 [1] CRAN (R 3.5.1)
## pkgbuild         1.0.2      2018-10-16 [1] CRAN (R 3.5.1)
## pkgconfig        2.0.2      2018-08-16 [1] CRAN (R 3.5.1)
## pkgload          1.0.2      2018-10-29 [1] CRAN (R 3.5.1)
## plyr             * 1.8.4      2016-06-08 [1] CRAN (R 3.5.1)
## polyclip         1.9-1      2018-07-27 [1] CRAN (R 3.5.1)
## polylabelr       0.1.0      2018-11-02 [1] CRAN (R 3.5.1)
## prettyunits      1.0.2      2015-07-13 [1] CRAN (R 3.5.1)
## processx         3.2.0      2018-08-16 [1] CRAN (R 3.5.1)
## ps               1.2.1      2018-11-06 [1] CRAN (R 3.5.1)
## purrr            0.2.5      2018-05-29 [1] CRAN (R 3.5.1)
## R6               2.3.0      2018-10-04 [1] CRAN (R 3.5.1)
## randomForest     * 4.6-14     2018-03-25 [1] CRAN (R 3.5.1)
## RColorBrewer     * 1.1-2      2014-12-07 [1] CRAN (R 3.5.1)
## Rcpp             1.0.0      2018-11-07 [1] CRAN (R 3.5.1)
## RCurl            1.95-4.11  2018-07-15 [1] CRAN (R 3.5.1)
## readr            1.2.1      2018-11-22 [1] CRAN (R 3.5.1)
## remotes          2.0.2      2018-10-30 [1] CRAN (R 3.5.1)
## reshape2        * 1.4.3      2017-12-11 [1] CRAN (R 3.5.1)
## rfPermute        * 2.1.6      2018-07-07 [1] CRAN (R 3.5.1)
## rfUtilities      * 2.1-3      2018-02-21 [1] CRAN (R 3.5.1)
## rhdf5            2.26.0     2018-10-30 [1] Bioconductor

```

```

## Rhdf5lib          1.4.1      2018-11-22 [1] Bioconductor
## rlang             0.3.0.1   2018-10-25 [1] CRAN (R 3.5.1)
## rmarkdown        1.10       2018-06-11 [1] CRAN (R 3.5.1)
## rpart            4.1-13    2018-02-23 [1] CRAN (R 3.5.1)
## rprojroot        1.3-2     2018-01-03 [1] CRAN (R 3.5.1)
## RSQLite          2.1.1     2018-05-06 [1] CRAN (R 3.5.1)
## rstudioapi       0.8       2018-10-02 [1] CRAN (R 3.5.1)
## rvest            0.3.2     2016-06-17 [1] CRAN (R 3.5.1)
## S4Vectors        * 0.20.1   2018-11-09 [1] Bioconductor
## scales           1.0.0     2018-08-09 [1] CRAN (R 3.5.1)
## sessioninfo      1.1.1     2018-11-05 [1] CRAN (R 3.5.1)
## spatstat         1.57-1    2018-11-04 [1] CRAN (R 3.5.1)
## spatstat.data    1.4-0     2018-10-04 [1] CRAN (R 3.5.1)
## spatstat.utils   1.13-0    2018-10-31 [1] CRAN (R 3.5.1)
## stringi          1.2.4     2018-07-20 [1] CRAN (R 3.5.1)
## stringr          1.3.1     2018-05-10 [1] CRAN (R 3.5.1)
## SummarizedExperiment * 1.12.0    2018-10-30 [1] Bioconductor
## survival         2.43-3    2018-11-26 [4] CRAN (R 3.5.1)
## swfscMisc        1.2       2016-08-23 [1] CRAN (R 3.5.1)
## tensor           1.5       2012-05-05 [1] CRAN (R 3.5.1)
## tibble           1.4.2     2018-01-22 [1] CRAN (R 3.5.1)
## tidyr            * 0.8.2    2018-10-28 [1] CRAN (R 3.5.1)
## tidyselect       0.2.5     2018-10-11 [1] CRAN (R 3.5.1)
## usethis          * 1.4.0    2018-08-14 [1] CRAN (R 3.5.1)
## vegan            * 2.5-3    2018-10-25 [1] CRAN (R 3.5.1)
## viridisLite      0.3.0     2018-02-01 [1] CRAN (R 3.5.1)
## withr            2.1.2     2018-03-15 [1] CRAN (R 3.5.1)
## XML              3.98-1.16 2018-08-19 [1] CRAN (R 3.5.1)
## xml2             1.2.0     2018-01-24 [1] CRAN (R 3.5.1)
## xtable           1.8-3     2018-08-29 [1] CRAN (R 3.5.1)
## XVector          0.22.0    2018-10-30 [1] Bioconductor
## yaml             2.2.0     2018-07-25 [1] CRAN (R 3.5.1)
## zlibbioc        1.28.0    2018-10-30 [1] Bioconductor
##
## [1] /home/local/vaho/R/x86_64-pc-linux-gnu-library/3.5
## [2] /usr/local/lib/R/site-library
## [3] /usr/lib/R/site-library
## [4] /usr/lib/R/library

```
